# Supplementary material for: Mirror effect of genomic deletions and duplications on cognitive ability across the human cerebral cortex
Source: Research Square preprint supplement (doi:10.21203/rs.3.rs-8099338/v1), 2025-11-28
Supplement: Supplementary file 1 [file 61759547bc5bc7220bd07005.xlsx]

## Sheet: ST_index
Table	Description
ST_index	Current table indexing all supplement tables
ST_column_key	list and description of all supplement table columns
Experiments_key	List of analysis and experiments with brief description
ST1	Data demographics
ST2	Overall burden analysis results
ST3	Cortical gene set burden analysis results
ST4	Summary statistics on gene count and number of CNV carriers
ST5	Summary statistics on cortical gene set effect sizes
ST6	Correlation between deletion and duplication effect size profiles
ST7	Correlation between the 20 neuromaps and deletion and duplication effect size profiles
ST8	Summary statistics on effect sizes for sensorimotor and association cortical axes
ST9	Del/Dup profile stability. Correlation between effect size profiles (del-del and dup-dup) across all pairs of analysis.
ST10	Fold change between regional specificity thresholds of Z>0.2 and Z>1.0, for sensorimotor and association cortical axes
ST11	GO-term enrichments in Glasser 180 cortical gene sets
ST12	Correlations between GO term enrichment profiles (across Glasser 180 cortical gene sets) and deletion/duplication effect size profiles

## Sheet: ST_column_key
Table	Column_name	Column_description
ST1	Cohort	Name of the general population cohort (e.g., UK Biobank).
ST1	N	Total number of individuals in the cohort.
ST1	Sex_Male	Number or proportion of male participants.
ST1	Sex_Female	Number or proportion of female participants.
ST1	Age_Mean	Mean age of participants.
ST1	Age_SD	Standard deviation of age for participants.
ST1	Ancestry_EUR	Number or proportion of participants of European ancestry.
ST1	Ancestry_Other	Number or proportion of participants of other ancestries.
ST1	Reference	Data source
ST1	Data_site_link	Daatset identifier, website link.
ST2	Analysis	Type of analysis or stratification being performed (e.g., main, independent dataset).
ST2	gene_set_exp_category	The general category of gene sets (e.g., genetic constraint, cell type, developmental epoch).
ST2	gene_set_exp	The specific gene set used (e.g., loss of function intolerance (LOEUF), specific cell type, or epoch).
ST2	cnv_type	The type of Copy Number Variant (Deletion or Duplication).
ST2	Estimate	The effect size estimate (slope β) from the linear model on cognitive ability (Z-scored). Overall burden, that is all genes deleted or duplicated without regional or spatil stratification.
ST2	SE	Standard Error of the effect size estimate.
ST2	tvalues	The t-statistic value for the effect size estimate.
ST2	pvalue	Nominal P-value for the effect size estimate.
ST2	aic, bic	Akaike Information Criterion (AIC) and Bayesian Information Criterion (BIC) for the model.
ST2	n_unique_genes	Number of unique genes disrupted by the CNV type in the region.
ST2	total_carriers	Total number of CNV carriers in the analysis.
ST2	N_total_genes	Total count of disrupted genes (including multiple occurrences across individuals).
ST3	gene_set_exp_category	The categorization of gene sets used (i.e., Cortical Regions for CC-GSBA).
ST3	gene_set_exp	The specific cortical region (e.g., 180 Glasser parcellation).
ST3	cnv_type	The type of Copy Number Variant (Deletion).
ST3	Estimate	The estimated effect size (β) for deletions on cognitive ability. For each cortical region gene set (spatial stratification).
ST3	pvalue	Nominal P-value for the deletion effect.
ST3	n_unique_genes	Number of unique genes disrupted by deletions in the region.
ST3	n_total_genes	Total count of genes disrupted by deletions (Gene-Set Burden) in the region.
ST3	AIC, BIC, SE, tvalue	Statistical measures for the linear model (AIC, BIC, Standard Error, t-statistic).
ST4	Category, Experiment_name	Category and name of the dataset or experiment (e.g., Full Dataset, Replication).
ST4	mean/min/max/sd_unq_genes_del/dup	Summary statistics (mean, min, max, SD) for the number of unique deleted/duplicated genes across all regions.
ST4	mean/min/max/sd_total_genes_del/dup	Summary statistics for the total count of deleted/duplicated genes (Gene-Set Burden).
ST4	mean/min/max/sd_cnv_carriers_del/dup	Summary statistics for the number of deletion/duplication carriers across all regions.
ST5	Experiment_name	Name of the comparison (e.g., Full Dataset vs. Replication, AHBA vs. HPA).
ST5	Del_mean, Dup_mean	Mean effect size for deletions and duplications across all regions.
ST5	Del_n-Signif-ROIs-AdjPval	Number of regions with Bonferroni-significant deletion effect sizes. Bonferroni correction applied across deletion and duplication estimates for an experiment category.
ST5	Dup_n-Signif-ROIs-AdjPval	Number of regions with Bonferroni-significant duplication effect sizes. Bonferroni correction applied across deletion and duplication estimates for an experiment category.
ST5	ratio_Del-ES..._by_Dup-ES...	Ratios comparing various deletion effect size metrics (ES) to duplication ES metrics.
ST5	Del/Dup_min/max/sd	Statistical measures (min, max, SD) of the effect sizes for Deletions and Duplications.
ST6	gene_set_exp_category	The categorization of gene sets used (e.g., genetic constraint: LOEUF, pHS, pTS).
ST6	gene_set_exp	The specific stratification group (e.g., Intolerant, Tolerant, cell type).
ST6	cor_del_dup	Pearson correlation coefficient (r) between deletion and duplication effect sizes across regions within this gene set category. Regions significant for either deletions or duplications used for correlation.
ST6	pspin_cor_del_dup_FDR	FDR-adjusted P-value from spin permutation testing for the correlation.
ST6	cor_del_dup_95CI_min/max	Lower and upper bounds of the 95% confidence interval for the correlation coefficient.
ST7	neuromap	Name of the 20 reference brain maps used for annotation (e.g., Cortical thickness, PC1 NeuroSynth).
ST7	cnv_type	Deletion or Duplication.
ST7	corr	Pearson correlation coefficient (r) between the CNV effect size map and the reference neuromap.
ST7	pval, pval_FDR	Nominal and FDR-adjusted P-values from the spin permutation test accounting for spatial autocorrelation (and gene-set overlap) between cortical regions.
ST8	gene_set_exp	The specific gene set used (e.g., loss of function intolerance (LOEUF), specific cell type, or epoch).
ST8	cnv_type	Deletion or Duplication.
ST8	mean_effectsize_sensorimotor	Mean effect size in the sensorimotor regions.
ST8	mean_effectsize_association	Mean effect size in the multimodal association regions.
ST8	pvalue_sensori_vs_assoc_FDR	FDR-adjusted P-value from a test comparing the sensorimotor and association effect sizes.
ST8	cohenD_sensori_vs_assoc	Cohen's d effect size comparing sensorimotor and association region effect sizes.
ST8	...95CI_lower/upper	95% Confidence Interval bounds for the mean effect sizes.
ST8	KolmogorovSmirnov...	Statistics from the Kolmogorov-Smirnov test comparing the distributions of effect sizes.
ST9	cor_pair	Label describing the pair of maps being correlated (Deletion-Deletion or Duplication-Duplication).
ST9	cor_input1_vs_input2	Pearson correlation coefficient (r) between the two input maps.
ST9	pspin_input1_vs_input2_FDR	FDR-adjusted P-value from spin permutation testing for the correlation.
ST9	cor_95CI_min/max_input1_vs_input2	Lower and upper bounds of the 95% CI for the correlation coefficient.
ST9	gene_set_exp_category/input1/input2	Details about the specific maps being correlated.
ST10	Sensitivity_analysis	Description of the sensitivity test performed (e.g., Age stratified, Sex stratified).
ST10	cnv_type	Deletion or Duplication.
ST10	foldchange	The ratio of mean effect sizes between the tested gene sets.
ST10	pvalue_Welch_FDR	FDR-adjusted P-value from a Welch's t-test comparing effect sizes.
ST10	foldchange_direction	Foldchange direction increase or decrease.
ST11	pathway, pathway_cat	Name and category of the GO-term or molecular pathway.
ST11	region	Cortical region in the 180 Glasser parcellation.
ST11	ES, NES	Enrichment Score (ES) and Normalized Enrichment Score (NES) of the pathway in the region.
ST11	p, p_fdr	Nominal and FDR-adjusted P-values for the enrichment.
ST11	size	Size of the pathway's gene set.
ST12	pathway_name	Name of the Gene Ontology (GO) term or molecular pathway.
ST12	cor_es_del, cor_es_dup	Pearson correlation coefficient (r) between the GO-term enrichment map and the deletion or duplication effect size maps.
ST12	pval_cor_es_del_FDR, pval_cor_es_dup_FDR	FDR-adjusted P-values for the spatial correlation with deletion and duplication effect size maps.
ST12	pathway_size	Size of the pathway's gene set.

## Sheet: Experiments_key
Analysis_category	Experiment_list	Description
All_data_analysis_fig2	All_data_analysis_Fig2	Main analysis using all data
regional_specificity_threshold	Z0p2	all data analysis with 180 Glasser cortical gene sets created using regional specificity threshold of Z>0.2
regional_specificity_threshold	Z0p5	all data analysis with 180 Glasser cortical gene sets created using regional specificity threshold of Z>0.5
regional_specificity_threshold	Z0p8	all data analysis with 180 Glasser cortical gene sets created using regional specificity threshold of Z>0.8
regional_specificity_threshold	Z1p0	all data analysis with 180 Glasser cortical gene sets created using regional specificity threshold of Z>1.0
regional_specificity_threshold	Z1p2	all data analysis with 180 Glasser cortical gene sets created using regional specificity threshold of Z>1.2
genetic_constraint	genetic_constraint_loeuf_0p0_0p35	Intolerant gene set analysis with 180 Glasser cortical gene sets created using genes with genetic constraint (Loeuf score) between 0 and 0.35
genetic_constraint	genetic_constraint_loeuf_0p35_1p0	Mildly intolerant gene set analysis with 180 Glasser cortical gene sets created using genes with genetic constraint (Loeuf score) between 0.35 and 1
genetic_constraint	genetic_constraint_loeuf_1p0_2p0	Tolerant gene set analysis with 180 Glasser cortical gene sets created using genes with genetic constraint (Loeuf score) between 1 and 2
gene_expression_data	hpa_RNAseq_73regions	analysis using cortical gene sets created from an independent RNA-seq data resource (Human Protein Atlas, HPA, v22, with 73 cortical regions)
gene_expression_data	BrainSpan_adult_RNAseq_11regions	analysis using cortical gene sets created from an independent RNA-seq data resource (BrainSpan adults, with 11 cortical regions)
data_subset	UKBB	analysis using data-subset with UK Biobank participants only
data_subset	Other_5cohort	analysis using data-subset with 5 general pipulation participants, excluding UK Biobank
data_subset	Discovery	analysis using data-subset created by spliting data into discovery and replication subsets (half the data)
data_subset	Replication	analysis using data-subset created by spliting data into discovery and replication subsets (half the data)
data_subset	UKBB_FI_center_visit	analysis using data and phenotype subset with UK Biobank participants who were assessed at the assessment center
data_subset	UKBB_FI_online	analysis using data and phenotype subset with UK Biobank participants who were assessed online
demograhpics_subset	Ancestry_EUR	analysis using European (EUR) ancestry participants only
demograhpics_subset	Sex_Male	sex stratified analysis
demograhpics_subset	Sex_Female	sex stratified analysis
demograhpics_subset	Age_lessthan_60	Age stratified analysis with participant age less than 60
demograhpics_subset	Age_greaterthan_60	Age stratified analysis with participant age greater than 60
gene_expression_AHBA_quality	gene_exp_AHBA_quality_DS0p1	Gene expression data quality for AHBA, as measured by differentialy stability metric, considering genes with DS metric > 0.1
gene_expression_AHBA_quality	gene_exp_AHBA_quality_DS0p2	Gene expression data quality for AHBA, as measured by differentialy stability metric, considering genes with DS metric > 0.2
gene_expression_AHBA_quality	gene_exp_AHBA_quality_DS0p3	Gene expression data quality for AHBA, as measured by differentialy stability metric, considering genes with DS metric > 0.3
gene_expression_AHBA_quality	gene_exp_AHBA_quality_DS0p4	Gene expression data quality for AHBA, as measured by differentialy stability metric, considering genes with DS metric > 0.4
gene_expression_AHBA_quality	gene_exp_AHBA_quality_DS0p5	Gene expression data quality for AHBA, as measured by differentialy stability metric, considering genes with DS metric > 0.5
gene_expression_AHBA_quality	gene_exp_AHBA_quality_DS0p6	Gene expression data quality for AHBA, as measured by differentialy stability metric, considering genes with DS metric > 0.6
gene_expression_AHBA_sensitivity	AHBA_PausLab_Desikan	Independent AHBA gene expression data processing mapped to Desikan brain parcellation from Paus Lab
gene_expression_AHBA_sensitivity	AHBA_schaefer100x7MNI	Brain parcellation impact, AHBA gene expression data mapped to Schaefer100x7MNI parcellation, with 50 corticalregions in left hemisphere
gene_expression_AHBA_sensitivity	AHBA_schaefer200x7MNI	Brain parcellation impact, AHBA gene expression data mapped to Schaefer200x7MNI parcellation, with 100 corticalregions in left hemisphere
gene_expression_AHBA_sensitivity	AHBA_schaefer300x7MNI	Brain parcellation impact, AHBA gene expression data mapped to Schaefer300x7MNI parcellation, with 150 corticalregions in left hemisphere
gene_expression_AHBA_sensitivity	AHBA_schaefer400x7MNI	Brain parcellation impact, AHBA gene expression data mapped to Schaefer400x7MNI parcellation, with 50 corticalregions in left hemisphere
tissue_specificity	hpa_brain_elevated	Tissue specific (Brain specific) Glasser 180 cortical gene sets created by keeping only brain elevated genes, as defined using Human Protein Atlas (HPA v22)
tissue_specificity	hpa_other_tissue_elevated	Tissue specific (Non-Brain elevated) Glasser 180 cortical gene sets created by keeping only non-brain elevated genes, as defined using Human Protein Atlas (HPA v22)
tissue_specificity	hpa_low_tissue_specificity	Tissue specific (non-specific) Glasser 180 cortical gene sets created by keeping only non-specific (low tissue specificity) genes, as defined using Human Protein Atlas (HPA v22)
temporal_expression_BrainVAR_PeakEpoch	BrainVar_PeakEpoch1	Temporal expression peak in Epoch1 (10 to 19 post-conception weeks) based Glasser 180 cortical gene sets, as defined using BrainVAR (Werling et al)
temporal_expression_BrainVAR_PeakEpoch	BrainVar_PeakEpoch2	Temporal expression peak in Epoch2 (19 post-conception weeks to 6 post natal months) based Glasser 180 cortical gene sets, as defined using BrainVAR (Werling et al)
temporal_expression_BrainVAR_PeakEpoch	BrainVar_PeakEpoch3	Temporal expression peak in Epoch3 (6 months to adulthood) based Glasser 180 cortical gene sets, as defined using BrainVAR (Werling et al)
temporal_expression_BrainVAR_trajectory	BrainVar_trajectory_Falling	Temporal expression trajectory category (Falling expression, from pre-natal to adult) based Glasser 180 cortical gene sets, as defined using BrainVAR (Werling et al)
temporal_expression_BrainVAR_trajectory	BrainVar_trajectory_NonTransitional	Temporal expression trajectory category (NonTransitional expression, from pre-natal to adult) based Glasser 180 cortical gene sets, as defined using BrainVAR (Werling et al)
temporal_expression_BrainVAR_trajectory	BrainVar_trajectory_Rising	Temporal expression trajectory category (Rising expression, from pre-natal to adult) based Glasser 180 cortical gene sets, as defined using BrainVAR (Werling et al)
cell_type_markers	Excitatory	Excitatory cell type markers based Glasser 180 cortical gene sets, as defined using Human Protein Atlas (HPA v22)
cell_type_markers	Inhibitory	Inhibitory cell type markers based Glasser 180 cortical gene sets, as defined using Human Protein Atlas (HPA v22)
cell_type_markers	Astrocytes	Astrocytes cell type markers based Glasser 180 cortical gene sets, as defined using Human Protein Atlas (HPA v22)
cell_type_markers	Microglial	Microglial cell type markers based Glasser 180 cortical gene sets, as defined using Human Protein Atlas (HPA v22)
cell_type_markers	Oligodendrocyte	Oligodendrocyte cell type markers based Glasser 180 cortical gene sets, as defined using Human Protein Atlas (HPA v22)
cell_type_markers	OligodendrocytePrecursorCells_OPC	OligodendrocytePrecursorCells_OPC cell type markers based Glasser 180 cortical gene sets, as defined using Human Protein Atlas (HPA v22)
genetic_constraint	genetic_constraint_pHaplo_cat_low	Genetic constraint gene set analysis with 180 Glasser cortical gene sets created using genes with probability of haploinsufficiency (pHS or pHaplo, from Collins et al) in bottom 30 percentile
genetic_constraint	genetic_constraint_pHaplo_cat_mid	Genetic constraint gene set analysis with 180 Glasser cortical gene sets created using genes with probability of haploinsufficiency (pHS or pHaplo, from Collins et al) in between 30th and 70th percentile
genetic_constraint	genetic_constraint_pHaplo_cat_high	Genetic constraint gene set analysis with 180 Glasser cortical gene sets created using genes with probability of haploinsufficiency (pHS or pHaplo from Collins et al) in top 30 percentile
genetic_constraint	genetic_constraint_pTriplo_cat_low	Genetic constraint gene set analysis with 180 Glasser cortical gene sets created using genes with probability of triplosensitivity (pTS or pTriplo, from Collins et al) in bottom 30 percentile
genetic_constraint	genetic_constraint_pTriplo_cat_mid	Genetic constraint gene set analysis with 180 Glasser cortical gene sets created using genes with probability of triplosensitivity (pTS or pTriplo, from Collins et al) in between 30th and 70th percentile
genetic_constraint	genetic_constraint_pTriplo_cat_high	Genetic constraint gene set analysis with 180 Glasser cortical gene sets created using genes with probability of triplosensitivity (pTS or pTriplo from Collins et al) in top 30 percentile
genetic_constraint	genetic_constraint_missense_Z_cat_low	Genetic constraint gene set analysis with 180 Glasser cortical gene sets created using genes with Missense Z-score (gnomad v2.1) in bottom 30 percentile
genetic_constraint	genetic_constraint_missense_Z_cat_mid	Genetic constraint gene set analysis with 180 Glasser cortical gene sets created using genes with Missense Z-score (gnomad v2.1) in between 30th and 70th percentile
genetic_constraint	genetic_constraint_missense_Z_cat_high	Genetic constraint gene set analysis with 180 Glasser cortical gene sets created using genes with Missense Z-score (gnomad v2.1) in top 30 percentile
gene_expression_AHBA_sensitivity	gene_expression_AHBA_Wagstyl_16modules	Independent AHBA gene expression data processing from Wagstyl et al creating 16 modules, which are then used as gene sets

## Sheet: ST1
Cohort	N	Sex_Male	Sex_Female	Age_Mean	Age_SD	Ancestry_EUR	Ancestry_Other	Reference	Data_site_link
CARTaGENE (CaG)	2589	1214	1375	53.94	7.84	2472	117	Awadalla, P. et al. 2013	https://cartagene.qc.ca/
Generation Scotland (G-Scot)	13715	5634	8081	46.73	15	13672	43	Smith, B. H. et al. 2013	https://genscot.igc.ed.ac.uk/welcome
IMAGEN	1744	853	891	14.45	0.37	1624	120	Schumann, G. et al. 2010	https://imagen.squarespace.com/
Lothian Birth Cohort (LBC)	503	257	246	70	0.83	500	3	Deary, I. J. et al. 2007	https://lothian-birth-cohorts.ed.ac.uk
Saguenay Youth Study (SYS)	1565	741	824	28.18	17.1	1561	4	Pausova, Z. et al. 2017	https://saguenay-youth-study.org/
UK Biobank	238176	108451	129725	59.03	8.59	225733	12443	Sudlow et al. 2015	https://www.ukbiobank.ac.uk/
Total	258292	117150	141142	57.57	10.81	245562	12730

## Sheet: ST2
Analysis	gene_set_exp_category	gene_set_exp	cnv_type	Estimate	SE	pvalue	n_unique_genes	N_total_genes	total_carriers	gene_list_n	aic	bic	tvalues
Overall_burden	All_data_analysis_fig2	All_data_analysis_Fig2	DEL	-0.0350762	0.00273883	1.53806e-37	4405	28108	13055	13678	711973	712004	-12.807
Overall_burden	genetic_constraint	genetic_constraint_loeuf_0p0_0p35	DEL	-0.146778	0.017302	2.20034e-17	550	2461	1878	2157	711960	711992	-8.4833
Overall_burden	genetic_constraint	genetic_constraint_loeuf_0p35_1p0	DEL	-0.0594536	0.00620135	9.12725e-22	2017	10406	6349	5592	711973	712004	-9.58719
Overall_burden	genetic_constraint	genetic_constraint_loeuf_1p0_2p0	DEL	-0.0193125	0.00671676	0.00403721	1838	15241	11083	4105	712013	712044	-2.87527
Overall_burden	All_data_analysis_fig2	All_data_analysis_Fig2	DUP	-0.0156615	0.00143295	8.44376e-28	8601	77695	22241	13678	712000	712031	-10.9295
Overall_burden	genetic_constraint	genetic_constraint_loeuf_0p0_0p35	DUP	-0.0708468	0.00893618	2.2343e-15	1375	9218	6068	2157	711976	712008	-7.92809
Overall_burden	genetic_constraint	genetic_constraint_loeuf_0p35_1p0	DUP	-0.0216528	0.00330529	5.72861e-11	4078	36569	16905	5592	712010	712041	-6.55093
Overall_burden	genetic_constraint	genetic_constraint_loeuf_1p0_2p0	DUP	-0.00811061	0.00373109	0.0297218	3148	31908	15035	4105	712023	712054	-2.17379

## Sheet: ST3
gene_set_exp_category	gene_set_exp	cnv_type	gene_set_name	Estimate	SE	tvalue	pvalue	AIC	BIC	n_unique_genes	n_total_genes	n_cnv_carriers	n_gene_set_size
All_data_analysis_fig2	All_data_analysis_Fig2	DEL	L_V1	-0.0685114	0.00756967	-9.05077	1.42911e-19	711972	712004	1511	11056	7461	4771
All_data_analysis_fig2	All_data_analysis_Fig2	DEL	L_MST	-0.0109506	0.0108849	-1.00603	0.3144	712012	712043	869	6279	5142	2726
All_data_analysis_fig2	All_data_analysis_Fig2	DEL	L_V6	-0.0468692	0.00604926	-7.74792	9.37454e-15	711994	712025	1630	13414	7741	5098
All_data_analysis_fig2	All_data_analysis_Fig2	DEL	L_V2	-0.0708117	0.00682987	-10.3679	3.50886e-25	711958	711989	1461	11676	7494	4471
All_data_analysis_fig2	All_data_analysis_Fig2	DEL	L_V3	-0.0358423	0.0093117	-3.84916	0.00011855	712011	712042	1111	6903	5077	3524
All_data_analysis_fig2	All_data_analysis_Fig2	DEL	L_V4	-0.0467753	0.00887418	-5.27094	1.35834e-07	712005	712036	1370	9842	7612	4253
All_data_analysis_fig2	All_data_analysis_Fig2	DEL	L_V8	-0.0359553	0.0080871	-4.446	8.75195e-06	712010	712041	1462	8358	5891	4661
All_data_analysis_fig2	All_data_analysis_Fig2	DEL	L_4	-0.0927889	0.00880392	-10.5395	5.75016e-26	711945	711976	1216	7289	4060	3796
All_data_analysis_fig2	All_data_analysis_Fig2	DEL	L_3b	-0.0825329	0.00835527	-9.87795	5.23758e-23	711957	711989	1221	8861	5709	3956
All_data_analysis_fig2	All_data_analysis_Fig2	DEL	L_FEF	-0.00768252	0.0103926	-0.739231	0.459768	712011	712043	994	6301	4811	3077
All_data_analysis_fig2	All_data_analysis_Fig2	DEL	L_PEF	-0.0725183	0.00612762	-11.8347	2.63413e-32	711938	711969	2026	10937	5175	6484
All_data_analysis_fig2	All_data_analysis_Fig2	DEL	L_55b	-0.0664172	0.00793988	-8.36501	6.04024e-17	711980	712011	1472	7820	4832	4537
All_data_analysis_fig2	All_data_analysis_Fig2	DEL	L_V3A	-0.0692815	0.00907172	-7.63709	2.22948e-14	711984	712016	1359	8252	5911	4378
All_data_analysis_fig2	All_data_analysis_Fig2	DEL	L_RSC	-0.0108999	0.0129656	-0.84068	0.400528	712012	712044	898	3882	2630	2739
All_data_analysis_fig2	All_data_analysis_Fig2	DEL	L_POS2	-0.060285	0.00842909	-7.15201	8.57396e-13	711991	712022	1055	10297	7680	3174
All_data_analysis_fig2	All_data_analysis_Fig2	DEL	L_V7	-0.0284598	0.00646633	-4.40123	1.07684e-05	712012	712043	1993	13716	8954	5969
All_data_analysis_fig2	All_data_analysis_Fig2	DEL	L_IPS1	-0.0738574	0.00612411	-12.0601	1.75169e-33	711934	711965	1710	12011	6984	5406
All_data_analysis_fig2	All_data_analysis_Fig2	DEL	L_FFC	-0.0326765	0.00797214	-4.09883	4.15363e-05	712011	712042	1211	7720	5306	3953
All_data_analysis_fig2	All_data_analysis_Fig2	DEL	L_V3B	-0.0545546	0.00678702	-8.03808	9.16386e-16	711988	712019	1937	12151	7488	5742
All_data_analysis_fig2	All_data_analysis_Fig2	DEL	L_LO1	-0.0570032	0.00495498	-11.5042	1.27793e-30	711955	711986	1921	12258	5930	6039
All_data_analysis_fig2	All_data_analysis_Fig2	DEL	L_LO2	-0.0511507	0.00553749	-9.23717	2.5493e-20	711981	712013	1897	16054	9304	5825
All_data_analysis_fig2	All_data_analysis_Fig2	DEL	L_PIT	-0.0563826	0.00666681	-8.45721	2.75257e-17	711984	712015	1596	12575	8750	4996
All_data_analysis_fig2	All_data_analysis_Fig2	DEL	L_MT	-0.0356778	0.00666824	-5.35041	8.78314e-08	712008	712040	1684	13211	8839	5198
All_data_analysis_fig2	All_data_analysis_Fig2	DEL	L_A1	-0.0648477	0.00704886	-9.19975	3.61339e-20	711973	712004	1690	11722	7486	5125
All_data_analysis_fig2	All_data_analysis_Fig2	DEL	L_PSL	-0.0228402	0.0125878	-1.81447	0.0696061	712013	712044	707	4770	3898	2230
All_data_analysis_fig2	All_data_analysis_Fig2	DEL	L_SFL	-0.0727324	0.0118195	-6.15358	7.58641e-10	711994	712025	873	5548	4435	2694
All_data_analysis_fig2	All_data_analysis_Fig2	DEL	L_PCV	-0.10124	0.0126162	-8.02458	1.02298e-15	711972	712004	697	4970	3913	2231
All_data_analysis_fig2	All_data_analysis_Fig2	DEL	L_STV	-0.0789767	0.0111178	-7.10363	1.21833e-12	711986	712017	709	4202	3015	2323
All_data_analysis_fig2	All_data_analysis_Fig2	DEL	L_7Pm	-0.0836107	0.0100248	-8.3404	7.43952e-17	711974	712005	1059	7379	5518	3375
All_data_analysis_fig2	All_data_analysis_Fig2	DEL	L_7m	-0.119548	0.0132024	-9.05501	1.37473e-19	711957	711988	678	4240	3015	2067
All_data_analysis_fig2	All_data_analysis_Fig2	DEL	L_POS1	-0.0801581	0.0120981	-6.62569	3.46305e-11	711989	712020	833	6091	5056	2677
All_data_analysis_fig2	All_data_analysis_Fig2	DEL	L_23d	-0.0649849	0.00589473	-11.0242	2.96246e-28	711954	711985	1813	13052	7526	5693
All_data_analysis_fig2	All_data_analysis_Fig2	DEL	L_v23ab	-0.0674924	0.00876264	-7.70229	1.34124e-14	711984	712016	1378	8228	5878	4163
All_data_analysis_fig2	All_data_analysis_Fig2	DEL	L_d23ab	-0.0267215	0.00874225	-3.05659	0.00223894	712013	712044	1435	7986	5504	4570
All_data_analysis_fig2	All_data_analysis_Fig2	DEL	L_31pv	-0.0433805	0.00978644	-4.43272	9.30917e-06	712008	712039	1023	6642	4868	3275
All_data_analysis_fig2	All_data_analysis_Fig2	DEL	L_5m	-0.106696	0.00960085	-11.1132	1.09831e-28	711932	711963	1165	6502	3624	3496
All_data_analysis_fig2	All_data_analysis_Fig2	DEL	L_5mv	-0.0432272	0.00887457	-4.87091	1.1115e-06	712007	712038	1377	9015	6676	4157
All_data_analysis_fig2	All_data_analysis_Fig2	DEL	L_23c	-0.0323771	0.0129541	-2.49936	0.0124423	712012	712044	882	3930	2781	2643
All_data_analysis_fig2	All_data_analysis_Fig2	DEL	L_5L	-0.0734323	0.00744839	-9.85882	6.33707e-23	711962	711993	1573	8660	4862	4896
All_data_analysis_fig2	All_data_analysis_Fig2	DEL	L_24dd	-0.0390549	0.00898388	-4.34722	1.37929e-05	712009	712040	1229	7502	5320	3833
All_data_analysis_fig2	All_data_analysis_Fig2	DEL	L_24dv	-0.0508327	0.014407	-3.52832	0.00041828	712009	712040	798	3256	2339	2618
All_data_analysis_fig2	All_data_analysis_Fig2	DEL	L_7AL	-0.0776681	0.00897356	-8.65521	4.94736e-18	711972	712004	877	7808	5231	2869
All_data_analysis_fig2	All_data_analysis_Fig2	DEL	L_SCEF	-0.0879812	0.0128138	-6.86612	6.61215e-12	711986	712017	932	4866	3825	3002
All_data_analysis_fig2	All_data_analysis_Fig2	DEL	L_6ma	-0.0517693	0.00877532	-5.89943	3.65217e-09	712001	712032	1539	8687	5896	4607
All_data_analysis_fig2	All_data_analysis_Fig2	DEL	L_7Am	-0.0808785	0.00968056	-8.35473	6.59008e-17	711974	712006	982	6247	4601	2979
All_data_analysis_fig2	All_data_analysis_Fig2	DEL	L_7PL	-0.0542337	0.00818522	-6.6258	3.46044e-11	711996	712028	1364	10073	7113	4053
All_data_analysis_fig2	All_data_analysis_Fig2	DEL	L_7PC	-0.0725666	0.0100083	-7.25063	4.16001e-13	711986	712018	1118	5150	2870	3639
All_data_analysis_fig2	All_data_analysis_Fig2	DEL	L_LIPv	-0.0849904	0.0077588	-10.9541	6.44374e-28	711943	711974	1142	8097	4679	3453
All_data_analysis_fig2	All_data_analysis_Fig2	DEL	L_VIP	-0.0836921	0.00795871	-10.5158	7.39527e-26	711949	711981	1513	8569	4811	4700
All_data_analysis_fig2	All_data_analysis_Fig2	DEL	L_MIP	-0.0579665	0.00759886	-7.62831	2.3865e-14	711989	712020	1380	11731	8048	4280
All_data_analysis_fig2	All_data_analysis_Fig2	DEL	L_1	-0.0998918	0.0094031	-10.6233	2.35196e-26	711941	711973	1217	6319	3853	3968
All_data_analysis_fig2	All_data_analysis_Fig2	DEL	L_2	-0.0810321	0.0101637	-7.97272	1.55848e-15	711978	712009	892	6728	5073	3025
All_data_analysis_fig2	All_data_analysis_Fig2	DEL	L_3a	-0.0671081	0.00816829	-8.21569	2.11908e-16	711981	712012	1550	8569	5626	4748
All_data_analysis_fig2	All_data_analysis_Fig2	DEL	L_6d	-0.0956714	0.00885714	-10.8016	3.42753e-27	711940	711972	1205	7241	4160	3804
All_data_analysis_fig2	All_data_analysis_Fig2	DEL	L_6mp	-0.0447784	0.00990566	-4.52049	6.17244e-06	712007	712039	1162	5223	3229	3823
All_data_analysis_fig2	All_data_analysis_Fig2	DEL	L_6v	-0.0726303	0.0108339	-6.70399	2.03216e-11	711990	712022	1168	7024	5324	3644
All_data_analysis_fig2	All_data_analysis_Fig2	DEL	L_p24pr	-0.0460237	0.00729776	-6.30655	2.8578e-10	712001	712033	1685	11324	7603	5057
All_data_analysis_fig2	All_data_analysis_Fig2	DEL	L_33pr	-0.048771	0.00812428	-6.00312	1.93824e-09	712001	712033	1666	9561	6693	5049
All_data_analysis_fig2	All_data_analysis_Fig2	DEL	L_a24pr	-0.0235135	0.00716154	-3.2833	0.00102614	712013	712044	1699	8863	5598	5464
All_data_analysis_fig2	All_data_analysis_Fig2	DEL	L_p32pr	-0.0429281	0.00696391	-6.16436	7.08711e-10	712003	712034	1835	10708	7086	5763
All_data_analysis_fig2	All_data_analysis_Fig2	DEL	L_a24	-0.0278926	0.00835027	-3.34033	0.000836917	712012	712044	1349	8040	5769	4370
All_data_analysis_fig2	All_data_analysis_Fig2	DEL	L_d32	-0.0241115	0.0081913	-2.94355	0.00324498	712013	712044	1540	9057	6697	4671
All_data_analysis_fig2	All_data_analysis_Fig2	DEL	L_8BM	-0.0294949	0.00854366	-3.45225	0.000556015	712012	712043	1339	8530	5927	4187
All_data_analysis_fig2	All_data_analysis_Fig2	DEL	L_p32	-0.0267741	0.00603151	-4.43904	9.03989e-06	712012	712044	1847	11695	6539	5901
All_data_analysis_fig2	All_data_analysis_Fig2	DEL	L_10r	-0.0359658	0.00907301	-3.96404	7.37107e-05	712010	712042	1190	7901	5542	3786
All_data_analysis_fig2	All_data_analysis_Fig2	DEL	L_47m	-0.0714231	0.00821025	-8.69925	3.35984e-18	711974	712006	1700	9969	6421	5198
All_data_analysis_fig2	All_data_analysis_Fig2	DEL	L_8Av	-0.0940125	0.0103562	-9.07792	1.11414e-19	711963	711994	1057	6165	3880	3350
All_data_analysis_fig2	All_data_analysis_Fig2	DEL	L_8Ad	-0.0565505	0.00763396	-7.40775	1.28849e-13	711991	712022	1420	8060	4920	4485
All_data_analysis_fig2	All_data_analysis_Fig2	DEL	L_9m	-0.0289476	0.00724719	-3.99431	6.48996e-05	712012	712043	1271	6290	3391	3925
All_data_analysis_fig2	All_data_analysis_Fig2	DEL	L_8BL	-0.0476192	0.0119322	-3.99083	6.58608e-05	712008	712040	683	4030	2727	2179
All_data_analysis_fig2	All_data_analysis_Fig2	DEL	L_9p	-0.0398444	0.00752828	-5.29263	1.20671e-07	712007	712038	1375	6960	4173	4395
All_data_analysis_fig2	All_data_analysis_Fig2	DEL	L_10d	-0.0449825	0.00623197	-7.21802	5.28938e-13	711998	712029	1963	12431	7379	5878
All_data_analysis_fig2	All_data_analysis_Fig2	DEL	L_8C	-0.0341892	0.010575	-3.233	0.00122511	712012	712043	1262	5292	3743	3847
All_data_analysis_fig2	All_data_analysis_Fig2	DEL	L_44	-0.0633924	0.00844903	-7.50293	6.26055e-14	711987	712019	1191	6790	4362	3752
All_data_analysis_fig2	All_data_analysis_Fig2	DEL	L_45	-0.0421181	0.00895786	-4.7018	2.58007e-06	712008	712039	1380	10113	8064	4120
All_data_analysis_fig2	All_data_analysis_Fig2	DEL	L_47l	-0.036965	0.00796406	-4.64148	3.46089e-06	712009	712040	1575	9383	6408	4744
All_data_analysis_fig2	All_data_analysis_Fig2	DEL	L_a47r	-0.0266128	0.0157709	-1.68747	0.0915147	712013	712044	550	2558	2006	1606
All_data_analysis_fig2	All_data_analysis_Fig2	DEL	L_6r	-0.050459	0.00684984	-7.36644	1.75759e-13	711994	712025	1524	10801	5908	4608
All_data_analysis_fig2	All_data_analysis_Fig2	DEL	L_IFJa	-0.0459273	0.00707282	-6.4935	8.40186e-11	712000	712032	1913	11318	7473	5984
All_data_analysis_fig2	All_data_analysis_Fig2	DEL	L_IFJp	-0.0413693	0.00816155	-5.06881	4.00584e-07	712007	712038	1680	11114	8185	5065
All_data_analysis_fig2	All_data_analysis_Fig2	DEL	L_IFSp	-0.0470631	0.00963131	-4.88647	1.0272e-06	712006	712037	1216	6442	4270	3920
All_data_analysis_fig2	All_data_analysis_Fig2	DEL	L_IFSa	-0.0484098	0.00613555	-7.89005	3.03234e-15	711992	712024	1901	8674	4478	6066
All_data_analysis_fig2	All_data_analysis_Fig2	DEL	L_p9.46v	-0.055559	0.00519325	-10.6983	1.05013e-26	711965	711996	2229	12969	6809	7065
All_data_analysis_fig2	All_data_analysis_Fig2	DEL	L_46	-0.0458878	0.0062899	-7.29548	2.9845e-13	711997	712028	1581	10210	6295	5044
All_data_analysis_fig2	All_data_analysis_Fig2	DEL	L_a9.46v	-0.0400488	0.00909017	-4.40573	1.05471e-05	712009	712040	1283	6208	3817	4007
All_data_analysis_fig2	All_data_analysis_Fig2	DEL	L_9.46d	-0.0283667	0.0067705	-4.18975	2.79349e-05	712012	712043	1366	7197	4538	4315
All_data_analysis_fig2	All_data_analysis_Fig2	DEL	L_9a	-0.0668316	0.0120907	-5.52753	3.25082e-08	711999	712030	794	6230	5353	2460
All_data_analysis_fig2	All_data_analysis_Fig2	DEL	L_10v	-0.0438459	0.00691974	-6.33635	2.35651e-10	712002	712033	1383	9457	6435	4521
All_data_analysis_fig2	All_data_analysis_Fig2	DEL	L_a10p	-0.0564104	0.00626828	-8.99933	2.28578e-19	711980	712011	1886	13621	8555	5923
All_data_analysis_fig2	All_data_analysis_Fig2	DEL	L_10pp	-0.0366616	0.00770058	-4.76089	1.9285e-06	712009	712040	1276	9544	6805	3946
All_data_analysis_fig2	All_data_analysis_Fig2	DEL	L_11l	-0.0743897	0.0126757	-5.86867	4.39846e-09	711995	712027	941	4823	3687	2813
All_data_analysis_fig2	All_data_analysis_Fig2	DEL	L_13l	-0.0335784	0.0121254	-2.76927	0.00561856	712012	712043	926	4086	2891	2996
All_data_analysis_fig2	All_data_analysis_Fig2	DEL	L_OFC	-0.0269374	0.00829993	-3.2455	0.00117261	712013	712044	1100	6616	4322	3485
All_data_analysis_fig2	All_data_analysis_Fig2	DEL	L_47s	-0.0174005	0.0110724	-1.57151	0.116064	712013	712044	993	5432	4251	3056
All_data_analysis_fig2	All_data_analysis_Fig2	DEL	L_LIPd	-0.0780503	0.00887096	-8.7984	1.39605e-18	711971	712002	1470	8358	5810	4486
All_data_analysis_fig2	All_data_analysis_Fig2	DEL	L_6a	-0.0912935	0.0105798	-8.62904	6.2211e-18	711968	712000	834	5106	2975	2593
All_data_analysis_fig2	All_data_analysis_Fig2	DEL	L_i6.8	-0.0433921	0.0101416	-4.27862	1.88122e-05	712008	712040	984	5010	3354	3228
All_data_analysis_fig2	All_data_analysis_Fig2	DEL	L_s6.8	-0.0509803	0.0090598	-5.62709	1.83463e-08	712002	712033	1318	8008	5583	4020
All_data_analysis_fig2	All_data_analysis_Fig2	DEL	L_43	-0.0572695	0.00887615	-6.45206	1.10533e-10	711996	712028	1058	6227	3983	3394
All_data_analysis_fig2	All_data_analysis_Fig2	DEL	L_OP4	-0.0549639	0.0103202	-5.32584	1.00571e-07	712002	712034	846	5088	3588	2663
All_data_analysis_fig2	All_data_analysis_Fig2	DEL	L_OP1	-0.125777	0.0180109	-6.98341	2.88793e-12	711979	712011	507	2959	2579	1609
All_data_analysis_fig2	All_data_analysis_Fig2	DEL	L_OP2.3	-0.0538788	0.00653111	-8.24956	1.59709e-16	711987	712018	1761	11462	6503	5635
All_data_analysis_fig2	All_data_analysis_Fig2	DEL	L_52	-0.0556544	0.00678461	-8.20304	2.35452e-16	711986	712017	1358	11512	6649	4344
All_data_analysis_fig2	All_data_analysis_Fig2	DEL	L_RI	-0.0634599	0.00687749	-9.22718	2.79841e-20	711973	712005	1709	12498	8135	5293
All_data_analysis_fig2	All_data_analysis_Fig2	DEL	L_PFcm	-0.062144	0.00656011	-9.47301	2.74063e-21	711972	712003	1880	11023	6435	5852
All_data_analysis_fig2	All_data_analysis_Fig2	DEL	L_PoI2	-0.0218183	0.0075552	-2.88785	0.00387915	712013	712044	1264	8396	4748	3816
All_data_analysis_fig2	All_data_analysis_Fig2	DEL	L_TA2	-0.0131183	0.0097235	-1.34914	0.177294	712012	712044	1004	7419	5816	3117
All_data_analysis_fig2	All_data_analysis_Fig2	DEL	L_FOP4	-0.0337809	0.00689862	-4.89676	9.74884e-07	712010	712041	1625	11893	7364	4887
All_data_analysis_fig2	All_data_analysis_Fig2	DEL	L_MI	-0.0122252	0.00740166	-1.65168	0.0986016	712011	712043	1355	9046	5065	4159
All_data_analysis_fig2	All_data_analysis_Fig2	DEL	L_Pir	-0.0389713	0.00659609	-5.90823	3.46226e-09	712006	712037	1594	13751	8961	4712
All_data_analysis_fig2	All_data_analysis_Fig2	DEL	L_AVI	-0.0265139	0.0102484	-2.58711	0.0096789	712013	712044	1218	6272	4399	3830
All_data_analysis_fig2	All_data_analysis_Fig2	DEL	L_AAIC	-0.0120961	0.00992861	-1.21831	0.223108	712012	712043	779	5520	3355	2375
All_data_analysis_fig2	All_data_analysis_Fig2	DEL	L_FOP1	-0.0315534	0.00733087	-4.30418	1.67667e-05	712011	712042	1528	8592	5357	4643
All_data_analysis_fig2	All_data_analysis_Fig2	DEL	L_FOP3	-0.0497695	0.00682308	-7.29428	3.01116e-13	711995	712026	1532	11772	6817	4644
All_data_analysis_fig2	All_data_analysis_Fig2	DEL	L_FOP2	-0.0388188	0.00825822	-4.70063	2.59488e-06	712008	712040	1519	7168	4365	4960
All_data_analysis_fig2	All_data_analysis_Fig2	DEL	L_PFt	-0.07111	0.00847846	-8.38714	5.00583e-17	711977	712009	1622	7928	5014	5126
All_data_analysis_fig2	All_data_analysis_Fig2	DEL	L_AIP	-0.0526354	0.00832533	-6.32233	2.58071e-10	711998	712030	1315	6323	3937	4289
All_data_analysis_fig2	All_data_analysis_Fig2	DEL	L_EC	-0.0368368	0.00751103	-4.90436	9.37885e-07	712009	712040	1729	12042	8964	5102
All_data_analysis_fig2	All_data_analysis_Fig2	DEL	L_PreS	-0.011707	0.00750381	-1.56014	0.118728	712011	712043	1736	11447	8563	5007
All_data_analysis_fig2	All_data_analysis_Fig2	DEL	L_H	-0.0390453	0.00648452	-6.02131	1.73239e-09	712005	712037	1723	14052	9044	5127
All_data_analysis_fig2	All_data_analysis_Fig2	DEL	L_ProS	-0.0457237	0.00937249	-4.8785	1.06957e-06	712006	712038	1064	7755	5629	3321
All_data_analysis_fig2	All_data_analysis_Fig2	DEL	L_PeEc	-0.0438218	0.00721273	-6.07561	1.23686e-09	712003	712034	1403	10581	6544	4427
All_data_analysis_fig2	All_data_analysis_Fig2	DEL	L_STGa	-0.0300274	0.0074858	-4.01126	6.04138e-05	712012	712043	1274	8483	4729	4043
All_data_analysis_fig2	All_data_analysis_Fig2	DEL	L_PBelt	-0.0655857	0.0118034	-5.5565	2.75514e-08	711999	712030	1066	4298	2747	3318
All_data_analysis_fig2	All_data_analysis_Fig2	DEL	L_A5	0.00193639	0.0108209	0.17895	0.857977	712008	712040	903	7032	5932	2869
All_data_analysis_fig2	All_data_analysis_Fig2	DEL	L_PHA1	-0.0143775	0.00856518	-1.6786	0.0932306	712012	712044	1376	7154	4892	4006
All_data_analysis_fig2	All_data_analysis_Fig2	DEL	L_PHA3	-0.011201	0.00763016	-1.46799	0.142109	712011	712042	1277	8910	5347	3993
All_data_analysis_fig2	All_data_analysis_Fig2	DEL	L_STSda	-0.0254403	0.0119845	-2.12278	0.0337735	712013	712044	753	4969	3820	2485
All_data_analysis_fig2	All_data_analysis_Fig2	DEL	L_STSdp	-0.0325639	0.0123079	-2.64576	0.00815123	712012	712044	940	3917	2633	3082
All_data_analysis_fig2	All_data_analysis_Fig2	DEL	L_STSvp	-0.0122956	0.00849979	-1.44658	0.148016	712012	712043	1138	9345	7392	3717
All_data_analysis_fig2	All_data_analysis_Fig2	DEL	L_TGd	-0.027257	0.00748285	-3.6426	0.000269947	712012	712044	1177	7980	4656	3845
All_data_analysis_fig2	All_data_analysis_Fig2	DEL	L_TE1a	-0.0439786	0.0136188	-3.22927	0.00124123	712010	712042	660	3838	3049	2155
All_data_analysis_fig2	All_data_analysis_Fig2	DEL	L_TE1p	-0.042628	0.0186755	-2.28256	0.0224572	712012	712043	474	1898	1385	1537
All_data_analysis_fig2	All_data_analysis_Fig2	DEL	L_TE2a	-0.00191357	0.011956	-0.16005	0.872841	712010	712042	805	5066	3926	2523
All_data_analysis_fig2	All_data_analysis_Fig2	DEL	L_TF	-0.0265847	0.00799747	-3.32414	0.00088704	712013	712044	1033	6909	3757	3350
All_data_analysis_fig2	All_data_analysis_Fig2	DEL	L_TE2p	-0.00939351	0.00987982	-0.950778	0.341718	712011	712043	570	5328	3240	1748
All_data_analysis_fig2	All_data_analysis_Fig2	DEL	L_PHT	0.0147457	0.0114968	1.28259	0.199637	712003	712034	716	6014	5140	2273
All_data_analysis_fig2	All_data_analysis_Fig2	DEL	L_PH	-0.0412401	0.0162923	-2.53126	0.0113659	712012	712043	463	3196	2818	1557
All_data_analysis_fig2	All_data_analysis_Fig2	DEL	L_TPOJ1	-0.0276585	0.0112795	-2.4521	0.0142033	712013	712044	798	5748	4558	2523
All_data_analysis_fig2	All_data_analysis_Fig2	DEL	L_TPOJ2	-0.0243778	0.0109714	-2.22194	0.0262884	712013	712044	694	3744	2601	2209
All_data_analysis_fig2	All_data_analysis_Fig2	DEL	L_TPOJ3	-0.0253246	0.0085339	-2.96753	0.00300233	712013	712044	1195	9530	7492	3816
All_data_analysis_fig2	All_data_analysis_Fig2	DEL	L_DVT	-0.0726346	0.00787102	-9.2281	2.77464e-20	711969	712000	1296	10407	6978	4197
All_data_analysis_fig2	All_data_analysis_Fig2	DEL	L_PGp	-0.0674433	0.00775019	-8.70214	3.27537e-18	711976	712008	1058	8414	5073	3256
All_data_analysis_fig2	All_data_analysis_Fig2	DEL	L_IP2	-0.0671305	0.0100582	-6.67422	2.49057e-11	711992	712023	1135	5524	3359	3668
All_data_analysis_fig2	All_data_analysis_Fig2	DEL	L_IP1	-0.0731244	0.00665596	-10.9863	4.51228e-28	711949	711980	1470	9493	4944	4646
All_data_analysis_fig2	All_data_analysis_Fig2	DEL	L_IP0	-0.0637471	0.00646816	-9.85552	6.5486e-23	711967	711999	1809	12591	7794	5697
All_data_analysis_fig2	All_data_analysis_Fig2	DEL	L_PFop	-0.0775122	0.00973416	-7.9629	1.68731e-15	711979	712010	839	8072	6058	2681
All_data_analysis_fig2	All_data_analysis_Fig2	DEL	L_PF	-0.0930115	0.0117241	-7.93338	2.14107e-15	711975	712006	724	4985	3738	2381
All_data_analysis_fig2	All_data_analysis_Fig2	DEL	L_PFm	-0.0399937	0.0114255	-3.50038	0.000464672	712010	712042	600	2990	1837	1860
All_data_analysis_fig2	All_data_analysis_Fig2	DEL	L_PGi	-0.0459687	0.00814258	-5.64547	1.64907e-08	712004	712035	1454	10914	8519	4579
All_data_analysis_fig2	All_data_analysis_Fig2	DEL	L_PGs	-0.0599093	0.00980978	-6.10709	1.01605e-09	711997	712029	863	7286	5412	2622
All_data_analysis_fig2	All_data_analysis_Fig2	DEL	L_V6A	-0.0265688	0.00715661	-3.71248	0.000205282	712012	712044	1763	10363	7098	5380
All_data_analysis_fig2	All_data_analysis_Fig2	DEL	L_VMV1	-0.0280626	0.00676433	-4.14861	3.34603e-05	712012	712043	1463	10051	6711	4571
All_data_analysis_fig2	All_data_analysis_Fig2	DEL	L_VMV3	-0.0687938	0.0123691	-5.56174	2.67369e-08	711998	712030	918	4914	3720	2779
All_data_analysis_fig2	All_data_analysis_Fig2	DEL	L_PHA2	-0.0412735	0.00726967	-5.6775	1.36826e-08	712005	712037	1542	10980	7087	4736
All_data_analysis_fig2	All_data_analysis_Fig2	DEL	L_V4t	-0.050363	0.00681305	-7.39215	1.44909e-13	711994	712025	2004	13486	9600	6264
All_data_analysis_fig2	All_data_analysis_Fig2	DEL	L_FST	-0.0291147	0.0123331	-2.3607	0.0182411	712013	712044	742	5101	4120	2238
All_data_analysis_fig2	All_data_analysis_Fig2	DEL	L_V3CD	-0.0514354	0.0101574	-5.06383	4.11206e-07	712004	712035	1004	7685	6370	3188
All_data_analysis_fig2	All_data_analysis_Fig2	DEL	L_LO3	-0.0355756	0.00745752	-4.77043	1.83933e-06	712009	712041	1733	11823	8757	5147
All_data_analysis_fig2	All_data_analysis_Fig2	DEL	L_VMV2	-0.0647923	0.0100923	-6.41999	1.36518e-10	711994	712026	1050	7337	5486	3410
All_data_analysis_fig2	All_data_analysis_Fig2	DEL	L_31pd	-0.0744474	0.0126207	-5.89885	3.66495e-09	711995	712027	966	4561	3303	2882
All_data_analysis_fig2	All_data_analysis_Fig2	DEL	L_31a	-0.0269153	0.0111654	-2.4106	0.015927	712013	712044	801	4849	3505	2527
All_data_analysis_fig2	All_data_analysis_Fig2	DEL	L_VVC	-0.0286463	0.0078891	-3.63112	0.000282244	712012	712044	1416	7760	4962	4232
All_data_analysis_fig2	All_data_analysis_Fig2	DEL	L_25	-0.0119871	0.00901079	-1.3303	0.18342	712012	712043	1204	7356	5349	3760
All_data_analysis_fig2	All_data_analysis_Fig2	DEL	L_s32	-0.0391888	0.00651876	-6.0117	1.83835e-09	712005	712037	1867	9655	5562	6061
All_data_analysis_fig2	All_data_analysis_Fig2	DEL	L_pOFC	-0.030416	0.00725875	-4.19025	2.7874e-05	712011	712043	1687	9696	6257	5171
All_data_analysis_fig2	All_data_analysis_Fig2	DEL	L_PoI1	-0.0227321	0.0067264	-3.37954	0.000726188	712013	712044	1547	10669	6311	4560
All_data_analysis_fig2	All_data_analysis_Fig2	DEL	L_Ig	-0.0327289	0.00781709	-4.18684	2.82954e-05	712011	712042	1269	8212	4928	4075
All_data_analysis_fig2	All_data_analysis_Fig2	DEL	L_FOP5	-0.0531111	0.00718856	-7.38828	1.49184e-13	711993	712024	1649	9332	5708	4984
All_data_analysis_fig2	All_data_analysis_Fig2	DEL	L_p10p	-0.046468	0.00848154	-5.47873	4.28793e-08	712004	712035	1432	8585	6200	4318
All_data_analysis_fig2	All_data_analysis_Fig2	DEL	L_p47r	-0.0457469	0.00746488	-6.12829	8.8958e-10	712002	712033	1309	8422	5986	4004
All_data_analysis_fig2	All_data_analysis_Fig2	DEL	L_TGv	-0.0222703	0.00727829	-3.05983	0.00221487	712013	712044	1322	8931	5019	4275
All_data_analysis_fig2	All_data_analysis_Fig2	DEL	L_MBelt	-0.0199283	0.00814085	-2.44794	0.0143682	712013	712044	1106	8148	5087	3300
All_data_analysis_fig2	All_data_analysis_Fig2	DEL	L_LBelt	-0.0527016	0.00678588	-7.76636	8.1066e-15	711991	712022	1873	11688	7871	5582
All_data_analysis_fig2	All_data_analysis_Fig2	DEL	L_A4	-0.0241095	0.0142025	-1.69755	0.0895937	712013	712044	811	3452	2408	2511
All_data_analysis_fig2	All_data_analysis_Fig2	DEL	L_STSva	-0.0473968	0.00843017	-5.62228	1.88646e-08	712003	712035	1435	8971	6242	4464
All_data_analysis_fig2	All_data_analysis_Fig2	DEL	L_TE1m	-0.0204046	0.00987278	-2.06675	0.0387588	712013	712044	786	5515	4055	2596
All_data_analysis_fig2	All_data_analysis_Fig2	DEL	L_PI	-0.0210179	0.00771847	-2.72307	0.00646833	712013	712044	1284	8550	5169	3986
All_data_analysis_fig2	All_data_analysis_Fig2	DEL	L_a32pr	-0.026945	0.00736846	-3.6568	0.000255434	712012	712044	1621	9455	6362	4905
All_data_analysis_fig2	All_data_analysis_Fig2	DEL	L_p24	-0.0279286	0.00712504	-3.91978	8.86519e-05	712012	712044	1529	11157	7830	4816
All_data_analysis_fig2	All_data_analysis_Fig2	DUP	L_V1	-0.0225689	0.00473595	-4.76545	1.88536e-06	712016	712047	2945	25972	13503	4771
All_data_analysis_fig2	All_data_analysis_Fig2	DUP	L_MST	-0.0181789	0.007323	-2.48244	0.0130491	712022	712053	1691	13730	8329	2726
All_data_analysis_fig2	All_data_analysis_Fig2	DUP	L_V6	-0.0227464	0.00411954	-5.5216	3.36254e-08	712013	712045	3213	30043	14880	5098
All_data_analysis_fig2	All_data_analysis_Fig2	DUP	L_V2	-0.0169967	0.00449451	-3.78166	0.000155824	712021	712052	2765	25682	12664	4471
All_data_analysis_fig2	All_data_analysis_Fig2	DUP	L_V3	-0.0176906	0.00527207	-3.35554	0.000792223	712021	712052	2156	17073	9020	3524
All_data_analysis_fig2	All_data_analysis_Fig2	DUP	L_V4	-0.00851352	0.00536944	-1.58555	0.112842	712023	712054	2675	24545	12653	4253
All_data_analysis_fig2	All_data_analysis_Fig2	DUP	L_V8	-0.0201287	0.00521576	-3.85921	0.000113782	712019	712051	2929	22127	11444	4661
All_data_analysis_fig2	All_data_analysis_Fig2	DUP	L_4	-0.00567594	0.00473297	-1.19923	0.230438	712022	712054	2397	24541	12212	3796
All_data_analysis_fig2	All_data_analysis_Fig2	DUP	L_3b	-0.0129345	0.00520728	-2.48393	0.0129949	712023	712054	2505	21641	11597	3956
All_data_analysis_fig2	All_data_analysis_Fig2	DUP	L_FEF	-0.00908135	0.00653227	-1.39023	0.164461	712023	712054	1978	17119	9976	3077
All_data_analysis_fig2	All_data_analysis_Fig2	DUP	L_PEF	-0.0210027	0.00383184	-5.48111	4.23063e-08	712015	712046	4099	35773	15645	6484
All_data_analysis_fig2	All_data_analysis_Fig2	DUP	L_55b	-0.0386545	0.00483028	-8.00254	1.22375e-15	711987	712018	2849	25631	13904	4537
All_data_analysis_fig2	All_data_analysis_Fig2	DUP	L_V3A	-0.0227779	0.00520365	-4.3773	1.20205e-05	712017	712048	2718	23961	12841	4378
All_data_analysis_fig2	All_data_analysis_Fig2	DUP	L_RSC	-0.00928911	0.00689765	-1.34671	0.178076	712023	712054	1723	15240	8441	2739
All_data_analysis_fig2	All_data_analysis_Fig2	DUP	L_POS2	-0.0306739	0.00624683	-4.91032	9.09839e-07	712012	712043	1975	17509	10792	3174
All_data_analysis_fig2	All_data_analysis_Fig2	DUP	L_V7	-0.026743	0.0042894	-6.23467	4.53426e-10	712007	712039	3754	31329	16540	5969
All_data_analysis_fig2	All_data_analysis_Fig2	DUP	L_IPS1	-0.0234363	0.00369905	-6.33576	2.36558e-10	712009	712041	3368	30781	14525	5406
All_data_analysis_fig2	All_data_analysis_Fig2	DUP	L_FFC	-0.0297673	0.00456878	-6.51538	7.26368e-11	712004	712035	2439	20252	9241	3953
All_data_analysis_fig2	All_data_analysis_Fig2	DUP	L_V3B	-0.00979165	0.003961	-2.47202	0.013436	712023	712054	3628	30917	14771	5742
All_data_analysis_fig2	All_data_analysis_Fig2	DUP	L_LO1	-0.023503	0.0033304	-7.0571	1.70433e-12	712006	712037	3752	35262	15252	6039
All_data_analysis_fig2	All_data_analysis_Fig2	DUP	L_LO2	-0.0195529	0.0038535	-5.07406	3.89682e-07	712017	712048	3599	34482	16835	5825
All_data_analysis_fig2	All_data_analysis_Fig2	DUP	L_PIT	-0.0172065	0.00452083	-3.80606	0.000141233	712021	712052	3100	26938	14938	4996
All_data_analysis_fig2	All_data_analysis_Fig2	DUP	L_MT	-0.011406	0.00397548	-2.86908	0.00411706	712023	712054	3252	31173	13912	5198
All_data_analysis_fig2	All_data_analysis_Fig2	DUP	L_A1	-0.015146	0.00482627	-3.13825	0.00169981	712022	712053	3264	30645	16185	5125
All_data_analysis_fig2	All_data_analysis_Fig2	DUP	L_PSL	-0.0350015	0.00859375	-4.07291	4.64442e-05	712015	712046	1385	9885	6478	2230
All_data_analysis_fig2	All_data_analysis_Fig2	DUP	L_SFL	-0.0139793	0.00780419	-1.79126	0.0732524	712023	712054	1696	12444	8893	2694
All_data_analysis_fig2	All_data_analysis_Fig2	DUP	L_PCV	-0.00959222	0.00833637	-1.15065	0.249879	712023	712054	1393	12126	8181	2231
All_data_analysis_fig2	All_data_analysis_Fig2	DUP	L_STV	-0.0511015	0.00704171	-7.25697	3.96971e-13	711989	712020	1400	13474	8724	2323
All_data_analysis_fig2	All_data_analysis_Fig2	DUP	L_7Pm	-0.012751	0.0060336	-2.11332	0.0345741	712023	712054	2093	19370	11432	3375
All_data_analysis_fig2	All_data_analysis_Fig2	DUP	L_7m	-0.0229451	0.00691547	-3.31793	0.000906983	712020	712051	1310	15187	9538	2067
All_data_analysis_fig2	All_data_analysis_Fig2	DUP	L_POS1	-0.0252826	0.00683621	-3.69834	0.000217062	712018	712049	1611	14470	9588	2677
All_data_analysis_fig2	All_data_analysis_Fig2	DUP	L_23d	-0.0236281	0.00358655	-6.58799	4.4666e-11	712008	712039	3544	33391	14717	5693
All_data_analysis_fig2	All_data_analysis_Fig2	DUP	L_v23ab	-0.0310273	0.00473463	-6.55327	5.63965e-11	712003	712034	2634	23491	12949	4163
All_data_analysis_fig2	All_data_analysis_Fig2	DUP	L_d23ab	-0.020691	0.00517552	-3.99786	6.39351e-05	712019	712050	2862	24332	12291	4570
All_data_analysis_fig2	All_data_analysis_Fig2	DUP	L_31pv	-0.0205157	0.00559325	-3.66793	0.000244571	712020	712051	2001	18948	9392	3275
All_data_analysis_fig2	All_data_analysis_Fig2	DUP	L_5m	-0.0177432	0.00587536	-3.01993	0.00252856	712021	712053	2226	22305	12881	3496
All_data_analysis_fig2	All_data_analysis_Fig2	DUP	L_5mv	-0.0116694	0.00563857	-2.06957	0.0384939	712023	712054	2583	21801	12370	4157
All_data_analysis_fig2	All_data_analysis_Fig2	DUP	L_23c	-0.0384268	0.00675438	-5.68918	1.27791e-08	712005	712037	1663	15549	9446	2643
All_data_analysis_fig2	All_data_analysis_Fig2	DUP	L_5L	-0.0197237	0.0040813	-4.83271	1.34764e-06	712017	712049	3097	27221	12848	4896
All_data_analysis_fig2	All_data_analysis_Fig2	DUP	L_24dd	-0.0294056	0.00499596	-5.88588	3.96425e-09	712008	712039	2392	23960	13618	3833
All_data_analysis_fig2	All_data_analysis_Fig2	DUP	L_24dv	-0.0303773	0.00723787	-4.197	2.70564e-05	712015	712047	1644	13871	9246	2618
All_data_analysis_fig2	All_data_analysis_Fig2	DUP	L_7AL	-0.0172657	0.00593989	-2.90673	0.00365254	712022	712053	1813	18530	10011	2869
All_data_analysis_fig2	All_data_analysis_Fig2	DUP	L_SCEF	-0.00465175	0.00702456	-0.662213	0.507836	712022	712054	1893	15105	9526	3002
All_data_analysis_fig2	All_data_analysis_Fig2	DUP	L_6ma	-0.0182155	0.00498637	-3.65306	0.000259184	712020	712052	3002	26593	13216	4607
All_data_analysis_fig2	All_data_analysis_Fig2	DUP	L_7Am	-0.0128872	0.00606197	-2.12592	0.0335112	712023	712054	1830	15253	9118	2979
All_data_analysis_fig2	All_data_analysis_Fig2	DUP	L_7PL	-0.00877673	0.00571827	-1.53486	0.12482	712023	712054	2529	20478	11610	4053
All_data_analysis_fig2	All_data_analysis_Fig2	DUP	L_7PC	-0.0359485	0.00519768	-6.91625	4.64812e-12	711998	712029	2213	19186	9533	3639
All_data_analysis_fig2	All_data_analysis_Fig2	DUP	L_LIPv	-0.0201869	0.005482	-3.68239	0.000231104	712020	712051	2180	18261	9721	3453
All_data_analysis_fig2	All_data_analysis_Fig2	DUP	L_VIP	-0.0217388	0.00470135	-4.62394	3.76694e-06	712017	712048	2946	25325	12274	4700
All_data_analysis_fig2	All_data_analysis_Fig2	DUP	L_MIP	-0.0146503	0.00482487	-3.03642	0.00239429	712022	712054	2698	26521	12957	4280
All_data_analysis_fig2	All_data_analysis_Fig2	DUP	L_1	-0.0364133	0.00521757	-6.97898	2.98051e-12	711997	712028	2505	20880	10897	3968
All_data_analysis_fig2	All_data_analysis_Fig2	DUP	L_2	-0.0212625	0.00608016	-3.49703	0.000470554	712020	712051	1898	17175	9758	3025
All_data_analysis_fig2	All_data_analysis_Fig2	DUP	L_3a	-0.0124962	0.0045262	-2.76086	0.00576527	712023	712054	3026	27087	12789	4748
All_data_analysis_fig2	All_data_analysis_Fig2	DUP	L_6d	-0.00908846	0.00516384	-1.76002	0.0784058	712023	712054	2438	22986	11361	3804
All_data_analysis_fig2	All_data_analysis_Fig2	DUP	L_6mp	-0.0260778	0.0054268	-4.80537	1.54551e-06	712014	712046	2436	20734	10120	3823
All_data_analysis_fig2	All_data_analysis_Fig2	DUP	L_6v	-0.0313768	0.00650983	-4.81991	1.43702e-06	712012	712044	2316	18975	11575	3644
All_data_analysis_fig2	All_data_analysis_Fig2	DUP	L_p24pr	-0.00569735	0.00453453	-1.25644	0.208959	712022	712054	3251	30504	14442	5057
All_data_analysis_fig2	All_data_analysis_Fig2	DUP	L_33pr	-0.00445093	0.00388401	-1.14596	0.251812	712021	712052	3227	29181	13528	5049
All_data_analysis_fig2	All_data_analysis_Fig2	DUP	L_a24pr	-0.0204708	0.00373623	-5.479	4.28139e-08	712015	712046	3440	31566	13116	5464
All_data_analysis_fig2	All_data_analysis_Fig2	DUP	L_p32pr	-0.023531	0.00346143	-6.79806	1.06266e-11	712007	712038	3627	32612	14766	5763
All_data_analysis_fig2	All_data_analysis_Fig2	DUP	L_a24	-0.0299353	0.00495334	-6.04346	1.51048e-09	712007	712038	2718	24028	12035	4370
All_data_analysis_fig2	All_data_analysis_Fig2	DUP	L_d32	-0.0160642	0.00488821	-3.28632	0.0010152	712022	712053	2993	24144	12454	4671
All_data_analysis_fig2	All_data_analysis_Fig2	DUP	L_8BM	-0.0410276	0.00526898	-7.78664	6.90689e-15	711988	712019	2638	21585	11655	4187
All_data_analysis_fig2	All_data_analysis_Fig2	DUP	L_p32	-0.0201125	0.00353165	-5.69494	1.2355e-08	712015	712046	3752	34937	15510	5901
All_data_analysis_fig2	All_data_analysis_Fig2	DUP	L_10r	-0.0335844	0.00569375	-5.89847	3.67349e-09	712006	712037	2382	21528	11194	3786
All_data_analysis_fig2	All_data_analysis_Fig2	DUP	L_47m	-0.0147877	0.00413612	-3.57526	0.000349938	712022	712053	3261	30762	14977	5198
All_data_analysis_fig2	All_data_analysis_Fig2	DUP	L_8Av	-0.00733937	0.00597055	-1.22926	0.218975	712023	712054	2129	19992	10630	3350
All_data_analysis_fig2	All_data_analysis_Fig2	DUP	L_8Ad	-0.0228233	0.00378996	-6.02203	1.72474e-09	712011	712043	2845	26695	13775	4485
All_data_analysis_fig2	All_data_analysis_Fig2	DUP	L_9m	-0.0365537	0.00413151	-8.84754	9.00158e-19	711980	712012	2511	21715	11088	3925
All_data_analysis_fig2	All_data_analysis_Fig2	DUP	L_8BL	-0.0169225	0.00650835	-2.60013	0.00931943	712022	712053	1420	12755	7147	2179
All_data_analysis_fig2	All_data_analysis_Fig2	DUP	L_9p	-0.0205073	0.00375028	-5.46822	4.54999e-08	712015	712046	2754	25466	11043	4395
All_data_analysis_fig2	All_data_analysis_Fig2	DUP	L_10d	-0.0217468	0.0033405	-6.51003	7.52719e-11	712010	712041	3745	34500	16072	5878
All_data_analysis_fig2	All_data_analysis_Fig2	DUP	L_8C	-0.0238054	0.00562369	-4.23305	2.30626e-05	712017	712048	2423	21716	12736	3847
All_data_analysis_fig2	All_data_analysis_Fig2	DUP	L_44	-0.0324284	0.00395833	-8.19244	2.57142e-16	711990	712021	2348	21974	10599	3752
All_data_analysis_fig2	All_data_analysis_Fig2	DUP	L_45	-0.0200621	0.00546444	-3.67139	0.000241287	712020	712051	2654	26251	15127	4120
All_data_analysis_fig2	All_data_analysis_Fig2	DUP	L_47l	-0.0286227	0.00449728	-6.36445	1.9632e-10	712005	712037	2995	27782	13354	4744
All_data_analysis_fig2	All_data_analysis_Fig2	DUP	L_a47r	-0.0236528	0.00811643	-2.91418	0.0035665	712020	712052	1038	9506	6027	1606
All_data_analysis_fig2	All_data_analysis_Fig2	DUP	L_6r	-0.0185092	0.00421663	-4.38957	1.13618e-05	712019	712050	2977	31730	15496	4608
All_data_analysis_fig2	All_data_analysis_Fig2	DUP	L_IFJa	-0.0195319	0.00353786	-5.52084	3.37702e-08	712016	712047	3775	35456	15750	5984
All_data_analysis_fig2	All_data_analysis_Fig2	DUP	L_IFJp	-0.0213537	0.00454837	-4.69481	2.6699e-06	712017	712048	3284	29294	16102	5065
All_data_analysis_fig2	All_data_analysis_Fig2	DUP	L_IFSp	-0.0265983	0.00540107	-4.92463	8.45718e-07	712014	712045	2437	18974	9983	3920
All_data_analysis_fig2	All_data_analysis_Fig2	DUP	L_IFSa	-0.0291138	0.00303849	-9.58169	9.62716e-22	711981	712012	3780	32418	14467	6066
All_data_analysis_fig2	All_data_analysis_Fig2	DUP	L_p9.46v	-0.0245516	0.00251134	-9.77628	1.43637e-22	711986	712017	4430	40993	17740	7065
All_data_analysis_fig2	All_data_analysis_Fig2	DUP	L_46	-0.0311057	0.00323938	-9.60238	7.87783e-22	711978	712009	3160	29135	13085	5044
All_data_analysis_fig2	All_data_analysis_Fig2	DUP	L_a9.46v	-0.0259469	0.00475278	-5.45931	4.78423e-08	712012	712043	2528	24167	11850	4007
All_data_analysis_fig2	All_data_analysis_Fig2	DUP	L_9.46d	-0.0315146	0.00412386	-7.64203	2.14562e-14	711995	712026	2693	24836	11416	4315
All_data_analysis_fig2	All_data_analysis_Fig2	DUP	L_9a	-0.0254382	0.00778142	-3.2691	0.00107905	712019	712051	1522	14028	10087	2460
All_data_analysis_fig2	All_data_analysis_Fig2	DUP	L_10v	-0.0298063	0.00380015	-7.84345	4.40008e-15	711995	712026	2799	25752	13818	4521
All_data_analysis_fig2	All_data_analysis_Fig2	DUP	L_a10p	-0.0247359	0.0039275	-6.29813	3.01732e-10	712009	712040	3720	32766	15895	5923
All_data_analysis_fig2	All_data_analysis_Fig2	DUP	L_10pp	-0.022381	0.00366242	-6.11099	9.9157e-10	712011	712043	2482	24709	12666	3946
All_data_analysis_fig2	All_data_analysis_Fig2	DUP	L_11l	-0.0142647	0.00658489	-2.16627	0.0302914	712023	712054	1802	16243	10357	2813
All_data_analysis_fig2	All_data_analysis_Fig2	DUP	L_13l	-0.041886	0.00598135	-7.00276	2.51586e-12	711994	712026	1827	14474	8147	2996
All_data_analysis_fig2	All_data_analysis_Fig2	DUP	L_OFC	-0.0307652	0.00416667	-7.38364	1.54474e-13	711997	712029	2187	21204	11617	3485
All_data_analysis_fig2	All_data_analysis_Fig2	DUP	L_47s	-0.0199597	0.00636068	-3.13798	0.00170137	712021	712052	1963	16605	10654	3056
All_data_analysis_fig2	All_data_analysis_Fig2	DUP	L_LIPd	-0.0203494	0.00500732	-4.06394	4.82657e-05	712019	712050	2792	23330	12588	4486
All_data_analysis_fig2	All_data_analysis_Fig2	DUP	L_6a	-0.0220785	0.00683664	-3.22943	0.00124052	712020	712051	1634	14001	8164	2593
All_data_analysis_fig2	All_data_analysis_Fig2	DUP	L_i6.8	-0.0210577	0.00481913	-4.36962	1.24513e-05	712018	712049	2042	17731	8713	3228
All_data_analysis_fig2	All_data_analysis_Fig2	DUP	L_s6.8	-0.0302402	0.00438741	-6.8925	5.49455e-12	712001	712033	2556	22743	12246	4020
All_data_analysis_fig2	All_data_analysis_Fig2	DUP	L_43	-0.0337322	0.0045239	-7.45645	8.91615e-14	711995	712026	2132	22450	12854	3394
All_data_analysis_fig2	All_data_analysis_Fig2	DUP	L_OP4	-0.0160037	0.00609979	-2.62365	0.00869984	712022	712054	1652	13163	7646	2663
All_data_analysis_fig2	All_data_analysis_Fig2	DUP	L_OP1	-0.0125999	0.0105634	-1.19279	0.232952	712023	712054	987	8056	6786	1609
All_data_analysis_fig2	All_data_analysis_Fig2	DUP	L_OP2.3	-0.0281731	0.0041404	-6.80444	1.01662e-11	712003	712035	3468	29495	14394	5635
All_data_analysis_fig2	All_data_analysis_Fig2	DUP	L_52	-0.0246678	0.0042997	-5.73709	9.64233e-09	712011	712043	2757	27523	12688	4344
All_data_analysis_fig2	All_data_analysis_Fig2	DUP	L_RI	-0.0283931	0.00438859	-6.46977	9.83292e-11	712005	712036	3269	31296	15448	5293
All_data_analysis_fig2	All_data_analysis_Fig2	DUP	L_PFcm	-0.0238435	0.00347243	-6.86651	6.59397e-12	712006	712038	3590	32269	14300	5852
All_data_analysis_fig2	All_data_analysis_Fig2	DUP	L_PoI2	-0.0227184	0.00514966	-4.41164	1.02632e-05	712017	712048	2415	21608	12278	3816
All_data_analysis_fig2	All_data_analysis_Fig2	DUP	L_TA2	-0.0258209	0.00559215	-4.61734	3.88871e-06	712015	712046	1951	16975	9120	3117
All_data_analysis_fig2	All_data_analysis_Fig2	DUP	L_FOP4	-0.0288945	0.0049939	-5.78595	7.21865e-09	712008	712040	3086	28771	16023	4887
All_data_analysis_fig2	All_data_analysis_Fig2	DUP	L_MI	-0.02923	0.00548748	-5.32667	1.00113e-07	712011	712042	2630	20702	11802	4159
All_data_analysis_fig2	All_data_analysis_Fig2	DUP	L_Pir	-0.008704	0.00418288	-2.08086	0.0374473	712023	712054	3016	27321	14641	4712
All_data_analysis_fig2	All_data_analysis_Fig2	DUP	L_AVI	-0.0404475	0.00565022	-7.15857	8.17395e-13	711994	712025	2422	21749	12363	3830
All_data_analysis_fig2	All_data_analysis_Fig2	DUP	L_AAIC	-0.0236419	0.00757995	-3.11901	0.00181479	712020	712051	1520	13151	9320	2375
All_data_analysis_fig2	All_data_analysis_Fig2	DUP	L_FOP1	-0.0298888	0.00409923	-7.29132	3.07815e-13	711999	712030	2905	26352	13134	4643
All_data_analysis_fig2	All_data_analysis_Fig2	DUP	L_FOP3	-0.0237875	0.00453278	-5.24787	1.5399e-07	712014	712045	2918	26215	12997	4644
All_data_analysis_fig2	All_data_analysis_Fig2	DUP	L_FOP2	-0.0226551	0.00462023	-4.90344	9.42282e-07	712015	712047	3099	25321	12795	4960
All_data_analysis_fig2	All_data_analysis_Fig2	DUP	L_PFt	-0.0268364	0.00477335	-5.62212	1.88819e-08	712010	712042	3197	29068	14772	5126
All_data_analysis_fig2	All_data_analysis_Fig2	DUP	L_AIP	-0.0273308	0.0043271	-6.3162	2.685e-10	712007	712038	2691	22395	9773	4289
All_data_analysis_fig2	All_data_analysis_Fig2	DUP	L_EC	-0.0109937	0.00423389	-2.5966	0.00941572	712023	712054	3275	28202	14441	5102
All_data_analysis_fig2	All_data_analysis_Fig2	DUP	L_PreS	-0.0101379	0.00417343	-2.42916	0.0151344	712023	712054	3170	28615	13516	5007
All_data_analysis_fig2	All_data_analysis_Fig2	DUP	L_H	-0.00925172	0.00462158	-2.00185	0.045302	712023	712054	3259	27859	14053	5127
All_data_analysis_fig2	All_data_analysis_Fig2	DUP	L_ProS	-0.0239326	0.0061603	-3.88497	0.000102368	712018	712049	2045	18911	10476	3321
All_data_analysis_fig2	All_data_analysis_Fig2	DUP	L_PeEc	-0.0131646	0.00449913	-2.92602	0.00343354	712023	712054	2802	27235	13297	4427
All_data_analysis_fig2	All_data_analysis_Fig2	DUP	L_STGa	-0.0385138	0.00504335	-7.63655	2.23885e-14	711990	712022	2515	21971	12259	4043
All_data_analysis_fig2	All_data_analysis_Fig2	DUP	L_PBelt	-0.00829759	0.0055692	-1.48991	0.13625	712023	712054	2065	18773	9541	3318
All_data_analysis_fig2	All_data_analysis_Fig2	DUP	L_A5	-0.0392708	0.00686965	-5.71656	1.08823e-08	712005	712036	1819	15209	8631	2869
All_data_analysis_fig2	All_data_analysis_Fig2	DUP	L_PHA1	-0.00766589	0.00403515	-1.89978	0.0574633	712023	712054	2535	21084	10177	4006
All_data_analysis_fig2	All_data_analysis_Fig2	DUP	L_PHA3	-0.0253348	0.00518013	-4.89077	1.00503e-06	712014	712046	2482	23801	11419	3993
All_data_analysis_fig2	All_data_analysis_Fig2	DUP	L_STSda	-0.0312557	0.00668482	-4.67563	2.93206e-06	712013	712044	1570	16013	9824	2485
All_data_analysis_fig2	All_data_analysis_Fig2	DUP	L_STSdp	-0.0483137	0.00642543	-7.51914	5.53161e-14	711987	712018	1865	15142	9312	3082
All_data_analysis_fig2	All_data_analysis_Fig2	DUP	L_STSvp	-0.03956	0.00541788	-7.30175	2.84852e-13	711993	712024	2320	19790	11384	3717
All_data_analysis_fig2	All_data_analysis_Fig2	DUP	L_TGd	-0.0282635	0.00477861	-5.91459	3.33119e-09	712008	712040	2432	23670	11849	3845
All_data_analysis_fig2	All_data_analysis_Fig2	DUP	L_TE1a	-0.0262908	0.00770408	-3.41258	0.000643613	712019	712050	1372	12418	7305	2155
All_data_analysis_fig2	All_data_analysis_Fig2	DUP	L_TE1p	-0.066106	0.00978856	-6.75339	1.44729e-11	711990	712021	943	7773	5167	1537
All_data_analysis_fig2	All_data_analysis_Fig2	DUP	L_TE2a	-0.0237117	0.00619695	-3.82635	0.000130085	712018	712050	1617	14732	8258	2523
All_data_analysis_fig2	All_data_analysis_Fig2	DUP	L_TF	-0.0301969	0.00458993	-6.57895	4.74696e-11	712003	712035	2074	22031	10727	3350
All_data_analysis_fig2	All_data_analysis_Fig2	DUP	L_TE2p	-0.0306022	0.00737061	-4.15192	3.29804e-05	712015	712047	1110	10798	6804	1748
All_data_analysis_fig2	All_data_analysis_Fig2	DUP	L_PHT	-0.0416329	0.00736293	-5.6544	1.56556e-08	712004	712036	1391	14029	8857	2273
All_data_analysis_fig2	All_data_analysis_Fig2	DUP	L_PH	-0.00352959	0.00903118	-0.390823	0.695929	712023	712054	961	10806	8032	1557
All_data_analysis_fig2	All_data_analysis_Fig2	DUP	L_TPOJ1	-0.0278578	0.00694653	-4.01032	6.06533e-05	712016	712048	1558	13903	7692	2523
All_data_analysis_fig2	All_data_analysis_Fig2	DUP	L_TPOJ2	-0.0312038	0.0073739	-4.23165	2.3206e-05	712015	712046	1408	12124	7281	2209
All_data_analysis_fig2	All_data_analysis_Fig2	DUP	L_TPOJ3	-0.0196026	0.00486713	-4.02754	5.63794e-05	712019	712051	2354	23051	11907	3816
All_data_analysis_fig2	All_data_analysis_Fig2	DUP	L_DVT	-0.0121109	0.0052523	-2.30583	0.0211207	712023	712054	2602	23503	11520	4197
All_data_analysis_fig2	All_data_analysis_Fig2	DUP	L_PGp	-0.0209525	0.00522256	-4.01192	6.02438e-05	712019	712050	2028	20694	10645	3256
All_data_analysis_fig2	All_data_analysis_Fig2	DUP	L_IP2	-0.0301436	0.0047917	-6.29079	3.1635e-10	712005	712036	2297	19355	9251	3668
All_data_analysis_fig2	All_data_analysis_Fig2	DUP	L_IP1	-0.0194198	0.00436317	-4.45084	8.55697e-06	712018	712050	2898	25698	12495	4646
All_data_analysis_fig2	All_data_analysis_Fig2	DUP	L_IP0	-0.0195109	0.0037843	-5.15576	2.52794e-07	712017	712048	3512	31161	14064	5697
All_data_analysis_fig2	All_data_analysis_Fig2	DUP	L_PFop	0.00162742	0.00553925	0.293797	0.768913	712019	712050	1703	17991	9772	2681
All_data_analysis_fig2	All_data_analysis_Fig2	DUP	L_PF	-0.0380991	0.00692786	-5.49941	3.81425e-08	712006	712038	1444	12891	7768	2381
All_data_analysis_fig2	All_data_analysis_Fig2	DUP	L_PFm	-0.0336711	0.00724131	-4.64986	3.3232e-06	712012	712044	1138	12437	7490	1860
All_data_analysis_fig2	All_data_analysis_Fig2	DUP	L_PGi	-0.0339298	0.00491918	-6.89744	5.30683e-12	711999	712030	2916	26236	14045	4579
All_data_analysis_fig2	All_data_analysis_Fig2	DUP	L_PGs	-0.0239706	0.00728224	-3.29166	0.000996123	712019	712051	1615	13665	8735	2622
All_data_analysis_fig2	All_data_analysis_Fig2	DUP	L_V6A	-0.028349	0.00472232	-6.0032	1.93717e-09	712008	712039	3346	27386	13607	5380
All_data_analysis_fig2	All_data_analysis_Fig2	DUP	L_VMV1	-0.0170791	0.00379219	-4.50375	6.67935e-06	712020	712051	2851	25211	10297	4571
All_data_analysis_fig2	All_data_analysis_Fig2	DUP	L_VMV3	-0.018097	0.00605985	-2.98638	0.00282327	712021	712053	1731	15432	9159	2779
All_data_analysis_fig2	All_data_analysis_Fig2	DUP	L_PHA2	-0.0177673	0.00492912	-3.60456	0.000312741	712021	712052	2969	27758	14597	4736
All_data_analysis_fig2	All_data_analysis_Fig2	DUP	L_V4t	-0.0164564	0.00402886	-4.08464	4.4159e-05	712020	712052	3972	35504	16352	6264
All_data_analysis_fig2	All_data_analysis_Fig2	DUP	L_FST	-0.0369499	0.00846871	-4.3631	1.28279e-05	712013	712044	1368	10906	7540	2238
All_data_analysis_fig2	All_data_analysis_Fig2	DUP	L_V3CD	-0.0228203	0.00651058	-3.50511	0.000456496	712019	712051	1950	16237	9786	3188
All_data_analysis_fig2	All_data_analysis_Fig2	DUP	L_LO3	-0.0124334	0.00438075	-2.83819	0.00453733	712023	712054	3222	26170	14055	5147
All_data_analysis_fig2	All_data_analysis_Fig2	DUP	L_VMV2	-0.010383	0.0055832	-1.85969	0.0629307	712023	712054	2109	19516	9766	3410
All_data_analysis_fig2	All_data_analysis_Fig2	DUP	L_31pd	-0.016996	0.00588353	-2.88875	0.00386808	712022	712053	1865	16953	9508	2882
All_data_analysis_fig2	All_data_analysis_Fig2	DUP	L_31a	-0.0314504	0.00688768	-4.56619	4.96907e-06	712013	712045	1572	14019	7626	2527
All_data_analysis_fig2	All_data_analysis_Fig2	DUP	L_VVC	-0.0156205	0.00404013	-3.86634	0.000110507	712021	712053	2666	21378	9336	4232
All_data_analysis_fig2	All_data_analysis_Fig2	DUP	L_25	-0.0306893	0.0058043	-5.28733	1.24214e-07	712010	712042	2369	19918	10972	3760
All_data_analysis_fig2	All_data_analysis_Fig2	DUP	L_s32	-0.0284406	0.00332444	-8.55498	1.18516e-17	711991	712022	3792	33585	15028	6061
All_data_analysis_fig2	All_data_analysis_Fig2	DUP	L_pOFC	-0.0205194	0.00424807	-4.83028	1.36422e-06	712017	712048	3313	27097	12919	5171
All_data_analysis_fig2	All_data_analysis_Fig2	DUP	L_PoI1	-0.0161245	0.0047656	-3.38352	0.000715739	712021	712053	2885	25046	13018	4560
All_data_analysis_fig2	All_data_analysis_Fig2	DUP	L_Ig	-0.0247165	0.00423065	-5.84224	5.15643e-09	712011	712042	2551	23762	11722	4075
All_data_analysis_fig2	All_data_analysis_Fig2	DUP	L_FOP5	-0.00622479	0.00431037	-1.44414	0.1487	712022	712054	3217	28118	13390	4984
All_data_analysis_fig2	All_data_analysis_Fig2	DUP	L_p10p	-0.0202837	0.00378017	-5.36581	8.06568e-08	712015	712047	2739	25540	12736	4318
All_data_analysis_fig2	All_data_analysis_Fig2	DUP	L_p47r	-0.0211442	0.00461324	-4.58337	4.57748e-06	712017	712049	2556	23962	12314	4004
All_data_analysis_fig2	All_data_analysis_Fig2	DUP	L_TGv	-0.02276	0.00435564	-5.22542	1.73898e-07	712014	712046	2676	26614	12462	4275
All_data_analysis_fig2	All_data_analysis_Fig2	DUP	L_MBelt	-0.0100689	0.0052278	-1.92603	0.0541019	712023	712054	2046	20370	10542	3300
All_data_analysis_fig2	All_data_analysis_Fig2	DUP	L_LBelt	-0.00552902	0.00416768	-1.32664	0.184628	712022	712053	3552	29901	15223	5582
All_data_analysis_fig2	All_data_analysis_Fig2	DUP	L_A4	-0.0339453	0.00765806	-4.43262	9.31335e-06	712013	712045	1555	13961	8676	2511
All_data_analysis_fig2	All_data_analysis_Fig2	DUP	L_STSva	-0.020561	0.00420199	-4.89316	9.92915e-07	712017	712048	2815	25863	12254	4464
All_data_analysis_fig2	All_data_analysis_Fig2	DUP	L_TE1m	-0.0477092	0.00609769	-7.82416	5.12991e-15	711984	712016	1622	17415	10818	2596
All_data_analysis_fig2	All_data_analysis_Fig2	DUP	L_PI	-0.0208401	0.00467447	-4.45829	8.26514e-06	712018	712049	2544	24870	12262	3986
All_data_analysis_fig2	All_data_analysis_Fig2	DUP	L_a32pr	-0.0144246	0.00380338	-3.79258	0.000149127	712022	712053	3156	30843	14372	4905
All_data_analysis_fig2	All_data_analysis_Fig2	DUP	L_p24	-0.0277806	0.00430851	-6.44785	1.13649e-10	712006	712037	3048	28356	12818	4816
regional_specificity_threshold	Z0p2	DEL	L_V1	-0.0485684	0.00600802	-8.08393	6.29808e-16	711991	712022	1920	14879	9058	5998
regional_specificity_threshold	Z0p2	DEL	L_MST	-0.0436329	0.00689837	-6.32511	2.53469e-10	712002	712034	1608	13065	8731	4961
regional_specificity_threshold	Z0p2	DEL	L_V6	-0.0468175	0.00485794	-9.63731	5.61035e-22	711982	712014	2090	16334	8518	6493
regional_specificity_threshold	Z0p2	DEL	L_V2	-0.0588812	0.00564744	-10.4262	1.90516e-25	711965	711996	1919	15727	10008	5823
regional_specificity_threshold	Z0p2	DEL	L_V3	-0.0504653	0.00742561	-6.79612	1.07709e-11	711997	712028	1609	9703	6628	4956
regional_specificity_threshold	Z0p2	DEL	L_V4	-0.0590649	0.00583418	-10.1239	4.37162e-24	711968	711999	1995	14544	8630	6180
regional_specificity_threshold	Z0p2	DEL	L_V8	-0.0502256	0.00662731	-7.57858	3.50524e-14	711993	712024	1853	11195	7692	5897
regional_specificity_threshold	Z0p2	DEL	L_4	-0.0636537	0.00661028	-9.62949	6.05395e-22	711970	712001	1865	12442	7655	5818
regional_specificity_threshold	Z0p2	DEL	L_3b	-0.0708858	0.00595199	-11.9096	1.07583e-32	711938	711970	1868	12329	6619	5925
regional_specificity_threshold	Z0p2	DEL	L_FEF	-0.0207621	0.00832103	-2.49513	0.0125916	712013	712044	1494	8702	6179	4595
regional_specificity_threshold	Z0p2	DEL	L_PEF	-0.0658466	0.00567142	-11.6102	3.72174e-31	711946	711977	2318	12569	5945	7382
regional_specificity_threshold	Z0p2	DEL	L_55b	-0.0583569	0.00588272	-9.92005	3.43859e-23	711970	712002	1891	12847	7261	5840
regional_specificity_threshold	Z0p2	DEL	L_V3A	-0.0536583	0.0069583	-7.7114	1.24882e-14	711990	712022	1898	11823	8034	5961
regional_specificity_threshold	Z0p2	DEL	L_RSC	-0.0301118	0.00831984	-3.61928	0.000295477	712012	712043	1378	9697	7401	4223
regional_specificity_threshold	Z0p2	DEL	L_POS2	-0.0472153	0.00661792	-7.13445	9.74252e-13	711997	712028	1624	13627	9520	4937
regional_specificity_threshold	Z0p2	DEL	L_V7	-0.0387639	0.00560875	-6.91132	4.81271e-12	712003	712034	2359	16190	9446	7063
regional_specificity_threshold	Z0p2	DEL	L_IPS1	-0.0654642	0.00548489	-11.9354	7.89823e-33	711942	711973	2101	13889	7876	6578
regional_specificity_threshold	Z0p2	DEL	L_FFC	-0.0332157	0.00633616	-5.24225	1.58756e-07	712009	712041	1644	9638	5891	5282
regional_specificity_threshold	Z0p2	DEL	L_V3B	-0.0470371	0.00598014	-7.86555	3.68887e-15	711993	712025	2166	15745	10461	6441
regional_specificity_threshold	Z0p2	DEL	L_LO1	-0.0546602	0.0047681	-11.4637	2.041e-30	711958	711989	2177	14761	7700	6824
regional_specificity_threshold	Z0p2	DEL	L_LO2	-0.0512988	0.0047776	-10.7374	6.88545e-27	711969	712000	2365	18633	10092	7277
regional_specificity_threshold	Z0p2	DEL	L_PIT	-0.0628516	0.00568376	-11.0581	2.03255e-28	711955	711986	1885	14604	9027	5859
regional_specificity_threshold	Z0p2	DEL	L_MT	-0.0338639	0.00634097	-5.34049	9.27749e-08	712009	712040	1852	13846	9031	5753
regional_specificity_threshold	Z0p2	DEL	L_A1	-0.0510289	0.00577392	-8.83783	9.81899e-19	711984	712016	2234	15660	9936	6805
regional_specificity_threshold	Z0p2	DEL	L_PSL	-0.0286941	0.0087852	-3.26619	0.00109018	712012	712044	1339	7805	5531	4323
regional_specificity_threshold	Z0p2	DEL	L_SFL	-0.0502516	0.00910243	-5.52068	3.3802e-08	712003	712034	1462	7795	5435	4469
regional_specificity_threshold	Z0p2	DEL	L_PCV	-0.0803033	0.00861152	-9.32511	1.11704e-20	711965	711996	1258	7379	4864	4007
regional_specificity_threshold	Z0p2	DEL	L_STV	-0.0392969	0.0066978	-5.86713	4.4393e-09	712006	712037	1484	8182	5265	4782
regional_specificity_threshold	Z0p2	DEL	L_7Pm	-0.0784209	0.00746206	-10.5093	7.92417e-26	711952	711983	1588	10307	6258	5054
regional_specificity_threshold	Z0p2	DEL	L_7m	-0.0759013	0.00773614	-9.81127	1.01618e-22	711961	711993	1110	8502	5219	3511
regional_specificity_threshold	Z0p2	DEL	L_POS1	-0.0638982	0.00784808	-8.1419	3.90844e-16	711982	712014	1612	9658	6613	5247
regional_specificity_threshold	Z0p2	DEL	L_23d	-0.0645127	0.00527802	-12.2229	2.39712e-34	711939	711970	2288	15295	8496	7149
regional_specificity_threshold	Z0p2	DEL	L_v23ab	-0.0597075	0.0070863	-8.42576	3.60213e-17	711982	712014	1821	10580	6869	5541
regional_specificity_threshold	Z0p2	DEL	L_d23ab	-0.0429698	0.0065566	-6.55366	5.6247e-11	712002	712033	2035	13465	9139	6351
regional_specificity_threshold	Z0p2	DEL	L_31pv	-0.0368252	0.00701535	-5.24924	1.52851e-07	712008	712039	1621	9686	6343	5118
regional_specificity_threshold	Z0p2	DEL	L_5m	-0.0697434	0.00644361	-10.8237	2.69574e-27	711953	711984	1783	11795	6525	5371
regional_specificity_threshold	Z0p2	DEL	L_5mv	-0.0446384	0.00725049	-6.1566	7.4434e-10	712002	712034	1809	10581	7146	5508
regional_specificity_threshold	Z0p2	DEL	L_23c	-0.0476866	0.00824067	-5.78673	7.18515e-09	712003	712034	1575	9553	6708	4856
regional_specificity_threshold	Z0p2	DEL	L_5L	-0.0537087	0.00508608	-10.5599	4.62581e-26	711968	711999	2332	12511	6289	7261
regional_specificity_threshold	Z0p2	DEL	L_24dd	-0.047526	0.00649925	-7.31253	2.62914e-13	711996	712027	1940	11840	7632	6205
regional_specificity_threshold	Z0p2	DEL	L_24dv	-0.0389068	0.010036	-3.87673	0.000105895	712010	712041	1352	5479	3353	4326
regional_specificity_threshold	Z0p2	DEL	L_7AL	-0.0694226	0.00705853	-9.83528	8.00857e-23	711964	711996	1669	11343	7090	5437
regional_specificity_threshold	Z0p2	DEL	L_SCEF	-0.0789345	0.00886122	-8.90785	5.23559e-19	711969	712001	1440	8143	5017	4593
regional_specificity_threshold	Z0p2	DEL	L_6ma	-0.0379569	0.0064446	-5.88972	3.87335e-09	712006	712037	2200	12063	7434	6765
regional_specificity_threshold	Z0p2	DEL	L_7Am	-0.0513819	0.0073678	-6.97385	3.09125e-12	711996	712027	1589	11684	8851	4891
regional_specificity_threshold	Z0p2	DEL	L_7PL	-0.0556614	0.00670991	-8.29541	1.08722e-16	711985	712017	1828	12745	8025	5489
regional_specificity_threshold	Z0p2	DEL	L_7PC	-0.0512122	0.00637398	-8.03457	9.43005e-16	711990	712021	1835	11897	7610	5731
regional_specificity_threshold	Z0p2	DEL	L_LIPv	-0.0724702	0.00628281	-11.5347	8.97604e-31	711942	711973	1634	10335	5581	4980
regional_specificity_threshold	Z0p2	DEL	L_VIP	-0.0670531	0.00542749	-12.3543	4.72155e-35	711935	711966	2165	14742	8027	6861
regional_specificity_threshold	Z0p2	DEL	L_MIP	-0.0590273	0.00679241	-8.69018	3.63928e-18	711981	712012	1725	13242	8504	5375
regional_specificity_threshold	Z0p2	DEL	L_1	-0.0796874	0.00661216	-12.0516	1.94102e-33	711930	711962	1791	10391	5719	5836
regional_specificity_threshold	Z0p2	DEL	L_2	-0.0656966	0.00747903	-8.78411	1.58544e-18	711976	712008	1569	10190	6729	5213
regional_specificity_threshold	Z0p2	DEL	L_3a	-0.0535824	0.00642305	-8.34221	7.32676e-17	711986	712018	1947	12298	7963	5984
regional_specificity_threshold	Z0p2	DEL	L_6d	-0.0693072	0.00650923	-10.6475	1.81339e-26	711955	711987	1827	9841	5045	5659
regional_specificity_threshold	Z0p2	DEL	L_6mp	-0.052907	0.00734335	-7.20476	5.83046e-13	711994	712025	1685	10121	6604	5452
regional_specificity_threshold	Z0p2	DEL	L_6v	-0.0503887	0.00738229	-6.82562	8.77379e-12	711997	712028	1706	11607	8084	5328
regional_specificity_threshold	Z0p2	DEL	L_p24pr	-0.0454067	0.00656412	-6.9174	4.61055e-12	711999	712030	2010	12497	7994	6044
regional_specificity_threshold	Z0p2	DEL	L_33pr	-0.0445148	0.00742208	-5.99761	2.00505e-09	712003	712034	1926	11869	8394	5839
regional_specificity_threshold	Z0p2	DEL	L_a24pr	-0.0377453	0.00598113	-6.31073	2.78172e-10	712005	712036	2010	13274	8815	6417
regional_specificity_threshold	Z0p2	DEL	L_p32pr	-0.0404861	0.00570398	-7.09787	1.27015e-12	712001	712032	2329	13404	8308	7352
regional_specificity_threshold	Z0p2	DEL	L_a24	-0.0384753	0.0068537	-5.6138	1.98133e-08	712007	712038	1771	10411	6789	5678
regional_specificity_threshold	Z0p2	DEL	L_d32	-0.0255529	0.00604387	-4.2279	2.35963e-05	712013	712044	2207	13767	9218	6666
regional_specificity_threshold	Z0p2	DEL	L_8BM	-0.0448652	0.0065464	-6.85342	7.22653e-12	711999	712031	2054	12432	7812	6385
regional_specificity_threshold	Z0p2	DEL	L_p32	-0.0298515	0.00541688	-5.51083	3.57487e-08	712010	712042	2167	13151	7067	6868
regional_specificity_threshold	Z0p2	DEL	L_10r	-0.0438544	0.00650882	-6.73769	1.61256e-11	712000	712032	1855	13790	9535	5958
regional_specificity_threshold	Z0p2	DEL	L_47m	-0.0631303	0.0068273	-9.24675	2.33099e-20	711973	712005	2138	12245	7297	6557
regional_specificity_threshold	Z0p2	DEL	L_8Av	-0.0785713	0.00711267	-11.0467	2.3087e-28	711945	711976	1542	8911	4599	4845
regional_specificity_threshold	Z0p2	DEL	L_8Ad	-0.0459648	0.00566403	-8.11523	4.86982e-16	711993	712024	2099	11376	6456	6659
regional_specificity_threshold	Z0p2	DEL	L_9m	-0.0270922	0.00585607	-4.62636	3.72337e-06	712012	712043	1965	10369	5779	6121
regional_specificity_threshold	Z0p2	DEL	L_8BL	-0.0412576	0.0077897	-5.29643	1.18183e-07	712006	712038	1348	6870	3981	4363
regional_specificity_threshold	Z0p2	DEL	L_9p	-0.0300596	0.00565461	-5.31595	1.0619e-07	712011	712042	1866	10585	6479	5995
regional_specificity_threshold	Z0p2	DEL	L_10d	-0.0426049	0.00502925	-8.47142	2.4366e-17	711993	712025	2536	16051	8236	7626
regional_specificity_threshold	Z0p2	DEL	L_8C	-0.0509599	0.00692644	-7.35731	1.88212e-13	711994	712025	1825	12261	8397	5534
regional_specificity_threshold	Z0p2	DEL	L_44	-0.0485154	0.00591815	-8.19774	2.46053e-16	711990	712022	1791	10191	6254	5606
regional_specificity_threshold	Z0p2	DEL	L_45	-0.0334761	0.00707734	-4.73004	2.24596e-06	712010	712041	2054	12666	9040	6115
regional_specificity_threshold	Z0p2	DEL	L_47l	-0.03699	0.00641106	-5.76971	7.94973e-09	712007	712038	2106	11272	7095	6319
regional_specificity_threshold	Z0p2	DEL	L_a47r	-0.0249717	0.010072	-2.47932	0.0131638	712013	712044	1336	5441	3511	4092
regional_specificity_threshold	Z0p2	DEL	L_6r	-0.0486686	0.0054212	-8.97746	2.78875e-19	711985	712017	2133	14686	7793	6486
regional_specificity_threshold	Z0p2	DEL	L_IFJa	-0.0419149	0.00591319	-7.08837	1.36046e-12	712000	712031	2325	14168	9053	7301
regional_specificity_threshold	Z0p2	DEL	L_IFJp	-0.0431584	0.00692428	-6.2329	4.58568e-10	712003	712034	2121	13410	9311	6357
regional_specificity_threshold	Z0p2	DEL	L_IFSp	-0.0371675	0.00576854	-6.44313	1.17236e-10	712005	712036	1875	10186	5999	6040
regional_specificity_threshold	Z0p2	DEL	L_IFSa	-0.0546528	0.00477824	-11.4378	2.75109e-30	711958	711989	2415	14289	7328	7659
regional_specificity_threshold	Z0p2	DEL	L_p9.46v	-0.0528749	0.00481642	-10.9781	4.94338e-28	711965	711996	2436	13814	7037	7691
regional_specificity_threshold	Z0p2	DEL	L_46	-0.0455372	0.00532589	-8.55015	1.23587e-17	711990	712022	2220	13436	8089	7160
regional_specificity_threshold	Z0p2	DEL	L_a9.46v	-0.032404	0.00646466	-5.01248	5.37688e-07	712010	712041	1964	13539	9499	6122
regional_specificity_threshold	Z0p2	DEL	L_9.46d	-0.0290909	0.00570735	-5.0971	3.45137e-07	712011	712042	2026	10764	6538	6449
regional_specificity_threshold	Z0p2	DEL	L_9a	-0.0451478	0.00735234	-6.1406	8.23276e-10	712002	712034	1502	13069	9971	4711
regional_specificity_threshold	Z0p2	DEL	L_10v	-0.0523637	0.00551571	-9.49356	2.25076e-21	711979	712010	1944	13801	8163	6311
regional_specificity_threshold	Z0p2	DEL	L_a10p	-0.0534792	0.00532372	-10.0455	9.71723e-24	711973	712004	2452	15788	9208	7623
regional_specificity_threshold	Z0p2	DEL	L_10pp	-0.0363432	0.00609282	-5.96493	2.45062e-09	712007	712038	2034	12237	7767	6340
regional_specificity_threshold	Z0p2	DEL	L_11l	-0.0512676	0.00724147	-7.07972	1.44807e-12	711995	712027	1925	9631	5807	5861
regional_specificity_threshold	Z0p2	DEL	L_13l	-0.0364283	0.0078859	-4.61942	3.84992e-06	712009	712041	1450	8267	5274	4640
regional_specificity_threshold	Z0p2	DEL	L_OFC	-0.0289937	0.00637958	-4.54476	5.50229e-06	712012	712043	1742	9942	6351	5565
regional_specificity_threshold	Z0p2	DEL	L_47s	-0.0184169	0.00889616	-2.07021	0.0384337	712013	712044	1388	7103	5057	4300
regional_specificity_threshold	Z0p2	DEL	L_LIPd	-0.053743	0.00673357	-7.98136	1.45316e-15	711989	712020	1923	12339	8359	5878
regional_specificity_threshold	Z0p2	DEL	L_6a	-0.0779553	0.00800178	-9.74225	2.00882e-22	711961	711992	1487	7586	4126	4577
regional_specificity_threshold	Z0p2	DEL	L_i6.8	-0.0484789	0.00693988	-6.98554	2.84434e-12	711997	712028	1619	8957	5736	5330
regional_specificity_threshold	Z0p2	DEL	L_s6.8	-0.052041	0.00612456	-8.4971	1.9539e-17	711986	712018	1982	12499	7314	6084
regional_specificity_threshold	Z0p2	DEL	L_43	-0.0596755	0.00711771	-8.38409	5.13725e-17	711983	712014	1598	8505	4881	5185
regional_specificity_threshold	Z0p2	DEL	L_OP4	-0.0605549	0.00675352	-8.96641	3.08307e-19	711977	712009	1623	9211	5655	5137
regional_specificity_threshold	Z0p2	DEL	L_OP1	-0.080866	0.00785945	-10.289	7.98506e-25	711953	711985	1507	9509	5744	4868
regional_specificity_threshold	Z0p2	DEL	L_OP2.3	-0.0531741	0.00524901	-10.1303	4.09614e-24	711972	712004	2298	15823	8407	7336
regional_specificity_threshold	Z0p2	DEL	L_52	-0.0556655	0.00640392	-8.6924	3.56872e-18	711982	712014	1580	12471	6999	5085
regional_specificity_threshold	Z0p2	DEL	L_RI	-0.0581658	0.00624038	-9.32087	1.16255e-20	711976	712007	2041	13778	8698	6424
regional_specificity_threshold	Z0p2	DEL	L_PFcm	-0.0563865	0.00573626	-9.82984	8.45255e-23	711973	712004	2256	13268	7576	6983
regional_specificity_threshold	Z0p2	DEL	L_PoI2	-0.03947	0.00631249	-6.25268	4.04084e-10	712004	712036	1733	12322	7393	5209
regional_specificity_threshold	Z0p2	DEL	L_TA2	-0.0218175	0.00706372	-3.08867	0.00201075	712013	712044	1694	10181	6925	5145
regional_specificity_threshold	Z0p2	DEL	L_FOP4	-0.0332431	0.00574004	-5.79144	6.98659e-09	712008	712040	2105	13869	8001	6456
regional_specificity_threshold	Z0p2	DEL	L_MI	-0.0137805	0.00588904	-2.34003	0.0192829	712011	712042	2018	12344	6691	6091
regional_specificity_threshold	Z0p2	DEL	L_Pir	-0.0321098	0.00616683	-5.20686	1.9221e-07	712010	712041	1804	15386	10131	5342
regional_specificity_threshold	Z0p2	DEL	L_AVI	-0.0284395	0.00689219	-4.12634	3.68702e-05	712012	712043	1818	10940	7211	5849
regional_specificity_threshold	Z0p2	DEL	L_AAIC	-0.0171711	0.00723148	-2.37449	0.017574	712013	712044	1443	9215	5169	4512
regional_specificity_threshold	Z0p2	DEL	L_FOP1	-0.0374435	0.00537497	-6.96628	3.26208e-12	712003	712035	2167	13845	7429	6726
regional_specificity_threshold	Z0p2	DEL	L_FOP3	-0.0481139	0.00624169	-7.70848	1.2778e-14	711993	712025	1867	12918	7175	5695
regional_specificity_threshold	Z0p2	DEL	L_FOP2	-0.037197	0.00706943	-5.26168	1.42861e-07	712008	712039	1894	8713	4951	6154
regional_specificity_threshold	Z0p2	DEL	L_PFt	-0.05743	0.00649765	-8.83858	9.75305e-19	711980	712012	1981	13578	8658	6146
regional_specificity_threshold	Z0p2	DEL	L_AIP	-0.0415214	0.00599752	-6.9231	4.42904e-12	712001	712032	1872	8839	4891	6098
regional_specificity_threshold	Z0p2	DEL	L_EC	-0.0325713	0.00659111	-4.9417	7.7492e-07	712010	712041	2034	14292	10315	6044
regional_specificity_threshold	Z0p2	DEL	L_PreS	-0.018648	0.00699362	-2.66643	0.00766667	712013	712044	2007	12430	8879	5883
regional_specificity_threshold	Z0p2	DEL	L_H	-0.0387703	0.00614912	-6.30502	2.88626e-10	712005	712036	1960	15073	9456	5813
regional_specificity_threshold	Z0p2	DEL	L_ProS	-0.0637139	0.00692952	-9.19455	3.79228e-20	711974	712005	1717	11453	6682	5333
regional_specificity_threshold	Z0p2	DEL	L_PeEc	-0.0382578	0.00612535	-6.24582	4.22235e-10	712005	712036	1855	13340	8143	5763
regional_specificity_threshold	Z0p2	DEL	L_STGa	-0.0313529	0.00627419	-4.99713	5.82281e-07	712010	712042	1734	10453	5320	5497
regional_specificity_threshold	Z0p2	DEL	L_PBelt	-0.0397885	0.00767484	-5.18427	2.1702e-07	712007	712038	1662	8884	5541	5183
regional_specificity_threshold	Z0p2	DEL	L_A5	-0.0111512	0.0059922	-1.86096	0.0627512	712010	712041	1707	13442	8693	5228
regional_specificity_threshold	Z0p2	DEL	L_PHA1	-0.0244873	0.00746907	-3.2785	0.00104374	712013	712044	1702	9342	6434	4965
regional_specificity_threshold	Z0p2	DEL	L_PHA3	-0.0102909	0.00591326	-1.74031	0.0818063	712009	712040	1878	14122	9065	5831
regional_specificity_threshold	Z0p2	DEL	L_STSda	-0.0297846	0.00763279	-3.90219	9.53502e-05	712012	712043	1414	7736	5079	4541
regional_specificity_threshold	Z0p2	DEL	L_STSdp	-0.0255294	0.0071102	-3.59053	0.000330065	712013	712044	1645	8864	5763	5230
regional_specificity_threshold	Z0p2	DEL	L_STSvp	-0.0353089	0.00711118	-4.96526	6.86523e-07	712009	712040	1707	12605	9140	5528
regional_specificity_threshold	Z0p2	DEL	L_TGd	-0.0286423	0.00603817	-4.74355	2.10118e-06	712012	712043	1757	12252	7263	5619
regional_specificity_threshold	Z0p2	DEL	L_TE1a	-0.0337532	0.0080336	-4.20151	2.65232e-05	712011	712042	1237	6469	4360	3860
regional_specificity_threshold	Z0p2	DEL	L_TE1p	-0.0257042	0.00770437	-3.33632	0.000849078	712013	712044	1223	6821	4426	3820
regional_specificity_threshold	Z0p2	DEL	L_TE2a	-0.0201127	0.00679137	-2.96151	0.00306159	712013	712044	1546	11128	7002	4711
regional_specificity_threshold	Z0p2	DEL	L_TF	-0.0319927	0.00589602	-5.42615	5.7634e-08	712010	712041	1616	11858	6756	5193
regional_specificity_threshold	Z0p2	DEL	L_TE2p	-0.0168581	0.00770998	-2.18654	0.0287773	712013	712044	1216	7798	4509	3831
regional_specificity_threshold	Z0p2	DEL	L_PHT	-0.0154453	0.00827995	-1.86538	0.0621291	712012	712044	1425	9657	6932	4557
regional_specificity_threshold	Z0p2	DEL	L_PH	-0.0379064	0.00819205	-4.62722	3.70787e-06	712009	712040	1162	7880	4578	3828
regional_specificity_threshold	Z0p2	DEL	L_TPOJ1	-0.023959	0.00745899	-3.2121	0.00131785	712013	712044	1663	10312	7223	5191
regional_specificity_threshold	Z0p2	DEL	L_TPOJ2	-0.0668687	0.00750153	-8.91401	4.95295e-19	711975	712006	1356	9321	5898	4327
regional_specificity_threshold	Z0p2	DEL	L_TPOJ3	-0.0543182	0.00683406	-7.94816	1.90052e-15	711989	712020	1707	13373	9067	5434
regional_specificity_threshold	Z0p2	DEL	L_DVT	-0.0613916	0.00680538	-9.02105	1.87524e-19	711976	712008	1709	13567	9144	5493
regional_specificity_threshold	Z0p2	DEL	L_PGp	-0.058429	0.00609748	-9.58248	9.5538e-22	711973	712005	1762	13988	8736	5476
regional_specificity_threshold	Z0p2	DEL	L_IP2	-0.0535481	0.00592796	-9.03314	1.67916e-19	711981	712013	1844	11140	6005	5817
regional_specificity_threshold	Z0p2	DEL	L_IP1	-0.0541477	0.00542224	-9.98622	1.76855e-23	711973	712004	1955	14716	8790	6181
regional_specificity_threshold	Z0p2	DEL	L_IP0	-0.0508973	0.00478172	-10.6441	1.88035e-26	711970	712001	2280	18148	10722	7088
regional_specificity_threshold	Z0p2	DEL	L_PFop	-0.0739739	0.00836465	-8.84364	9.32172e-19	711972	712003	1231	9773	6785	3799
regional_specificity_threshold	Z0p2	DEL	L_PF	-0.058958	0.00799565	-7.37376	1.66369e-13	711990	712021	1505	8370	5301	4804
regional_specificity_threshold	Z0p2	DEL	L_PFm	-0.0629731	0.00878949	-7.16459	7.82254e-13	711990	712021	1086	5905	3680	3488
regional_specificity_threshold	Z0p2	DEL	L_PGi	-0.0419207	0.00674999	-6.21049	5.29012e-10	712003	712035	1924	13875	10215	6086
regional_specificity_threshold	Z0p2	DEL	L_PGs	-0.0561096	0.00726058	-7.72798	1.09657e-14	711989	712020	1593	12460	8457	4843
regional_specificity_threshold	Z0p2	DEL	L_V6A	-0.0293322	0.00670879	-4.3722	1.2305e-05	712012	712043	1990	11094	7348	6154
regional_specificity_threshold	Z0p2	DEL	L_VMV1	-0.0301346	0.00620602	-4.8557	1.2003e-06	712011	712042	1827	11648	7509	5707
regional_specificity_threshold	Z0p2	DEL	L_VMV3	-0.0708294	0.0088685	-7.98662	1.3925e-15	711981	712012	1293	8023	5290	3843
regional_specificity_threshold	Z0p2	DEL	L_PHA2	-0.0367435	0.0061566	-5.96815	2.40266e-09	712006	712038	1936	13317	8246	5971
regional_specificity_threshold	Z0p2	DEL	L_V4t	-0.0518637	0.00620119	-8.3635	6.11816e-17	711987	712019	2279	14689	9956	7134
regional_specificity_threshold	Z0p2	DEL	L_FST	-0.0262841	0.00934779	-2.8118	0.00492688	712013	712044	1178	7201	5345	3602
regional_specificity_threshold	Z0p2	DEL	L_V3CD	-0.0463264	0.0054806	-8.45281	2.85827e-17	711990	712022	1845	16148	9114	5689
regional_specificity_threshold	Z0p2	DEL	L_LO3	-0.045949	0.00602083	-7.63168	2.32507e-14	711995	712027	2178	15592	10269	6486
regional_specificity_threshold	Z0p2	DEL	L_VMV2	-0.0550594	0.00793252	-6.94098	3.90314e-12	711994	712026	1564	9062	6066	5113
regional_specificity_threshold	Z0p2	DEL	L_31pd	-0.0362242	0.00831127	-4.35845	1.31038e-05	712010	712041	1484	10019	7459	4537
regional_specificity_threshold	Z0p2	DEL	L_31a	-0.0331202	0.00806446	-4.10693	4.01071e-05	712011	712042	1254	6604	4125	4008
regional_specificity_threshold	Z0p2	DEL	L_VVC	-0.0292363	0.0070537	-4.14481	3.40197e-05	712012	712043	1761	9523	5985	5263
regional_specificity_threshold	Z0p2	DEL	L_25	-0.0133862	0.00748511	-1.78838	0.0737155	712012	712043	1580	9193	6052	4884
regional_specificity_threshold	Z0p2	DEL	L_s32	-0.0466861	0.00525763	-8.8797	6.74559e-19	711987	712019	2294	13342	7760	7360
regional_specificity_threshold	Z0p2	DEL	L_pOFC	-0.0268735	0.00579126	-4.64035	3.47995e-06	712012	712043	2114	11488	6906	6462
regional_specificity_threshold	Z0p2	DEL	L_PoI1	-0.0294336	0.00594443	-4.95146	7.37066e-07	712011	712042	1910	14998	9512	5659
regional_specificity_threshold	Z0p2	DEL	L_Ig	-0.0446111	0.00626568	-7.11992	1.0827e-12	711998	712030	1935	12177	6991	6087
regional_specificity_threshold	Z0p2	DEL	L_FOP5	-0.0403748	0.00552899	-7.30239	2.83517e-13	712000	712032	2098	13844	7750	6323
regional_specificity_threshold	Z0p2	DEL	L_p10p	-0.0284691	0.00596367	-4.77375	1.80929e-06	712012	712043	1946	13680	8660	5909
regional_specificity_threshold	Z0p2	DEL	L_p47r	-0.0423944	0.00562149	-7.54149	4.66136e-14	711998	712029	2004	11638	6987	6184
regional_specificity_threshold	Z0p2	DEL	L_TGv	-0.0261412	0.00581279	-4.49718	6.88918e-06	712012	712044	2000	11574	6009	6344
regional_specificity_threshold	Z0p2	DEL	L_MBelt	-0.0194564	0.00629151	-3.09248	0.0019851	712013	712044	1917	11769	6855	5835
regional_specificity_threshold	Z0p2	DEL	L_LBelt	-0.0506031	0.00637463	-7.9382	2.0595e-15	711991	712022	2152	12838	8300	6467
regional_specificity_threshold	Z0p2	DEL	L_A4	-0.0644997	0.00738155	-8.73796	2.38745e-18	711977	712009	1503	8801	4904	4658
regional_specificity_threshold	Z0p2	DEL	L_STSva	-0.0394048	0.00673129	-5.85398	4.80533e-09	712006	712037	1953	10605	6688	6165
regional_specificity_threshold	Z0p2	DEL	L_TE1m	-0.0414458	0.00666375	-6.21959	4.99202e-10	712003	712035	1452	9273	6113	4798
regional_specificity_threshold	Z0p2	DEL	L_PI	-0.0438807	0.00680433	-6.44895	1.12828e-10	712002	712033	1716	11530	7084	5344
regional_specificity_threshold	Z0p2	DEL	L_a32pr	-0.0407052	0.00651548	-6.24746	4.17823e-10	712004	712035	1912	11414	7587	5825
regional_specificity_threshold	Z0p2	DEL	L_p24	-0.0320312	0.00569816	-5.62131	1.89704e-08	712009	712041	2032	15090	9338	6378
regional_specificity_threshold	Z0p2	DUP	L_V1	-0.016911	0.00416408	-4.06117	4.88425e-05	712020	712052	3724	32066	14871	5998
regional_specificity_threshold	Z0p2	DUP	L_MST	-0.0191199	0.00468291	-4.08291	4.44894e-05	712019	712051	3097	27019	13188	4961
regional_specificity_threshold	Z0p2	DUP	L_V6	-0.0222766	0.00331053	-6.72902	1.71167e-11	712009	712040	4097	38193	16071	6493
regional_specificity_threshold	Z0p2	DUP	L_V2	-0.0207878	0.00355912	-5.8407	5.20442e-09	712014	712045	3629	32911	14036	5823
regional_specificity_threshold	Z0p2	DUP	L_V3	-0.0149571	0.00423252	-3.53385	0.000409622	712022	712053	3067	26505	12112	4956
regional_specificity_threshold	Z0p2	DUP	L_V4	-0.0123689	0.00382202	-3.23622	0.00121137	712023	712054	3880	35941	15544	6180
regional_specificity_threshold	Z0p2	DUP	L_V8	-0.0202187	0.00427429	-4.7303	2.24302e-06	712017	712049	3718	29997	14850	5897
regional_specificity_threshold	Z0p2	DUP	L_4	-0.012986	0.00371638	-3.49427	0.000475437	712022	712054	3705	35143	15899	5818
regional_specificity_threshold	Z0p2	DUP	L_3b	-0.0169374	0.00378845	-4.47081	7.79567e-06	712020	712051	3723	33281	14212	5925
regional_specificity_threshold	Z0p2	DUP	L_FEF	-0.0197854	0.00474278	-4.1717	3.02435e-05	712019	712050	2964	26498	12817	4595
regional_specificity_threshold	Z0p2	DUP	L_PEF	-0.0195726	0.0035415	-5.52663	3.26758e-08	712015	712047	4647	39955	16661	7382
regional_specificity_threshold	Z0p2	DUP	L_55b	-0.0259819	0.00406748	-6.3877	1.68682e-10	712007	712039	3666	34345	16421	5840
regional_specificity_threshold	Z0p2	DUP	L_V3A	-0.0225754	0.00395885	-5.70251	1.18181e-08	712013	712044	3708	32608	15144	5961
regional_specificity_threshold	Z0p2	DUP	L_RSC	-0.0187811	0.00555606	-3.38029	0.000724193	712021	712052	2635	23305	11813	4223
regional_specificity_threshold	Z0p2	DUP	L_POS2	-0.0314862	0.00452175	-6.96328	3.33235e-12	712000	712031	3076	27707	15038	4937
regional_specificity_threshold	Z0p2	DUP	L_V7	-0.0179123	0.00366199	-4.89141	1.00176e-06	712018	712050	4443	39317	17531	7063
regional_specificity_threshold	Z0p2	DUP	L_IPS1	-0.0211088	0.003308	-6.38114	1.76067e-10	712011	712043	4113	37519	16562	6578
regional_specificity_threshold	Z0p2	DUP	L_FFC	-0.0261306	0.00361784	-7.22272	5.10977e-13	712002	712034	3270	27329	11363	5282
regional_specificity_threshold	Z0p2	DUP	L_V3B	-0.0115204	0.00380649	-3.02653	0.00247404	712023	712054	4066	33864	15563	6441
regional_specificity_threshold	Z0p2	DUP	L_LO1	-0.022865	0.00317242	-7.20741	5.71798e-13	712006	712037	4255	41521	17206	6824
regional_specificity_threshold	Z0p2	DUP	L_LO2	-0.0227806	0.00319539	-7.1292	1.01213e-12	712006	712038	4517	41691	18138	7277
regional_specificity_threshold	Z0p2	DUP	L_PIT	-0.0167894	0.00395363	-4.24658	2.17133e-05	712020	712051	3646	33071	16253	5859
regional_specificity_threshold	Z0p2	DUP	L_MT	-0.0132104	0.003732	-3.53975	0.000400579	712022	712054	3604	33589	14527	5753
regional_specificity_threshold	Z0p2	DUP	L_A1	-0.0204561	0.0036195	-5.65164	1.59092e-08	712014	712046	4288	39321	17955	6805
regional_specificity_threshold	Z0p2	DUP	L_PSL	-0.0335131	0.00537932	-6.22999	4.67177e-10	712004	712035	2667	21433	10734	4323
regional_specificity_threshold	Z0p2	DUP	L_SFL	-0.0205278	0.00580417	-3.53674	0.000405172	712020	712051	2819	21854	12002	4469
regional_specificity_threshold	Z0p2	DUP	L_PCV	-0.0229078	0.00544719	-4.20544	2.60667e-05	712017	712049	2483	20762	11416	4007
regional_specificity_threshold	Z0p2	DUP	L_STV	-0.0308492	0.00423664	-7.28152	3.3101e-13	711998	712029	2969	25970	12404	4782
regional_specificity_threshold	Z0p2	DUP	L_7Pm	-0.0174835	0.0046372	-3.77027	0.000163108	712020	712052	3115	29059	13804	5054
regional_specificity_threshold	Z0p2	DUP	L_7m	-0.0231155	0.00430395	-5.37075	7.84772e-08	712014	712045	2215	23867	12140	3511
regional_specificity_threshold	Z0p2	DUP	L_POS1	-0.0219676	0.0046197	-4.7552	1.98359e-06	712016	712048	3211	28050	13784	5247
regional_specificity_threshold	Z0p2	DUP	L_23d	-0.0248528	0.00308108	-8.06628	7.27793e-16	711998	712030	4492	40393	17035	7149
regional_specificity_threshold	Z0p2	DUP	L_v23ab	-0.0297148	0.003913	-7.59386	3.11538e-14	711997	712028	3484	29969	14896	5541
regional_specificity_threshold	Z0p2	DUP	L_d23ab	-0.0175295	0.00369118	-4.74903	2.04502e-06	712019	712050	3984	36370	15619	6351
regional_specificity_threshold	Z0p2	DUP	L_31pv	-0.0233101	0.00382417	-6.09545	1.09285e-09	712011	712042	3196	28810	12420	5118
regional_specificity_threshold	Z0p2	DUP	L_5m	-0.0105536	0.00429167	-2.4591	0.0139294	712023	712054	3382	34247	16518	5371
regional_specificity_threshold	Z0p2	DUP	L_5mv	-0.0117589	0.00442125	-2.65963	0.00782318	712023	712054	3388	27670	13673	5508
regional_specificity_threshold	Z0p2	DUP	L_23c	-0.0266896	0.00464802	-5.74215	9.35856e-09	712010	712041	3064	28890	14003	4856
regional_specificity_threshold	Z0p2	DUP	L_5L	-0.0212871	0.0027659	-7.69627	1.40584e-14	712005	712036	4550	40604	16315	7261
regional_specificity_threshold	Z0p2	DUP	L_24dd	-0.026829	0.00365323	-7.34389	2.08077e-13	712001	712032	3886	35215	16542	6205
regional_specificity_threshold	Z0p2	DUP	L_24dv	-0.0283506	0.00523863	-5.41183	6.24402e-08	712011	712042	2713	23728	12365	4326
regional_specificity_threshold	Z0p2	DUP	L_7AL	-0.0203465	0.00410294	-4.95901	7.08975e-07	712017	712048	3445	31716	14763	5437
regional_specificity_threshold	Z0p2	DUP	L_SCEF	-0.0138867	0.00520657	-2.66714	0.00765035	712023	712054	2865	24480	12330	4593
regional_specificity_threshold	Z0p2	DUP	L_6ma	-0.0233405	0.00338208	-6.90123	5.16713e-12	712007	712038	4358	38635	15195	6765
regional_specificity_threshold	Z0p2	DUP	L_7Am	-0.00823905	0.00461096	-1.78684	0.0739648	712023	712054	3047	24613	13309	4891
regional_specificity_threshold	Z0p2	DUP	L_7PL	-0.0219701	0.00426177	-5.15515	2.53613e-07	712015	712046	3449	30442	14938	5489
regional_specificity_threshold	Z0p2	DUP	L_7PC	-0.0305963	0.00347289	-8.81003	1.25866e-18	711986	712017	3532	34223	15196	5731
regional_specificity_threshold	Z0p2	DUP	L_LIPv	-0.0215806	0.00414034	-5.21227	1.86686e-07	712015	712046	3107	26529	13123	4980
regional_specificity_threshold	Z0p2	DUP	L_VIP	-0.023773	0.00314765	-7.55261	4.27997e-14	712003	712034	4295	37809	15494	6861
regional_specificity_threshold	Z0p2	DUP	L_MIP	-0.018641	0.00418282	-4.45657	8.33179e-06	712019	712050	3413	32496	14490	5375
regional_specificity_threshold	Z0p2	DUP	L_1	-0.0271151	0.00390064	-6.95146	3.62364e-12	712003	712034	3645	29516	13544	5836
regional_specificity_threshold	Z0p2	DUP	L_2	-0.0209575	0.00433875	-4.83031	1.36396e-06	712017	712048	3283	28405	12739	5213
regional_specificity_threshold	Z0p2	DUP	L_3a	-0.0135098	0.00377831	-3.57562	0.000349462	712022	712054	3821	33553	14348	5984
regional_specificity_threshold	Z0p2	DUP	L_6d	-0.0150664	0.0038636	-3.89957	9.63878e-05	712021	712053	3612	32552	13780	5659
regional_specificity_threshold	Z0p2	DUP	L_6mp	-0.0198087	0.00375986	-5.26846	1.37682e-07	712016	712047	3489	30932	13972	5452
regional_specificity_threshold	Z0p2	DUP	L_6v	-0.0255117	0.00463128	-5.50856	3.62128e-08	712012	712043	3402	27917	13947	5328
regional_specificity_threshold	Z0p2	DUP	L_p24pr	-0.00985485	0.00402162	-2.45046	0.0142679	712023	712054	3871	34876	15447	6044
regional_specificity_threshold	Z0p2	DUP	L_33pr	-0.00591811	0.00370405	-1.59774	0.110102	712022	712053	3727	33338	14921	5839
regional_specificity_threshold	Z0p2	DUP	L_a24pr	-0.0193878	0.0033161	-5.84659	5.0236e-09	712015	712046	4038	39111	16031	6417
regional_specificity_threshold	Z0p2	DUP	L_p32pr	-0.022127	0.00272154	-8.1303	4.30096e-16	712001	712033	4614	42617	17642	7352
regional_specificity_threshold	Z0p2	DUP	L_a24	-0.0276847	0.0037173	-7.44753	9.53983e-14	711999	712031	3533	31233	13511	5678
regional_specificity_threshold	Z0p2	DUP	L_d32	-0.0188273	0.00353266	-5.32949	9.85697e-08	712017	712048	4223	36087	14897	6666
regional_specificity_threshold	Z0p2	DUP	L_8BM	-0.0305817	0.0037543	-8.14578	3.78499e-16	711992	712023	4018	35383	16856	6385
regional_specificity_threshold	Z0p2	DUP	L_p32	-0.0218143	0.00307307	-7.09853	1.2641e-12	712007	712039	4345	41433	16676	6868
regional_specificity_threshold	Z0p2	DUP	L_10r	-0.0266679	0.00377775	-7.0592	1.67877e-12	712003	712034	3736	33382	14592	5958
regional_specificity_threshold	Z0p2	DUP	L_47m	-0.0193807	0.00335633	-5.77436	7.73345e-09	712015	712046	4143	38712	16545	6557
regional_specificity_threshold	Z0p2	DUP	L_8Av	-0.00624136	0.00445049	-1.4024	0.160798	712022	712054	3063	29430	13733	4845
regional_specificity_threshold	Z0p2	DUP	L_8Ad	-0.0186527	0.00309292	-6.03079	1.63382e-09	712015	712046	4169	38520	15914	6659
regional_specificity_threshold	Z0p2	DUP	L_9m	-0.0267774	0.00295181	-9.07151	1.1817e-19	711988	712020	3867	33838	15504	6121
regional_specificity_threshold	Z0p2	DUP	L_8BL	-0.0125537	0.00346056	-3.62766	0.000286058	712023	712054	2774	26213	10381	4363
regional_specificity_threshold	Z0p2	DUP	L_9p	-0.02123	0.00274403	-7.73681	1.02311e-14	712005	712036	3774	35633	14562	5995
regional_specificity_threshold	Z0p2	DUP	L_10d	-0.0189126	0.00257254	-7.35172	1.96254e-13	712010	712041	4820	43416	18007	7626
regional_specificity_threshold	Z0p2	DUP	L_8C	-0.0156134	0.00426923	-3.6572	0.000255039	712021	712053	3523	33293	16295	5534
regional_specificity_threshold	Z0p2	DUP	L_44	-0.0290667	0.00307231	-9.46085	3.07892e-21	711982	712013	3483	31269	13822	5606
regional_specificity_threshold	Z0p2	DUP	L_45	-0.0209085	0.00370774	-5.63914	1.71083e-08	712014	712045	3958	36676	17197	6115
regional_specificity_threshold	Z0p2	DUP	L_47l	-0.025819	0.00371136	-6.95675	3.49044e-12	712004	712036	4013	35775	15829	6319
regional_specificity_threshold	Z0p2	DUP	L_a47r	-0.0217193	0.00481055	-4.51493	6.33662e-06	712017	712048	2580	24708	12944	4092
regional_specificity_threshold	Z0p2	DUP	L_6r	-0.0218551	0.0031446	-6.95003	3.66067e-12	712008	712039	4162	40691	17586	6486
regional_specificity_threshold	Z0p2	DUP	L_IFJa	-0.0181417	0.00292297	-6.20659	5.42279e-10	712015	712046	4597	42980	17262	7301
regional_specificity_threshold	Z0p2	DUP	L_IFJp	-0.0235043	0.00368434	-6.37952	1.77941e-10	712009	712040	4128	36409	17646	6357
regional_specificity_threshold	Z0p2	DUP	L_IFSp	-0.028821	0.00351347	-8.20299	2.35535e-16	711993	712024	3794	31758	12939	6040
regional_specificity_threshold	Z0p2	DUP	L_IFSa	-0.0261306	0.0025243	-10.3516	4.16101e-25	711978	712009	4789	43430	17655	7659
regional_specificity_threshold	Z0p2	DUP	L_p9.46v	-0.0226978	0.00217977	-10.4129	2.18965e-25	711984	712015	4839	44875	18292	7691
regional_specificity_threshold	Z0p2	DUP	L_46	-0.0248284	0.00262187	-9.46976	2.82738e-21	711988	712019	4515	40272	17561	7160
regional_specificity_threshold	Z0p2	DUP	L_a9.46v	-0.0239899	0.00337785	-7.10212	1.23169e-12	712005	712036	3819	35814	16221	6122
regional_specificity_threshold	Z0p2	DUP	L_9.46d	-0.0277692	0.00318266	-8.72515	2.67354e-18	711990	712021	4078	35491	14130	6449
regional_specificity_threshold	Z0p2	DUP	L_9a	-0.0224598	0.00443064	-5.0692	3.99758e-07	712015	712046	2905	27422	14031	4711
regional_specificity_threshold	Z0p2	DUP	L_10v	-0.0244117	0.00308235	-7.91982	2.38794e-15	712000	712031	3943	36934	15735	6311
regional_specificity_threshold	Z0p2	DUP	L_a10p	-0.0207696	0.00276692	-7.50641	6.0963e-14	712007	712038	4781	42978	17752	7623
regional_specificity_threshold	Z0p2	DUP	L_10pp	-0.0235872	0.00315469	-7.47686	7.63564e-14	712003	712035	4011	35721	16185	6340
regional_specificity_threshold	Z0p2	DUP	L_11l	-0.0190862	0.00336793	-5.66705	1.45427e-08	712015	712047	3772	34770	14924	5861
regional_specificity_threshold	Z0p2	DUP	L_13l	-0.0333681	0.00434594	-7.67798	1.62177e-14	711993	712025	2865	23795	12236	4640
regional_specificity_threshold	Z0p2	DUP	L_OFC	-0.0246682	0.00327884	-7.52346	5.35186e-14	712002	712033	3450	31697	14014	5565
regional_specificity_threshold	Z0p2	DUP	L_47s	-0.0230321	0.00526237	-4.37675	1.20508e-05	712017	712048	2723	21514	12422	4300
regional_specificity_threshold	Z0p2	DUP	L_LIPd	-0.0224674	0.00364883	-6.15741	7.40502e-10	712011	712042	3667	31187	14469	5878
regional_specificity_threshold	Z0p2	DUP	L_6a	-0.0183776	0.00438779	-4.18836	2.81066e-05	712019	712051	2886	25486	12703	4577
regional_specificity_threshold	Z0p2	DUP	L_i6.8	-0.0117079	0.00341837	-3.425	0.000614888	712023	712054	3387	30945	12874	5330
regional_specificity_threshold	Z0p2	DUP	L_s6.8	-0.0287621	0.0033002	-8.71527	2.91738e-18	711989	712020	3849	33158	14912	6084
regional_specificity_threshold	Z0p2	DUP	L_43	-0.0285048	0.00355759	-8.01238	1.12974e-15	711995	712026	3244	30735	15299	5185
regional_specificity_threshold	Z0p2	DUP	L_OP4	-0.0232376	0.0040658	-5.71538	1.09577e-08	712012	712044	3170	27236	12764	5137
regional_specificity_threshold	Z0p2	DUP	L_OP1	-0.0219728	0.00471236	-4.6628	3.12087e-06	712017	712048	3027	27535	13277	4868
regional_specificity_threshold	Z0p2	DUP	L_OP2.3	-0.0251436	0.00319206	-7.87693	3.36803e-15	711999	712031	4533	41605	17758	7336
regional_specificity_threshold	Z0p2	DUP	L_52	-0.0173868	0.00397839	-4.37031	1.24118e-05	712020	712051	3209	31585	13465	5085
regional_specificity_threshold	Z0p2	DUP	L_RI	-0.0229826	0.00386487	-5.94653	2.74243e-09	712011	712043	3980	37135	16834	6424
regional_specificity_threshold	Z0p2	DUP	L_PFcm	-0.0250933	0.00313927	-7.99338	1.31829e-15	711998	712030	4320	38336	15273	6983
regional_specificity_threshold	Z0p2	DUP	L_PoI2	-0.0209168	0.003415	-6.12497	9.08336e-10	712012	712044	3288	32400	16373	5209
regional_specificity_threshold	Z0p2	DUP	L_TA2	-0.025226	0.00389266	-6.48042	9.16328e-11	712007	712039	3208	27894	12574	5145
regional_specificity_threshold	Z0p2	DUP	L_FOP4	-0.0286417	0.00358432	-7.99083	1.34578e-15	711995	712026	4093	37093	17303	6456
regional_specificity_threshold	Z0p2	DUP	L_MI	-0.0263557	0.00392882	-6.7083	1.97309e-11	712005	712037	3879	31952	15310	6091
regional_specificity_threshold	Z0p2	DUP	L_Pir	-0.00581252	0.00389183	-1.49352	0.135303	712022	712053	3422	30689	15510	5342
regional_specificity_threshold	Z0p2	DUP	L_AVI	-0.0282034	0.00405229	-6.95986	3.4141e-12	712002	712034	3681	32855	14994	5849
regional_specificity_threshold	Z0p2	DUP	L_AAIC	-0.0242996	0.00448368	-5.41957	5.9795e-08	712013	712044	2871	25486	13425	4512
regional_specificity_threshold	Z0p2	DUP	L_FOP1	-0.0258882	0.00303575	-8.52779	1.49954e-17	711994	712025	4212	37692	16342	6726
regional_specificity_threshold	Z0p2	DUP	L_FOP3	-0.0228492	0.00365654	-6.24886	4.14094e-10	712010	712042	3564	33021	15297	5695
regional_specificity_threshold	Z0p2	DUP	L_FOP2	-0.0204749	0.00391411	-5.23106	1.68674e-07	712016	712047	3862	31547	14010	6154
regional_specificity_threshold	Z0p2	DUP	L_PFt	-0.0276331	0.00412024	-6.70668	1.99505e-11	712004	712036	3854	35057	16217	6146
regional_specificity_threshold	Z0p2	DUP	L_AIP	-0.0250293	0.00323014	-7.74868	9.31897e-15	712000	712032	3817	31585	12051	6098
regional_specificity_threshold	Z0p2	DUP	L_EC	-0.0100932	0.00357885	-2.82022	0.00479937	712023	712054	3878	33422	15241	6044
regional_specificity_threshold	Z0p2	DUP	L_PreS	-0.010753	0.00370932	-2.89892	0.00374483	712023	712054	3741	32802	14554	5883
regional_specificity_threshold	Z0p2	DUP	L_H	-0.012751	0.00427458	-2.98298	0.00285481	712023	712054	3691	32008	14985	5813
regional_specificity_threshold	Z0p2	DUP	L_ProS	-0.0253499	0.00447788	-5.66113	1.50534e-08	712011	712042	3267	30645	13636	5333
regional_specificity_threshold	Z0p2	DUP	L_PeEc	-0.0194236	0.00386501	-5.02549	5.02476e-07	712017	712048	3634	34267	15584	5763
regional_specificity_threshold	Z0p2	DUP	L_STGa	-0.0330715	0.00364288	-9.07841	1.10916e-19	711981	712012	3426	30273	13762	5497
regional_specificity_threshold	Z0p2	DUP	L_PBelt	-0.0157546	0.00406224	-3.8783	0.000105216	712021	712052	3246	30837	14046	5183
regional_specificity_threshold	Z0p2	DUP	L_A5	-0.0242915	0.00369148	-6.58044	4.69961e-11	712007	712039	3330	31029	12977	5228
regional_specificity_threshold	Z0p2	DUP	L_PHA1	-0.010687	0.00378645	-2.82245	0.00476623	712023	712054	3134	26047	12458	4965
regional_specificity_threshold	Z0p2	DUP	L_PHA3	-0.0266999	0.00398025	-6.7081	1.97573e-11	712005	712036	3644	32362	13916	5831
regional_specificity_threshold	Z0p2	DUP	L_STSda	-0.0276442	0.00427581	-6.46525	1.01309e-10	712006	712037	2884	28203	13494	4541
regional_specificity_threshold	Z0p2	DUP	L_STSdp	-0.0405253	0.00430676	-9.4097	5.01441e-21	711971	712003	3230	27906	14285	5230
regional_specificity_threshold	Z0p2	DUP	L_STSvp	-0.03199	0.00424097	-7.54309	4.60467e-14	711995	712027	3483	31851	15799	5528
regional_specificity_threshold	Z0p2	DUP	L_TGd	-0.0255953	0.00381103	-6.71611	1.87025e-11	712006	712037	3531	32672	14680	5619
regional_specificity_threshold	Z0p2	DUP	L_TE1a	-0.0251663	0.00496286	-5.07094	3.96131e-07	712014	712045	2441	22224	10709	3860
regional_specificity_threshold	Z0p2	DUP	L_TE1p	-0.0456503	0.00489838	-9.31946	1.17805e-20	711969	712000	2370	20401	9843	3820
regional_specificity_threshold	Z0p2	DUP	L_TE2a	-0.0213458	0.00387401	-5.51001	3.59147e-08	712014	712046	2998	28909	13028	4711
regional_specificity_threshold	Z0p2	DUP	L_TF	-0.0251036	0.00354934	-7.07277	1.52255e-12	712004	712036	3224	31236	13279	5193
regional_specificity_threshold	Z0p2	DUP	L_TE2p	-0.0297471	0.00469343	-6.33804	2.3309e-10	712005	712036	2414	22085	12000	3831
regional_specificity_threshold	Z0p2	DUP	L_PHT	-0.0258165	0.00488284	-5.28719	1.24313e-07	712012	712044	2841	27135	13884	4557
regional_specificity_threshold	Z0p2	DUP	L_PH	-0.0218413	0.00527743	-4.13863	3.49501e-05	712018	712049	2365	23449	11784	3828
regional_specificity_threshold	Z0p2	DUP	L_TPOJ1	-0.0304506	0.00417203	-7.29873	2.91318e-13	711998	712030	3237	28558	12663	5191
regional_specificity_threshold	Z0p2	DUP	L_TPOJ2	-0.0250231	0.00497909	-5.02563	5.02123e-07	712014	712045	2716	23560	11859	4327
regional_specificity_threshold	Z0p2	DUP	L_TPOJ3	-0.022003	0.00399499	-5.50764	3.64014e-08	712014	712045	3355	32929	15078	5434
regional_specificity_threshold	Z0p2	DUP	L_DVT	-0.0148617	0.00394963	-3.76282	0.000168044	712022	712053	3413	31246	13775	5493
regional_specificity_threshold	Z0p2	DUP	L_PGp	-0.0185252	0.00356465	-5.19692	2.02773e-07	712017	712049	3436	32954	13702	5476
regional_specificity_threshold	Z0p2	DUP	L_IP2	-0.0241792	0.00306292	-7.89414	2.93448e-15	712000	712032	3677	33540	14367	5817
regional_specificity_threshold	Z0p2	DUP	L_IP1	-0.0173805	0.00342669	-5.07209	3.93739e-07	712018	712050	3871	35381	15799	6181
regional_specificity_threshold	Z0p2	DUP	L_IP0	-0.0196578	0.00298635	-6.58254	4.63352e-11	712012	712043	4398	38637	15851	7088
regional_specificity_threshold	Z0p2	DUP	L_PFop	-0.0079301	0.00491276	-1.61418	0.106489	712023	712054	2407	23778	11797	3799
regional_specificity_threshold	Z0p2	DUP	L_PF	-0.0383585	0.00461346	-8.31448	9.25975e-17	711984	712016	2937	24896	12098	4804
regional_specificity_threshold	Z0p2	DUP	L_PFm	-0.0328763	0.00519652	-6.3266	2.51034e-10	712003	712035	2147	21604	11414	3488
regional_specificity_threshold	Z0p2	DUP	L_PGi	-0.0200275	0.0040679	-4.92331	8.51461e-07	712017	712048	3836	33856	15479	6086
regional_specificity_threshold	Z0p2	DUP	L_PGs	-0.0286471	0.00480823	-5.95792	2.55802e-09	712008	712039	3023	26947	13877	4843
regional_specificity_threshold	Z0p2	DUP	L_V6A	-0.0259319	0.00404577	-6.40964	1.46115e-10	712007	712038	3836	31214	14341	6154
regional_specificity_threshold	Z0p2	DUP	L_VMV1	-0.0200055	0.00328741	-6.08548	1.16309e-09	712013	712045	3548	30967	11911	5707
regional_specificity_threshold	Z0p2	DUP	L_VMV3	-0.0102784	0.00526255	-1.95312	0.0508068	712023	712054	2391	21295	11134	3843
regional_specificity_threshold	Z0p2	DUP	L_PHA2	-0.0237141	0.00379186	-6.25396	4.00803e-10	712010	712041	3754	34889	15841	5971
regional_specificity_threshold	Z0p2	DUP	L_V4t	-0.0166382	0.00372263	-4.46949	7.84412e-06	712020	712051	4540	40255	17936	7134
regional_specificity_threshold	Z0p2	DUP	L_FST	-0.0290427	0.00520576	-5.57895	2.42211e-08	712009	712041	2218	18299	9845	3602
regional_specificity_threshold	Z0p2	DUP	L_V3CD	-0.0104161	0.00411919	-2.52868	0.0114497	712023	712054	3538	33792	14761	5689
regional_specificity_threshold	Z0p2	DUP	L_LO3	-0.0108997	0.00362986	-3.00279	0.00267546	712023	712054	4098	36015	15625	6486
regional_specificity_threshold	Z0p2	DUP	L_VMV2	-0.0142613	0.00406122	-3.51157	0.000445551	712022	712053	3170	29406	12968	5113
regional_specificity_threshold	Z0p2	DUP	L_31pd	-0.0206789	0.00467992	-4.41865	9.93604e-06	712018	712049	2858	26372	13301	4537
regional_specificity_threshold	Z0p2	DUP	L_31a	-0.0325657	0.0049362	-6.59732	4.19447e-11	712002	712033	2493	21201	9861	4008
regional_specificity_threshold	Z0p2	DUP	L_VVC	-0.0167051	0.0036257	-4.6074	4.07923e-06	712020	712051	3331	28044	11856	5263
regional_specificity_threshold	Z0p2	DUP	L_25	-0.0246531	0.00483469	-5.09921	3.41314e-07	712014	712045	3075	25593	12652	4884
regional_specificity_threshold	Z0p2	DUP	L_s32	-0.028154	0.00294046	-9.5747	1.03002e-21	711982	712013	4616	40599	17303	7360
regional_specificity_threshold	Z0p2	DUP	L_pOFC	-0.0164249	0.00332142	-4.94513	7.61389e-07	712019	712051	4112	34987	14399	6462
regional_specificity_threshold	Z0p2	DUP	L_PoI1	-0.0138462	0.00400185	-3.45995	0.000540353	712022	712054	3586	33115	15850	5659
regional_specificity_threshold	Z0p2	DUP	L_Ig	-0.0254939	0.00339187	-7.51617	5.65838e-14	712001	712032	3789	35399	15108	6087
regional_specificity_threshold	Z0p2	DUP	L_FOP5	-0.0136145	0.00364447	-3.73567	0.000187256	712022	712053	4049	35171	15302	6323
regional_specificity_threshold	Z0p2	DUP	L_p10p	-0.0186076	0.00306424	-6.0725	1.26109e-09	712015	712046	3721	35404	15463	5909
regional_specificity_threshold	Z0p2	DUP	L_p47r	-0.0217783	0.00338832	-6.42746	1.29975e-10	712010	712042	3947	36386	14955	6184
regional_specificity_threshold	Z0p2	DUP	L_TGv	-0.0245853	0.0034294	-7.16896	7.57708e-13	712004	712035	3965	36784	15683	6344
regional_specificity_threshold	Z0p2	DUP	L_MBelt	-0.0222551	0.00400372	-5.55861	2.72199e-08	712013	712045	3633	32357	14278	5835
regional_specificity_threshold	Z0p2	DUP	L_LBelt	-0.00487343	0.00379827	-1.28307	0.19947	712021	712053	4081	34274	16120	6467
regional_specificity_threshold	Z0p2	DUP	L_A4	-0.0272185	0.00447471	-6.08273	1.18317e-09	712008	712039	2893	27788	13726	4658
regional_specificity_threshold	Z0p2	DUP	L_STSva	-0.0206958	0.00339721	-6.09201	1.11658e-09	712013	712044	3871	32714	13904	6165
regional_specificity_threshold	Z0p2	DUP	L_TE1m	-0.0343392	0.00418436	-8.20656	2.2864e-16	711988	712019	2964	29098	14475	4798
regional_specificity_threshold	Z0p2	DUP	L_PI	-0.0136908	0.00376317	-3.63812	0.000274691	712022	712054	3403	34617	15391	5344
regional_specificity_threshold	Z0p2	DUP	L_a32pr	-0.0133858	0.00332929	-4.02061	5.80629e-05	712022	712053	3735	35815	15994	5825
regional_specificity_threshold	Z0p2	DUP	L_p24	-0.0233961	0.00350786	-6.66962	2.56981e-11	712008	712039	4030	37451	15807	6378
regional_specificity_threshold	Z0p5	DEL	L_V1	-0.0685114	0.00756967	-9.05077	1.42911e-19	711972	712004	1511	11056	7461	4771
regional_specificity_threshold	Z0p5	DEL	L_MST	-0.0109506	0.0108849	-1.00603	0.3144	712012	712043	869	6279	5142	2726
regional_specificity_threshold	Z0p5	DEL	L_V6	-0.0468692	0.00604926	-7.74792	9.37454e-15	711994	712025	1630	13414	7741	5098
regional_specificity_threshold	Z0p5	DEL	L_V2	-0.0708117	0.00682987	-10.3679	3.50886e-25	711958	711989	1461	11676	7494	4471
regional_specificity_threshold	Z0p5	DEL	L_V3	-0.0358423	0.0093117	-3.84916	0.00011855	712011	712042	1111	6903	5077	3524
regional_specificity_threshold	Z0p5	DEL	L_V4	-0.0467753	0.00887418	-5.27094	1.35834e-07	712005	712036	1370	9842	7612	4253
regional_specificity_threshold	Z0p5	DEL	L_V8	-0.0359553	0.0080871	-4.446	8.75195e-06	712010	712041	1462	8358	5891	4661
regional_specificity_threshold	Z0p5	DEL	L_4	-0.0927889	0.00880392	-10.5395	5.75016e-26	711945	711976	1216	7289	4060	3796
regional_specificity_threshold	Z0p5	DEL	L_3b	-0.0825329	0.00835527	-9.87795	5.23758e-23	711957	711989	1221	8861	5709	3956
regional_specificity_threshold	Z0p5	DEL	L_FEF	-0.00768252	0.0103926	-0.739231	0.459768	712011	712043	994	6301	4811	3077
regional_specificity_threshold	Z0p5	DEL	L_PEF	-0.0725183	0.00612762	-11.8347	2.63413e-32	711938	711969	2026	10937	5175	6484
regional_specificity_threshold	Z0p5	DEL	L_55b	-0.0664172	0.00793988	-8.36501	6.04024e-17	711980	712011	1472	7820	4832	4537
regional_specificity_threshold	Z0p5	DEL	L_V3A	-0.0692815	0.00907172	-7.63709	2.22948e-14	711984	712016	1359	8252	5911	4378
regional_specificity_threshold	Z0p5	DEL	L_RSC	-0.0108999	0.0129656	-0.84068	0.400528	712012	712044	898	3882	2630	2739
regional_specificity_threshold	Z0p5	DEL	L_POS2	-0.060285	0.00842909	-7.15201	8.57396e-13	711991	712022	1055	10297	7680	3174
regional_specificity_threshold	Z0p5	DEL	L_V7	-0.0284598	0.00646633	-4.40123	1.07684e-05	712012	712043	1993	13716	8954	5969
regional_specificity_threshold	Z0p5	DEL	L_IPS1	-0.0738574	0.00612411	-12.0601	1.75169e-33	711934	711965	1710	12011	6984	5406
regional_specificity_threshold	Z0p5	DEL	L_FFC	-0.0326765	0.00797214	-4.09883	4.15363e-05	712011	712042	1211	7720	5306	3953
regional_specificity_threshold	Z0p5	DEL	L_V3B	-0.0545546	0.00678702	-8.03808	9.16386e-16	711988	712019	1937	12151	7488	5742
regional_specificity_threshold	Z0p5	DEL	L_LO1	-0.0570032	0.00495498	-11.5042	1.27793e-30	711955	711986	1921	12258	5930	6039
regional_specificity_threshold	Z0p5	DEL	L_LO2	-0.0511507	0.00553749	-9.23717	2.5493e-20	711981	712013	1897	16054	9304	5825
regional_specificity_threshold	Z0p5	DEL	L_PIT	-0.0563826	0.00666681	-8.45721	2.75257e-17	711984	712015	1596	12575	8750	4996
regional_specificity_threshold	Z0p5	DEL	L_MT	-0.0356778	0.00666824	-5.35041	8.78314e-08	712008	712040	1684	13211	8839	5198
regional_specificity_threshold	Z0p5	DEL	L_A1	-0.0648477	0.00704886	-9.19975	3.61339e-20	711973	712004	1690	11722	7486	5125
regional_specificity_threshold	Z0p5	DEL	L_PSL	-0.0228402	0.0125878	-1.81447	0.0696061	712013	712044	707	4770	3898	2230
regional_specificity_threshold	Z0p5	DEL	L_SFL	-0.0727324	0.0118195	-6.15358	7.58641e-10	711994	712025	873	5548	4435	2694
regional_specificity_threshold	Z0p5	DEL	L_PCV	-0.10124	0.0126162	-8.02458	1.02298e-15	711972	712004	697	4970	3913	2231
regional_specificity_threshold	Z0p5	DEL	L_STV	-0.0789767	0.0111178	-7.10363	1.21833e-12	711986	712017	709	4202	3015	2323
regional_specificity_threshold	Z0p5	DEL	L_7Pm	-0.0836107	0.0100248	-8.3404	7.43952e-17	711974	712005	1059	7379	5518	3375
regional_specificity_threshold	Z0p5	DEL	L_7m	-0.119548	0.0132024	-9.05501	1.37473e-19	711957	711988	678	4240	3015	2067
regional_specificity_threshold	Z0p5	DEL	L_POS1	-0.0801581	0.0120981	-6.62569	3.46305e-11	711989	712020	833	6091	5056	2677
regional_specificity_threshold	Z0p5	DEL	L_23d	-0.0649849	0.00589473	-11.0242	2.96246e-28	711954	711985	1813	13052	7526	5693
regional_specificity_threshold	Z0p5	DEL	L_v23ab	-0.0674924	0.00876264	-7.70229	1.34124e-14	711984	712016	1378	8228	5878	4163
regional_specificity_threshold	Z0p5	DEL	L_d23ab	-0.0267215	0.00874225	-3.05659	0.00223894	712013	712044	1435	7986	5504	4570
regional_specificity_threshold	Z0p5	DEL	L_31pv	-0.0433805	0.00978644	-4.43272	9.30917e-06	712008	712039	1023	6642	4868	3275
regional_specificity_threshold	Z0p5	DEL	L_5m	-0.106696	0.00960085	-11.1132	1.09831e-28	711932	711963	1165	6502	3624	3496
regional_specificity_threshold	Z0p5	DEL	L_5mv	-0.0432272	0.00887457	-4.87091	1.1115e-06	712007	712038	1377	9015	6676	4157
regional_specificity_threshold	Z0p5	DEL	L_23c	-0.0323771	0.0129541	-2.49936	0.0124423	712012	712044	882	3930	2781	2643
regional_specificity_threshold	Z0p5	DEL	L_5L	-0.0734323	0.00744839	-9.85882	6.33707e-23	711962	711993	1573	8660	4862	4896
regional_specificity_threshold	Z0p5	DEL	L_24dd	-0.0390549	0.00898388	-4.34722	1.37929e-05	712009	712040	1229	7502	5320	3833
regional_specificity_threshold	Z0p5	DEL	L_24dv	-0.0508327	0.014407	-3.52832	0.00041828	712009	712040	798	3256	2339	2618
regional_specificity_threshold	Z0p5	DEL	L_7AL	-0.0776681	0.00897356	-8.65521	4.94736e-18	711972	712004	877	7808	5231	2869
regional_specificity_threshold	Z0p5	DEL	L_SCEF	-0.0879812	0.0128138	-6.86612	6.61215e-12	711986	712017	932	4866	3825	3002
regional_specificity_threshold	Z0p5	DEL	L_6ma	-0.0517693	0.00877532	-5.89943	3.65217e-09	712001	712032	1539	8687	5896	4607
regional_specificity_threshold	Z0p5	DEL	L_7Am	-0.0808785	0.00968056	-8.35473	6.59008e-17	711974	712006	982	6247	4601	2979
regional_specificity_threshold	Z0p5	DEL	L_7PL	-0.0542337	0.00818522	-6.6258	3.46044e-11	711996	712028	1364	10073	7113	4053
regional_specificity_threshold	Z0p5	DEL	L_7PC	-0.0725666	0.0100083	-7.25063	4.16001e-13	711986	712018	1118	5150	2870	3639
regional_specificity_threshold	Z0p5	DEL	L_LIPv	-0.0849904	0.0077588	-10.9541	6.44374e-28	711943	711974	1142	8097	4679	3453
regional_specificity_threshold	Z0p5	DEL	L_VIP	-0.0836921	0.00795871	-10.5158	7.39527e-26	711949	711981	1513	8569	4811	4700
regional_specificity_threshold	Z0p5	DEL	L_MIP	-0.0579665	0.00759886	-7.62831	2.3865e-14	711989	712020	1380	11731	8048	4280
regional_specificity_threshold	Z0p5	DEL	L_1	-0.0998918	0.0094031	-10.6233	2.35196e-26	711941	711973	1217	6319	3853	3968
regional_specificity_threshold	Z0p5	DEL	L_2	-0.0810321	0.0101637	-7.97272	1.55848e-15	711978	712009	892	6728	5073	3025
regional_specificity_threshold	Z0p5	DEL	L_3a	-0.0671081	0.00816829	-8.21569	2.11908e-16	711981	712012	1550	8569	5626	4748
regional_specificity_threshold	Z0p5	DEL	L_6d	-0.0956714	0.00885714	-10.8016	3.42753e-27	711940	711972	1205	7241	4160	3804
regional_specificity_threshold	Z0p5	DEL	L_6mp	-0.0447784	0.00990566	-4.52049	6.17244e-06	712007	712039	1162	5223	3229	3823
regional_specificity_threshold	Z0p5	DEL	L_6v	-0.0726303	0.0108339	-6.70399	2.03216e-11	711990	712022	1168	7024	5324	3644
regional_specificity_threshold	Z0p5	DEL	L_p24pr	-0.0460237	0.00729776	-6.30655	2.8578e-10	712001	712033	1685	11324	7603	5057
regional_specificity_threshold	Z0p5	DEL	L_33pr	-0.048771	0.00812428	-6.00312	1.93824e-09	712001	712033	1666	9561	6693	5049
regional_specificity_threshold	Z0p5	DEL	L_a24pr	-0.0235135	0.00716154	-3.2833	0.00102614	712013	712044	1699	8863	5598	5464
regional_specificity_threshold	Z0p5	DEL	L_p32pr	-0.0429281	0.00696391	-6.16436	7.08711e-10	712003	712034	1835	10708	7086	5763
regional_specificity_threshold	Z0p5	DEL	L_a24	-0.0278926	0.00835027	-3.34033	0.000836917	712012	712044	1349	8040	5769	4370
regional_specificity_threshold	Z0p5	DEL	L_d32	-0.0241115	0.0081913	-2.94355	0.00324498	712013	712044	1540	9057	6697	4671
regional_specificity_threshold	Z0p5	DEL	L_8BM	-0.0294949	0.00854366	-3.45225	0.000556015	712012	712043	1339	8530	5927	4187
regional_specificity_threshold	Z0p5	DEL	L_p32	-0.0267741	0.00603151	-4.43904	9.03989e-06	712012	712044	1847	11695	6539	5901
regional_specificity_threshold	Z0p5	DEL	L_10r	-0.0359658	0.00907301	-3.96404	7.37107e-05	712010	712042	1190	7901	5542	3786
regional_specificity_threshold	Z0p5	DEL	L_47m	-0.0714231	0.00821025	-8.69925	3.35984e-18	711974	712006	1700	9969	6421	5198
regional_specificity_threshold	Z0p5	DEL	L_8Av	-0.0940125	0.0103562	-9.07792	1.11414e-19	711963	711994	1057	6165	3880	3350
regional_specificity_threshold	Z0p5	DEL	L_8Ad	-0.0565505	0.00763396	-7.40775	1.28849e-13	711991	712022	1420	8060	4920	4485
regional_specificity_threshold	Z0p5	DEL	L_9m	-0.0289476	0.00724719	-3.99431	6.48996e-05	712012	712043	1271	6290	3391	3925
regional_specificity_threshold	Z0p5	DEL	L_8BL	-0.0476192	0.0119322	-3.99083	6.58608e-05	712008	712040	683	4030	2727	2179
regional_specificity_threshold	Z0p5	DEL	L_9p	-0.0398444	0.00752828	-5.29263	1.20671e-07	712007	712038	1375	6960	4173	4395
regional_specificity_threshold	Z0p5	DEL	L_10d	-0.0449825	0.00623197	-7.21802	5.28938e-13	711998	712029	1963	12431	7379	5878
regional_specificity_threshold	Z0p5	DEL	L_8C	-0.0341892	0.010575	-3.233	0.00122511	712012	712043	1262	5292	3743	3847
regional_specificity_threshold	Z0p5	DEL	L_44	-0.0633924	0.00844903	-7.50293	6.26055e-14	711987	712019	1191	6790	4362	3752
regional_specificity_threshold	Z0p5	DEL	L_45	-0.0421181	0.00895786	-4.7018	2.58007e-06	712008	712039	1380	10113	8064	4120
regional_specificity_threshold	Z0p5	DEL	L_47l	-0.036965	0.00796406	-4.64148	3.46089e-06	712009	712040	1575	9383	6408	4744
regional_specificity_threshold	Z0p5	DEL	L_a47r	-0.0266128	0.0157709	-1.68747	0.0915147	712013	712044	550	2558	2006	1606
regional_specificity_threshold	Z0p5	DEL	L_6r	-0.050459	0.00684984	-7.36644	1.75759e-13	711994	712025	1524	10801	5908	4608
regional_specificity_threshold	Z0p5	DEL	L_IFJa	-0.0459273	0.00707282	-6.4935	8.40186e-11	712000	712032	1913	11318	7473	5984
regional_specificity_threshold	Z0p5	DEL	L_IFJp	-0.0413693	0.00816155	-5.06881	4.00584e-07	712007	712038	1680	11114	8185	5065
regional_specificity_threshold	Z0p5	DEL	L_IFSp	-0.0470631	0.00963131	-4.88647	1.0272e-06	712006	712037	1216	6442	4270	3920
regional_specificity_threshold	Z0p5	DEL	L_IFSa	-0.0484098	0.00613555	-7.89005	3.03234e-15	711992	712024	1901	8674	4478	6066
regional_specificity_threshold	Z0p5	DEL	L_p9.46v	-0.055559	0.00519325	-10.6983	1.05013e-26	711965	711996	2229	12969	6809	7065
regional_specificity_threshold	Z0p5	DEL	L_46	-0.0458878	0.0062899	-7.29548	2.9845e-13	711997	712028	1581	10210	6295	5044
regional_specificity_threshold	Z0p5	DEL	L_a9.46v	-0.0400488	0.00909017	-4.40573	1.05471e-05	712009	712040	1283	6208	3817	4007
regional_specificity_threshold	Z0p5	DEL	L_9.46d	-0.0283667	0.0067705	-4.18975	2.79349e-05	712012	712043	1366	7197	4538	4315
regional_specificity_threshold	Z0p5	DEL	L_9a	-0.0668316	0.0120907	-5.52753	3.25082e-08	711999	712030	794	6230	5353	2460
regional_specificity_threshold	Z0p5	DEL	L_10v	-0.0438459	0.00691974	-6.33635	2.35651e-10	712002	712033	1383	9457	6435	4521
regional_specificity_threshold	Z0p5	DEL	L_a10p	-0.0564104	0.00626828	-8.99933	2.28578e-19	711980	712011	1886	13621	8555	5923
regional_specificity_threshold	Z0p5	DEL	L_10pp	-0.0366616	0.00770058	-4.76089	1.9285e-06	712009	712040	1276	9544	6805	3946
regional_specificity_threshold	Z0p5	DEL	L_11l	-0.0743897	0.0126757	-5.86867	4.39846e-09	711995	712027	941	4823	3687	2813
regional_specificity_threshold	Z0p5	DEL	L_13l	-0.0335784	0.0121254	-2.76927	0.00561856	712012	712043	926	4086	2891	2996
regional_specificity_threshold	Z0p5	DEL	L_OFC	-0.0269374	0.00829993	-3.2455	0.00117261	712013	712044	1100	6616	4322	3485
regional_specificity_threshold	Z0p5	DEL	L_47s	-0.0174005	0.0110724	-1.57151	0.116064	712013	712044	993	5432	4251	3056
regional_specificity_threshold	Z0p5	DEL	L_LIPd	-0.0780503	0.00887096	-8.7984	1.39605e-18	711971	712002	1470	8358	5810	4486
regional_specificity_threshold	Z0p5	DEL	L_6a	-0.0912935	0.0105798	-8.62904	6.2211e-18	711968	712000	834	5106	2975	2593
regional_specificity_threshold	Z0p5	DEL	L_i6.8	-0.0433921	0.0101416	-4.27862	1.88122e-05	712008	712040	984	5010	3354	3228
regional_specificity_threshold	Z0p5	DEL	L_s6.8	-0.0509803	0.0090598	-5.62709	1.83463e-08	712002	712033	1318	8008	5583	4020
regional_specificity_threshold	Z0p5	DEL	L_43	-0.0572695	0.00887615	-6.45206	1.10533e-10	711996	712028	1058	6227	3983	3394
regional_specificity_threshold	Z0p5	DEL	L_OP4	-0.0549639	0.0103202	-5.32584	1.00571e-07	712002	712034	846	5088	3588	2663
regional_specificity_threshold	Z0p5	DEL	L_OP1	-0.125777	0.0180109	-6.98341	2.88793e-12	711979	712011	507	2959	2579	1609
regional_specificity_threshold	Z0p5	DEL	L_OP2.3	-0.0538788	0.00653111	-8.24956	1.59709e-16	711987	712018	1761	11462	6503	5635
regional_specificity_threshold	Z0p5	DEL	L_52	-0.0556544	0.00678461	-8.20304	2.35452e-16	711986	712017	1358	11512	6649	4344
regional_specificity_threshold	Z0p5	DEL	L_RI	-0.0634599	0.00687749	-9.22718	2.79841e-20	711973	712005	1709	12498	8135	5293
regional_specificity_threshold	Z0p5	DEL	L_PFcm	-0.062144	0.00656011	-9.47301	2.74063e-21	711972	712003	1880	11023	6435	5852
regional_specificity_threshold	Z0p5	DEL	L_PoI2	-0.0218183	0.0075552	-2.88785	0.00387915	712013	712044	1264	8396	4748	3816
regional_specificity_threshold	Z0p5	DEL	L_TA2	-0.0131183	0.0097235	-1.34914	0.177294	712012	712044	1004	7419	5816	3117
regional_specificity_threshold	Z0p5	DEL	L_FOP4	-0.0337809	0.00689862	-4.89676	9.74884e-07	712010	712041	1625	11893	7364	4887
regional_specificity_threshold	Z0p5	DEL	L_MI	-0.0122252	0.00740166	-1.65168	0.0986016	712011	712043	1355	9046	5065	4159
regional_specificity_threshold	Z0p5	DEL	L_Pir	-0.0389713	0.00659609	-5.90823	3.46226e-09	712006	712037	1594	13751	8961	4712
regional_specificity_threshold	Z0p5	DEL	L_AVI	-0.0265139	0.0102484	-2.58711	0.0096789	712013	712044	1218	6272	4399	3830
regional_specificity_threshold	Z0p5	DEL	L_AAIC	-0.0120961	0.00992861	-1.21831	0.223108	712012	712043	779	5520	3355	2375
regional_specificity_threshold	Z0p5	DEL	L_FOP1	-0.0315534	0.00733087	-4.30418	1.67667e-05	712011	712042	1528	8592	5357	4643
regional_specificity_threshold	Z0p5	DEL	L_FOP3	-0.0497695	0.00682308	-7.29428	3.01116e-13	711995	712026	1532	11772	6817	4644
regional_specificity_threshold	Z0p5	DEL	L_FOP2	-0.0388188	0.00825822	-4.70063	2.59488e-06	712008	712040	1519	7168	4365	4960
regional_specificity_threshold	Z0p5	DEL	L_PFt	-0.07111	0.00847846	-8.38714	5.00583e-17	711977	712009	1622	7928	5014	5126
regional_specificity_threshold	Z0p5	DEL	L_AIP	-0.0526354	0.00832533	-6.32233	2.58071e-10	711998	712030	1315	6323	3937	4289
regional_specificity_threshold	Z0p5	DEL	L_EC	-0.0368368	0.00751103	-4.90436	9.37885e-07	712009	712040	1729	12042	8964	5102
regional_specificity_threshold	Z0p5	DEL	L_PreS	-0.011707	0.00750381	-1.56014	0.118728	712011	712043	1736	11447	8563	5007
regional_specificity_threshold	Z0p5	DEL	L_H	-0.0390453	0.00648452	-6.02131	1.73239e-09	712005	712037	1723	14052	9044	5127
regional_specificity_threshold	Z0p5	DEL	L_ProS	-0.0457237	0.00937249	-4.8785	1.06957e-06	712006	712038	1064	7755	5629	3321
regional_specificity_threshold	Z0p5	DEL	L_PeEc	-0.0438218	0.00721273	-6.07561	1.23686e-09	712003	712034	1403	10581	6544	4427
regional_specificity_threshold	Z0p5	DEL	L_STGa	-0.0300274	0.0074858	-4.01126	6.04138e-05	712012	712043	1274	8483	4729	4043
regional_specificity_threshold	Z0p5	DEL	L_PBelt	-0.0655857	0.0118034	-5.5565	2.75514e-08	711999	712030	1066	4298	2747	3318
regional_specificity_threshold	Z0p5	DEL	L_A5	0.00193639	0.0108209	0.17895	0.857977	712008	712040	903	7032	5932	2869
regional_specificity_threshold	Z0p5	DEL	L_PHA1	-0.0143775	0.00856518	-1.6786	0.0932306	712012	712044	1376	7154	4892	4006
regional_specificity_threshold	Z0p5	DEL	L_PHA3	-0.011201	0.00763016	-1.46799	0.142109	712011	712042	1277	8910	5347	3993
regional_specificity_threshold	Z0p5	DEL	L_STSda	-0.0254403	0.0119845	-2.12278	0.0337735	712013	712044	753	4969	3820	2485
regional_specificity_threshold	Z0p5	DEL	L_STSdp	-0.0325639	0.0123079	-2.64576	0.00815123	712012	712044	940	3917	2633	3082
regional_specificity_threshold	Z0p5	DEL	L_STSvp	-0.0122956	0.00849979	-1.44658	0.148016	712012	712043	1138	9345	7392	3717
regional_specificity_threshold	Z0p5	DEL	L_TGd	-0.027257	0.00748285	-3.6426	0.000269947	712012	712044	1177	7980	4656	3845
regional_specificity_threshold	Z0p5	DEL	L_TE1a	-0.0439786	0.0136188	-3.22927	0.00124123	712010	712042	660	3838	3049	2155
regional_specificity_threshold	Z0p5	DEL	L_TE1p	-0.042628	0.0186755	-2.28256	0.0224572	712012	712043	474	1898	1385	1537
regional_specificity_threshold	Z0p5	DEL	L_TE2a	-0.00191357	0.011956	-0.16005	0.872841	712010	712042	805	5066	3926	2523
regional_specificity_threshold	Z0p5	DEL	L_TF	-0.0265847	0.00799747	-3.32414	0.00088704	712013	712044	1033	6909	3757	3350
regional_specificity_threshold	Z0p5	DEL	L_TE2p	-0.00939351	0.00987982	-0.950778	0.341718	712011	712043	570	5328	3240	1748
regional_specificity_threshold	Z0p5	DEL	L_PHT	0.0147457	0.0114968	1.28259	0.199637	712003	712034	716	6014	5140	2273
regional_specificity_threshold	Z0p5	DEL	L_PH	-0.0412401	0.0162923	-2.53126	0.0113659	712012	712043	463	3196	2818	1557
regional_specificity_threshold	Z0p5	DEL	L_TPOJ1	-0.0276585	0.0112795	-2.4521	0.0142033	712013	712044	798	5748	4558	2523
regional_specificity_threshold	Z0p5	DEL	L_TPOJ2	-0.0243778	0.0109714	-2.22194	0.0262884	712013	712044	694	3744	2601	2209
regional_specificity_threshold	Z0p5	DEL	L_TPOJ3	-0.0253246	0.0085339	-2.96753	0.00300233	712013	712044	1195	9530	7492	3816
regional_specificity_threshold	Z0p5	DEL	L_DVT	-0.0726346	0.00787102	-9.2281	2.77464e-20	711969	712000	1296	10407	6978	4197
regional_specificity_threshold	Z0p5	DEL	L_PGp	-0.0674433	0.00775019	-8.70214	3.27537e-18	711976	712008	1058	8414	5073	3256
regional_specificity_threshold	Z0p5	DEL	L_IP2	-0.0671305	0.0100582	-6.67422	2.49057e-11	711992	712023	1135	5524	3359	3668
regional_specificity_threshold	Z0p5	DEL	L_IP1	-0.0731244	0.00665596	-10.9863	4.51228e-28	711949	711980	1470	9493	4944	4646
regional_specificity_threshold	Z0p5	DEL	L_IP0	-0.0637471	0.00646816	-9.85552	6.5486e-23	711967	711999	1809	12591	7794	5697
regional_specificity_threshold	Z0p5	DEL	L_PFop	-0.0775122	0.00973416	-7.9629	1.68731e-15	711979	712010	839	8072	6058	2681
regional_specificity_threshold	Z0p5	DEL	L_PF	-0.0930115	0.0117241	-7.93338	2.14107e-15	711975	712006	724	4985	3738	2381
regional_specificity_threshold	Z0p5	DEL	L_PFm	-0.0399937	0.0114255	-3.50038	0.000464672	712010	712042	600	2990	1837	1860
regional_specificity_threshold	Z0p5	DEL	L_PGi	-0.0459687	0.00814258	-5.64547	1.64907e-08	712004	712035	1454	10914	8519	4579
regional_specificity_threshold	Z0p5	DEL	L_PGs	-0.0599093	0.00980978	-6.10709	1.01605e-09	711997	712029	863	7286	5412	2622
regional_specificity_threshold	Z0p5	DEL	L_V6A	-0.0265688	0.00715661	-3.71248	0.000205282	712012	712044	1763	10363	7098	5380
regional_specificity_threshold	Z0p5	DEL	L_VMV1	-0.0280626	0.00676433	-4.14861	3.34603e-05	712012	712043	1463	10051	6711	4571
regional_specificity_threshold	Z0p5	DEL	L_VMV3	-0.0687938	0.0123691	-5.56174	2.67369e-08	711998	712030	918	4914	3720	2779
regional_specificity_threshold	Z0p5	DEL	L_PHA2	-0.0412735	0.00726967	-5.6775	1.36826e-08	712005	712037	1542	10980	7087	4736
regional_specificity_threshold	Z0p5	DEL	L_V4t	-0.050363	0.00681305	-7.39215	1.44909e-13	711994	712025	2004	13486	9600	6264
regional_specificity_threshold	Z0p5	DEL	L_FST	-0.0291147	0.0123331	-2.3607	0.0182411	712013	712044	742	5101	4120	2238
regional_specificity_threshold	Z0p5	DEL	L_V3CD	-0.0514354	0.0101574	-5.06383	4.11206e-07	712004	712035	1004	7685	6370	3188
regional_specificity_threshold	Z0p5	DEL	L_LO3	-0.0355756	0.00745752	-4.77043	1.83933e-06	712009	712041	1733	11823	8757	5147
regional_specificity_threshold	Z0p5	DEL	L_VMV2	-0.0647923	0.0100923	-6.41999	1.36518e-10	711994	712026	1050	7337	5486	3410
regional_specificity_threshold	Z0p5	DEL	L_31pd	-0.0744474	0.0126207	-5.89885	3.66495e-09	711995	712027	966	4561	3303	2882
regional_specificity_threshold	Z0p5	DEL	L_31a	-0.0269153	0.0111654	-2.4106	0.015927	712013	712044	801	4849	3505	2527
regional_specificity_threshold	Z0p5	DEL	L_VVC	-0.0286463	0.0078891	-3.63112	0.000282244	712012	712044	1416	7760	4962	4232
regional_specificity_threshold	Z0p5	DEL	L_25	-0.0119871	0.00901079	-1.3303	0.18342	712012	712043	1204	7356	5349	3760
regional_specificity_threshold	Z0p5	DEL	L_s32	-0.0391888	0.00651876	-6.0117	1.83835e-09	712005	712037	1867	9655	5562	6061
regional_specificity_threshold	Z0p5	DEL	L_pOFC	-0.030416	0.00725875	-4.19025	2.7874e-05	712011	712043	1687	9696	6257	5171
regional_specificity_threshold	Z0p5	DEL	L_PoI1	-0.0227321	0.0067264	-3.37954	0.000726188	712013	712044	1547	10669	6311	4560
regional_specificity_threshold	Z0p5	DEL	L_Ig	-0.0327289	0.00781709	-4.18684	2.82954e-05	712011	712042	1269	8212	4928	4075
regional_specificity_threshold	Z0p5	DEL	L_FOP5	-0.0531111	0.00718856	-7.38828	1.49184e-13	711993	712024	1649	9332	5708	4984
regional_specificity_threshold	Z0p5	DEL	L_p10p	-0.046468	0.00848154	-5.47873	4.28793e-08	712004	712035	1432	8585	6200	4318
regional_specificity_threshold	Z0p5	DEL	L_p47r	-0.0457469	0.00746488	-6.12829	8.8958e-10	712002	712033	1309	8422	5986	4004
regional_specificity_threshold	Z0p5	DEL	L_TGv	-0.0222703	0.00727829	-3.05983	0.00221487	712013	712044	1322	8931	5019	4275
regional_specificity_threshold	Z0p5	DEL	L_MBelt	-0.0199283	0.00814085	-2.44794	0.0143682	712013	712044	1106	8148	5087	3300
regional_specificity_threshold	Z0p5	DEL	L_LBelt	-0.0527016	0.00678588	-7.76636	8.1066e-15	711991	712022	1873	11688	7871	5582
regional_specificity_threshold	Z0p5	DEL	L_A4	-0.0241095	0.0142025	-1.69755	0.0895937	712013	712044	811	3452	2408	2511
regional_specificity_threshold	Z0p5	DEL	L_STSva	-0.0473968	0.00843017	-5.62228	1.88646e-08	712003	712035	1435	8971	6242	4464
regional_specificity_threshold	Z0p5	DEL	L_TE1m	-0.0204046	0.00987278	-2.06675	0.0387588	712013	712044	786	5515	4055	2596
regional_specificity_threshold	Z0p5	DEL	L_PI	-0.0210179	0.00771847	-2.72307	0.00646833	712013	712044	1284	8550	5169	3986
regional_specificity_threshold	Z0p5	DEL	L_a32pr	-0.026945	0.00736846	-3.6568	0.000255434	712012	712044	1621	9455	6362	4905
regional_specificity_threshold	Z0p5	DEL	L_p24	-0.0279286	0.00712504	-3.91978	8.86519e-05	712012	712044	1529	11157	7830	4816
regional_specificity_threshold	Z0p5	DUP	L_V1	-0.0225689	0.00473595	-4.76545	1.88536e-06	712016	712047	2945	25972	13503	4771
regional_specificity_threshold	Z0p5	DUP	L_MST	-0.0181789	0.007323	-2.48244	0.0130491	712022	712053	1691	13730	8329	2726
regional_specificity_threshold	Z0p5	DUP	L_V6	-0.0227464	0.00411954	-5.5216	3.36254e-08	712013	712045	3213	30043	14880	5098
regional_specificity_threshold	Z0p5	DUP	L_V2	-0.0169967	0.00449451	-3.78166	0.000155824	712021	712052	2765	25682	12664	4471
regional_specificity_threshold	Z0p5	DUP	L_V3	-0.0176906	0.00527207	-3.35554	0.000792223	712021	712052	2156	17073	9020	3524
regional_specificity_threshold	Z0p5	DUP	L_V4	-0.00851352	0.00536944	-1.58555	0.112842	712023	712054	2675	24545	12653	4253
regional_specificity_threshold	Z0p5	DUP	L_V8	-0.0201287	0.00521576	-3.85921	0.000113782	712019	712051	2929	22127	11444	4661
regional_specificity_threshold	Z0p5	DUP	L_4	-0.00567594	0.00473297	-1.19923	0.230438	712022	712054	2397	24541	12212	3796
regional_specificity_threshold	Z0p5	DUP	L_3b	-0.0129345	0.00520728	-2.48393	0.0129949	712023	712054	2505	21641	11597	3956
regional_specificity_threshold	Z0p5	DUP	L_FEF	-0.00908135	0.00653227	-1.39023	0.164461	712023	712054	1978	17119	9976	3077
regional_specificity_threshold	Z0p5	DUP	L_PEF	-0.0210027	0.00383184	-5.48111	4.23063e-08	712015	712046	4099	35773	15645	6484
regional_specificity_threshold	Z0p5	DUP	L_55b	-0.0386545	0.00483028	-8.00254	1.22375e-15	711987	712018	2849	25631	13904	4537
regional_specificity_threshold	Z0p5	DUP	L_V3A	-0.0227779	0.00520365	-4.3773	1.20205e-05	712017	712048	2718	23961	12841	4378
regional_specificity_threshold	Z0p5	DUP	L_RSC	-0.00928911	0.00689765	-1.34671	0.178076	712023	712054	1723	15240	8441	2739
regional_specificity_threshold	Z0p5	DUP	L_POS2	-0.0306739	0.00624683	-4.91032	9.09839e-07	712012	712043	1975	17509	10792	3174
regional_specificity_threshold	Z0p5	DUP	L_V7	-0.026743	0.0042894	-6.23467	4.53426e-10	712007	712039	3754	31329	16540	5969
regional_specificity_threshold	Z0p5	DUP	L_IPS1	-0.0234363	0.00369905	-6.33576	2.36558e-10	712009	712041	3368	30781	14525	5406
regional_specificity_threshold	Z0p5	DUP	L_FFC	-0.0297673	0.00456878	-6.51538	7.26368e-11	712004	712035	2439	20252	9241	3953
regional_specificity_threshold	Z0p5	DUP	L_V3B	-0.00979165	0.003961	-2.47202	0.013436	712023	712054	3628	30917	14771	5742
regional_specificity_threshold	Z0p5	DUP	L_LO1	-0.023503	0.0033304	-7.0571	1.70433e-12	712006	712037	3752	35262	15252	6039
regional_specificity_threshold	Z0p5	DUP	L_LO2	-0.0195529	0.0038535	-5.07406	3.89682e-07	712017	712048	3599	34482	16835	5825
regional_specificity_threshold	Z0p5	DUP	L_PIT	-0.0172065	0.00452083	-3.80606	0.000141233	712021	712052	3100	26938	14938	4996
regional_specificity_threshold	Z0p5	DUP	L_MT	-0.011406	0.00397548	-2.86908	0.00411706	712023	712054	3252	31173	13912	5198
regional_specificity_threshold	Z0p5	DUP	L_A1	-0.015146	0.00482627	-3.13825	0.00169981	712022	712053	3264	30645	16185	5125
regional_specificity_threshold	Z0p5	DUP	L_PSL	-0.0350015	0.00859375	-4.07291	4.64442e-05	712015	712046	1385	9885	6478	2230
regional_specificity_threshold	Z0p5	DUP	L_SFL	-0.0139793	0.00780419	-1.79126	0.0732524	712023	712054	1696	12444	8893	2694
regional_specificity_threshold	Z0p5	DUP	L_PCV	-0.00959222	0.00833637	-1.15065	0.249879	712023	712054	1393	12126	8181	2231
regional_specificity_threshold	Z0p5	DUP	L_STV	-0.0511015	0.00704171	-7.25697	3.96971e-13	711989	712020	1400	13474	8724	2323
regional_specificity_threshold	Z0p5	DUP	L_7Pm	-0.012751	0.0060336	-2.11332	0.0345741	712023	712054	2093	19370	11432	3375
regional_specificity_threshold	Z0p5	DUP	L_7m	-0.0229451	0.00691547	-3.31793	0.000906983	712020	712051	1310	15187	9538	2067
regional_specificity_threshold	Z0p5	DUP	L_POS1	-0.0252826	0.00683621	-3.69834	0.000217062	712018	712049	1611	14470	9588	2677
regional_specificity_threshold	Z0p5	DUP	L_23d	-0.0236281	0.00358655	-6.58799	4.4666e-11	712008	712039	3544	33391	14717	5693
regional_specificity_threshold	Z0p5	DUP	L_v23ab	-0.0310273	0.00473463	-6.55327	5.63965e-11	712003	712034	2634	23491	12949	4163
regional_specificity_threshold	Z0p5	DUP	L_d23ab	-0.020691	0.00517552	-3.99786	6.39351e-05	712019	712050	2862	24332	12291	4570
regional_specificity_threshold	Z0p5	DUP	L_31pv	-0.0205157	0.00559325	-3.66793	0.000244571	712020	712051	2001	18948	9392	3275
regional_specificity_threshold	Z0p5	DUP	L_5m	-0.0177432	0.00587536	-3.01993	0.00252856	712021	712053	2226	22305	12881	3496
regional_specificity_threshold	Z0p5	DUP	L_5mv	-0.0116694	0.00563857	-2.06957	0.0384939	712023	712054	2583	21801	12370	4157
regional_specificity_threshold	Z0p5	DUP	L_23c	-0.0384268	0.00675438	-5.68918	1.27791e-08	712005	712037	1663	15549	9446	2643
regional_specificity_threshold	Z0p5	DUP	L_5L	-0.0197237	0.0040813	-4.83271	1.34764e-06	712017	712049	3097	27221	12848	4896
regional_specificity_threshold	Z0p5	DUP	L_24dd	-0.0294056	0.00499596	-5.88588	3.96425e-09	712008	712039	2392	23960	13618	3833
regional_specificity_threshold	Z0p5	DUP	L_24dv	-0.0303773	0.00723787	-4.197	2.70564e-05	712015	712047	1644	13871	9246	2618
regional_specificity_threshold	Z0p5	DUP	L_7AL	-0.0172657	0.00593989	-2.90673	0.00365254	712022	712053	1813	18530	10011	2869
regional_specificity_threshold	Z0p5	DUP	L_SCEF	-0.00465175	0.00702456	-0.662213	0.507836	712022	712054	1893	15105	9526	3002
regional_specificity_threshold	Z0p5	DUP	L_6ma	-0.0182155	0.00498637	-3.65306	0.000259184	712020	712052	3002	26593	13216	4607
regional_specificity_threshold	Z0p5	DUP	L_7Am	-0.0128872	0.00606197	-2.12592	0.0335112	712023	712054	1830	15253	9118	2979
regional_specificity_threshold	Z0p5	DUP	L_7PL	-0.00877673	0.00571827	-1.53486	0.12482	712023	712054	2529	20478	11610	4053
regional_specificity_threshold	Z0p5	DUP	L_7PC	-0.0359485	0.00519768	-6.91625	4.64812e-12	711998	712029	2213	19186	9533	3639
regional_specificity_threshold	Z0p5	DUP	L_LIPv	-0.0201869	0.005482	-3.68239	0.000231104	712020	712051	2180	18261	9721	3453
regional_specificity_threshold	Z0p5	DUP	L_VIP	-0.0217388	0.00470135	-4.62394	3.76694e-06	712017	712048	2946	25325	12274	4700
regional_specificity_threshold	Z0p5	DUP	L_MIP	-0.0146503	0.00482487	-3.03642	0.00239429	712022	712054	2698	26521	12957	4280
regional_specificity_threshold	Z0p5	DUP	L_1	-0.0364133	0.00521757	-6.97898	2.98051e-12	711997	712028	2505	20880	10897	3968
regional_specificity_threshold	Z0p5	DUP	L_2	-0.0212625	0.00608016	-3.49703	0.000470554	712020	712051	1898	17175	9758	3025
regional_specificity_threshold	Z0p5	DUP	L_3a	-0.0124962	0.0045262	-2.76086	0.00576527	712023	712054	3026	27087	12789	4748
regional_specificity_threshold	Z0p5	DUP	L_6d	-0.00908846	0.00516384	-1.76002	0.0784058	712023	712054	2438	22986	11361	3804
regional_specificity_threshold	Z0p5	DUP	L_6mp	-0.0260778	0.0054268	-4.80537	1.54551e-06	712014	712046	2436	20734	10120	3823
regional_specificity_threshold	Z0p5	DUP	L_6v	-0.0313768	0.00650983	-4.81991	1.43702e-06	712012	712044	2316	18975	11575	3644
regional_specificity_threshold	Z0p5	DUP	L_p24pr	-0.00569735	0.00453453	-1.25644	0.208959	712022	712054	3251	30504	14442	5057
regional_specificity_threshold	Z0p5	DUP	L_33pr	-0.00445093	0.00388401	-1.14596	0.251812	712021	712052	3227	29181	13528	5049
regional_specificity_threshold	Z0p5	DUP	L_a24pr	-0.0204708	0.00373623	-5.479	4.28139e-08	712015	712046	3440	31566	13116	5464
regional_specificity_threshold	Z0p5	DUP	L_p32pr	-0.023531	0.00346143	-6.79806	1.06266e-11	712007	712038	3627	32612	14766	5763
regional_specificity_threshold	Z0p5	DUP	L_a24	-0.0299353	0.00495334	-6.04346	1.51048e-09	712007	712038	2718	24028	12035	4370
regional_specificity_threshold	Z0p5	DUP	L_d32	-0.0160642	0.00488821	-3.28632	0.0010152	712022	712053	2993	24144	12454	4671
regional_specificity_threshold	Z0p5	DUP	L_8BM	-0.0410276	0.00526898	-7.78664	6.90689e-15	711988	712019	2638	21585	11655	4187
regional_specificity_threshold	Z0p5	DUP	L_p32	-0.0201125	0.00353165	-5.69494	1.2355e-08	712015	712046	3752	34937	15510	5901
regional_specificity_threshold	Z0p5	DUP	L_10r	-0.0335844	0.00569375	-5.89847	3.67349e-09	712006	712037	2382	21528	11194	3786
regional_specificity_threshold	Z0p5	DUP	L_47m	-0.0147877	0.00413612	-3.57526	0.000349938	712022	712053	3261	30762	14977	5198
regional_specificity_threshold	Z0p5	DUP	L_8Av	-0.00733937	0.00597055	-1.22926	0.218975	712023	712054	2129	19992	10630	3350
regional_specificity_threshold	Z0p5	DUP	L_8Ad	-0.0228233	0.00378996	-6.02203	1.72474e-09	712011	712043	2845	26695	13775	4485
regional_specificity_threshold	Z0p5	DUP	L_9m	-0.0365537	0.00413151	-8.84754	9.00158e-19	711980	712012	2511	21715	11088	3925
regional_specificity_threshold	Z0p5	DUP	L_8BL	-0.0169225	0.00650835	-2.60013	0.00931943	712022	712053	1420	12755	7147	2179
regional_specificity_threshold	Z0p5	DUP	L_9p	-0.0205073	0.00375028	-5.46822	4.54999e-08	712015	712046	2754	25466	11043	4395
regional_specificity_threshold	Z0p5	DUP	L_10d	-0.0217468	0.0033405	-6.51003	7.52719e-11	712010	712041	3745	34500	16072	5878
regional_specificity_threshold	Z0p5	DUP	L_8C	-0.0238054	0.00562369	-4.23305	2.30626e-05	712017	712048	2423	21716	12736	3847
regional_specificity_threshold	Z0p5	DUP	L_44	-0.0324284	0.00395833	-8.19244	2.57142e-16	711990	712021	2348	21974	10599	3752
regional_specificity_threshold	Z0p5	DUP	L_45	-0.0200621	0.00546444	-3.67139	0.000241287	712020	712051	2654	26251	15127	4120
regional_specificity_threshold	Z0p5	DUP	L_47l	-0.0286227	0.00449728	-6.36445	1.9632e-10	712005	712037	2995	27782	13354	4744
regional_specificity_threshold	Z0p5	DUP	L_a47r	-0.0236528	0.00811643	-2.91418	0.0035665	712020	712052	1038	9506	6027	1606
regional_specificity_threshold	Z0p5	DUP	L_6r	-0.0185092	0.00421663	-4.38957	1.13618e-05	712019	712050	2977	31730	15496	4608
regional_specificity_threshold	Z0p5	DUP	L_IFJa	-0.0195319	0.00353786	-5.52084	3.37702e-08	712016	712047	3775	35456	15750	5984
regional_specificity_threshold	Z0p5	DUP	L_IFJp	-0.0213537	0.00454837	-4.69481	2.6699e-06	712017	712048	3284	29294	16102	5065
regional_specificity_threshold	Z0p5	DUP	L_IFSp	-0.0265983	0.00540107	-4.92463	8.45718e-07	712014	712045	2437	18974	9983	3920
regional_specificity_threshold	Z0p5	DUP	L_IFSa	-0.0291138	0.00303849	-9.58169	9.62716e-22	711981	712012	3780	32418	14467	6066
regional_specificity_threshold	Z0p5	DUP	L_p9.46v	-0.0245516	0.00251134	-9.77628	1.43637e-22	711986	712017	4430	40993	17740	7065
regional_specificity_threshold	Z0p5	DUP	L_46	-0.0311057	0.00323938	-9.60238	7.87783e-22	711978	712009	3160	29135	13085	5044
regional_specificity_threshold	Z0p5	DUP	L_a9.46v	-0.0259469	0.00475278	-5.45931	4.78423e-08	712012	712043	2528	24167	11850	4007
regional_specificity_threshold	Z0p5	DUP	L_9.46d	-0.0315146	0.00412386	-7.64203	2.14562e-14	711995	712026	2693	24836	11416	4315
regional_specificity_threshold	Z0p5	DUP	L_9a	-0.0254382	0.00778142	-3.2691	0.00107905	712019	712051	1522	14028	10087	2460
regional_specificity_threshold	Z0p5	DUP	L_10v	-0.0298063	0.00380015	-7.84345	4.40008e-15	711995	712026	2799	25752	13818	4521
regional_specificity_threshold	Z0p5	DUP	L_a10p	-0.0247359	0.0039275	-6.29813	3.01732e-10	712009	712040	3720	32766	15895	5923
regional_specificity_threshold	Z0p5	DUP	L_10pp	-0.022381	0.00366242	-6.11099	9.9157e-10	712011	712043	2482	24709	12666	3946
regional_specificity_threshold	Z0p5	DUP	L_11l	-0.0142647	0.00658489	-2.16627	0.0302914	712023	712054	1802	16243	10357	2813
regional_specificity_threshold	Z0p5	DUP	L_13l	-0.041886	0.00598135	-7.00276	2.51586e-12	711994	712026	1827	14474	8147	2996
regional_specificity_threshold	Z0p5	DUP	L_OFC	-0.0307652	0.00416667	-7.38364	1.54474e-13	711997	712029	2187	21204	11617	3485
regional_specificity_threshold	Z0p5	DUP	L_47s	-0.0199597	0.00636068	-3.13798	0.00170137	712021	712052	1963	16605	10654	3056
regional_specificity_threshold	Z0p5	DUP	L_LIPd	-0.0203494	0.00500732	-4.06394	4.82657e-05	712019	712050	2792	23330	12588	4486
regional_specificity_threshold	Z0p5	DUP	L_6a	-0.0220785	0.00683664	-3.22943	0.00124052	712020	712051	1634	14001	8164	2593
regional_specificity_threshold	Z0p5	DUP	L_i6.8	-0.0210577	0.00481913	-4.36962	1.24513e-05	712018	712049	2042	17731	8713	3228
regional_specificity_threshold	Z0p5	DUP	L_s6.8	-0.0302402	0.00438741	-6.8925	5.49455e-12	712001	712033	2556	22743	12246	4020
regional_specificity_threshold	Z0p5	DUP	L_43	-0.0337322	0.0045239	-7.45645	8.91615e-14	711995	712026	2132	22450	12854	3394
regional_specificity_threshold	Z0p5	DUP	L_OP4	-0.0160037	0.00609979	-2.62365	0.00869984	712022	712054	1652	13163	7646	2663
regional_specificity_threshold	Z0p5	DUP	L_OP1	-0.0125999	0.0105634	-1.19279	0.232952	712023	712054	987	8056	6786	1609
regional_specificity_threshold	Z0p5	DUP	L_OP2.3	-0.0281731	0.0041404	-6.80444	1.01662e-11	712003	712035	3468	29495	14394	5635
regional_specificity_threshold	Z0p5	DUP	L_52	-0.0246678	0.0042997	-5.73709	9.64233e-09	712011	712043	2757	27523	12688	4344
regional_specificity_threshold	Z0p5	DUP	L_RI	-0.0283931	0.00438859	-6.46977	9.83292e-11	712005	712036	3269	31296	15448	5293
regional_specificity_threshold	Z0p5	DUP	L_PFcm	-0.0238435	0.00347243	-6.86651	6.59397e-12	712006	712038	3590	32269	14300	5852
regional_specificity_threshold	Z0p5	DUP	L_PoI2	-0.0227184	0.00514966	-4.41164	1.02632e-05	712017	712048	2415	21608	12278	3816
regional_specificity_threshold	Z0p5	DUP	L_TA2	-0.0258209	0.00559215	-4.61734	3.88871e-06	712015	712046	1951	16975	9120	3117
regional_specificity_threshold	Z0p5	DUP	L_FOP4	-0.0288945	0.0049939	-5.78595	7.21865e-09	712008	712040	3086	28771	16023	4887
regional_specificity_threshold	Z0p5	DUP	L_MI	-0.02923	0.00548748	-5.32667	1.00113e-07	712011	712042	2630	20702	11802	4159
regional_specificity_threshold	Z0p5	DUP	L_Pir	-0.008704	0.00418288	-2.08086	0.0374473	712023	712054	3016	27321	14641	4712
regional_specificity_threshold	Z0p5	DUP	L_AVI	-0.0404475	0.00565022	-7.15857	8.17395e-13	711994	712025	2422	21749	12363	3830
regional_specificity_threshold	Z0p5	DUP	L_AAIC	-0.0236419	0.00757995	-3.11901	0.00181479	712020	712051	1520	13151	9320	2375
regional_specificity_threshold	Z0p5	DUP	L_FOP1	-0.0298888	0.00409923	-7.29132	3.07815e-13	711999	712030	2905	26352	13134	4643
regional_specificity_threshold	Z0p5	DUP	L_FOP3	-0.0237875	0.00453278	-5.24787	1.5399e-07	712014	712045	2918	26215	12997	4644
regional_specificity_threshold	Z0p5	DUP	L_FOP2	-0.0226551	0.00462023	-4.90344	9.42282e-07	712015	712047	3099	25321	12795	4960
regional_specificity_threshold	Z0p5	DUP	L_PFt	-0.0268364	0.00477335	-5.62212	1.88819e-08	712010	712042	3197	29068	14772	5126
regional_specificity_threshold	Z0p5	DUP	L_AIP	-0.0273308	0.0043271	-6.3162	2.685e-10	712007	712038	2691	22395	9773	4289
regional_specificity_threshold	Z0p5	DUP	L_EC	-0.0109937	0.00423389	-2.5966	0.00941572	712023	712054	3275	28202	14441	5102
regional_specificity_threshold	Z0p5	DUP	L_PreS	-0.0101379	0.00417343	-2.42916	0.0151344	712023	712054	3170	28615	13516	5007
regional_specificity_threshold	Z0p5	DUP	L_H	-0.00925172	0.00462158	-2.00185	0.045302	712023	712054	3259	27859	14053	5127
regional_specificity_threshold	Z0p5	DUP	L_ProS	-0.0239326	0.0061603	-3.88497	0.000102368	712018	712049	2045	18911	10476	3321
regional_specificity_threshold	Z0p5	DUP	L_PeEc	-0.0131646	0.00449913	-2.92602	0.00343354	712023	712054	2802	27235	13297	4427
regional_specificity_threshold	Z0p5	DUP	L_STGa	-0.0385138	0.00504335	-7.63655	2.23885e-14	711990	712022	2515	21971	12259	4043
regional_specificity_threshold	Z0p5	DUP	L_PBelt	-0.00829759	0.0055692	-1.48991	0.13625	712023	712054	2065	18773	9541	3318
regional_specificity_threshold	Z0p5	DUP	L_A5	-0.0392708	0.00686965	-5.71656	1.08823e-08	712005	712036	1819	15209	8631	2869
regional_specificity_threshold	Z0p5	DUP	L_PHA1	-0.00766589	0.00403515	-1.89978	0.0574633	712023	712054	2535	21084	10177	4006
regional_specificity_threshold	Z0p5	DUP	L_PHA3	-0.0253348	0.00518013	-4.89077	1.00503e-06	712014	712046	2482	23801	11419	3993
regional_specificity_threshold	Z0p5	DUP	L_STSda	-0.0312557	0.00668482	-4.67563	2.93206e-06	712013	712044	1570	16013	9824	2485
regional_specificity_threshold	Z0p5	DUP	L_STSdp	-0.0483137	0.00642543	-7.51914	5.53161e-14	711987	712018	1865	15142	9312	3082
regional_specificity_threshold	Z0p5	DUP	L_STSvp	-0.03956	0.00541788	-7.30175	2.84852e-13	711993	712024	2320	19790	11384	3717
regional_specificity_threshold	Z0p5	DUP	L_TGd	-0.0282635	0.00477861	-5.91459	3.33119e-09	712008	712040	2432	23670	11849	3845
regional_specificity_threshold	Z0p5	DUP	L_TE1a	-0.0262908	0.00770408	-3.41258	0.000643613	712019	712050	1372	12418	7305	2155
regional_specificity_threshold	Z0p5	DUP	L_TE1p	-0.066106	0.00978856	-6.75339	1.44729e-11	711990	712021	943	7773	5167	1537
regional_specificity_threshold	Z0p5	DUP	L_TE2a	-0.0237117	0.00619695	-3.82635	0.000130085	712018	712050	1617	14732	8258	2523
regional_specificity_threshold	Z0p5	DUP	L_TF	-0.0301969	0.00458993	-6.57895	4.74696e-11	712003	712035	2074	22031	10727	3350
regional_specificity_threshold	Z0p5	DUP	L_TE2p	-0.0306022	0.00737061	-4.15192	3.29804e-05	712015	712047	1110	10798	6804	1748
regional_specificity_threshold	Z0p5	DUP	L_PHT	-0.0416329	0.00736293	-5.6544	1.56556e-08	712004	712036	1391	14029	8857	2273
regional_specificity_threshold	Z0p5	DUP	L_PH	-0.00352959	0.00903118	-0.390823	0.695929	712023	712054	961	10806	8032	1557
regional_specificity_threshold	Z0p5	DUP	L_TPOJ1	-0.0278578	0.00694653	-4.01032	6.06533e-05	712016	712048	1558	13903	7692	2523
regional_specificity_threshold	Z0p5	DUP	L_TPOJ2	-0.0312038	0.0073739	-4.23165	2.3206e-05	712015	712046	1408	12124	7281	2209
regional_specificity_threshold	Z0p5	DUP	L_TPOJ3	-0.0196026	0.00486713	-4.02754	5.63794e-05	712019	712051	2354	23051	11907	3816
regional_specificity_threshold	Z0p5	DUP	L_DVT	-0.0121109	0.0052523	-2.30583	0.0211207	712023	712054	2602	23503	11520	4197
regional_specificity_threshold	Z0p5	DUP	L_PGp	-0.0209525	0.00522256	-4.01192	6.02438e-05	712019	712050	2028	20694	10645	3256
regional_specificity_threshold	Z0p5	DUP	L_IP2	-0.0301436	0.0047917	-6.29079	3.1635e-10	712005	712036	2297	19355	9251	3668
regional_specificity_threshold	Z0p5	DUP	L_IP1	-0.0194198	0.00436317	-4.45084	8.55697e-06	712018	712050	2898	25698	12495	4646
regional_specificity_threshold	Z0p5	DUP	L_IP0	-0.0195109	0.0037843	-5.15576	2.52794e-07	712017	712048	3512	31161	14064	5697
regional_specificity_threshold	Z0p5	DUP	L_PFop	0.00162742	0.00553925	0.293797	0.768913	712019	712050	1703	17991	9772	2681
regional_specificity_threshold	Z0p5	DUP	L_PF	-0.0380991	0.00692786	-5.49941	3.81425e-08	712006	712038	1444	12891	7768	2381
regional_specificity_threshold	Z0p5	DUP	L_PFm	-0.0336711	0.00724131	-4.64986	3.3232e-06	712012	712044	1138	12437	7490	1860
regional_specificity_threshold	Z0p5	DUP	L_PGi	-0.0339298	0.00491918	-6.89744	5.30683e-12	711999	712030	2916	26236	14045	4579
regional_specificity_threshold	Z0p5	DUP	L_PGs	-0.0239706	0.00728224	-3.29166	0.000996123	712019	712051	1615	13665	8735	2622
regional_specificity_threshold	Z0p5	DUP	L_V6A	-0.028349	0.00472232	-6.0032	1.93717e-09	712008	712039	3346	27386	13607	5380
regional_specificity_threshold	Z0p5	DUP	L_VMV1	-0.0170791	0.00379219	-4.50375	6.67935e-06	712020	712051	2851	25211	10297	4571
regional_specificity_threshold	Z0p5	DUP	L_VMV3	-0.018097	0.00605985	-2.98638	0.00282327	712021	712053	1731	15432	9159	2779
regional_specificity_threshold	Z0p5	DUP	L_PHA2	-0.0177673	0.00492912	-3.60456	0.000312741	712021	712052	2969	27758	14597	4736
regional_specificity_threshold	Z0p5	DUP	L_V4t	-0.0164564	0.00402886	-4.08464	4.4159e-05	712020	712052	3972	35504	16352	6264
regional_specificity_threshold	Z0p5	DUP	L_FST	-0.0369499	0.00846871	-4.3631	1.28279e-05	712013	712044	1368	10906	7540	2238
regional_specificity_threshold	Z0p5	DUP	L_V3CD	-0.0228203	0.00651058	-3.50511	0.000456496	712019	712051	1950	16237	9786	3188
regional_specificity_threshold	Z0p5	DUP	L_LO3	-0.0124334	0.00438075	-2.83819	0.00453733	712023	712054	3222	26170	14055	5147
regional_specificity_threshold	Z0p5	DUP	L_VMV2	-0.010383	0.0055832	-1.85969	0.0629307	712023	712054	2109	19516	9766	3410
regional_specificity_threshold	Z0p5	DUP	L_31pd	-0.016996	0.00588353	-2.88875	0.00386808	712022	712053	1865	16953	9508	2882
regional_specificity_threshold	Z0p5	DUP	L_31a	-0.0314504	0.00688768	-4.56619	4.96907e-06	712013	712045	1572	14019	7626	2527
regional_specificity_threshold	Z0p5	DUP	L_VVC	-0.0156205	0.00404013	-3.86634	0.000110507	712021	712053	2666	21378	9336	4232
regional_specificity_threshold	Z0p5	DUP	L_25	-0.0306893	0.0058043	-5.28733	1.24214e-07	712010	712042	2369	19918	10972	3760
regional_specificity_threshold	Z0p5	DUP	L_s32	-0.0284406	0.00332444	-8.55498	1.18516e-17	711991	712022	3792	33585	15028	6061
regional_specificity_threshold	Z0p5	DUP	L_pOFC	-0.0205194	0.00424807	-4.83028	1.36422e-06	712017	712048	3313	27097	12919	5171
regional_specificity_threshold	Z0p5	DUP	L_PoI1	-0.0161245	0.0047656	-3.38352	0.000715739	712021	712053	2885	25046	13018	4560
regional_specificity_threshold	Z0p5	DUP	L_Ig	-0.0247165	0.00423065	-5.84224	5.15643e-09	712011	712042	2551	23762	11722	4075
regional_specificity_threshold	Z0p5	DUP	L_FOP5	-0.00622479	0.00431037	-1.44414	0.1487	712022	712054	3217	28118	13390	4984
regional_specificity_threshold	Z0p5	DUP	L_p10p	-0.0202837	0.00378017	-5.36581	8.06568e-08	712015	712047	2739	25540	12736	4318
regional_specificity_threshold	Z0p5	DUP	L_p47r	-0.0211442	0.00461324	-4.58337	4.57748e-06	712017	712049	2556	23962	12314	4004
regional_specificity_threshold	Z0p5	DUP	L_TGv	-0.02276	0.00435564	-5.22542	1.73898e-07	712014	712046	2676	26614	12462	4275
regional_specificity_threshold	Z0p5	DUP	L_MBelt	-0.0100689	0.0052278	-1.92603	0.0541019	712023	712054	2046	20370	10542	3300
regional_specificity_threshold	Z0p5	DUP	L_LBelt	-0.00552902	0.00416768	-1.32664	0.184628	712022	712053	3552	29901	15223	5582
regional_specificity_threshold	Z0p5	DUP	L_A4	-0.0339453	0.00765806	-4.43262	9.31335e-06	712013	712045	1555	13961	8676	2511
regional_specificity_threshold	Z0p5	DUP	L_STSva	-0.020561	0.00420199	-4.89316	9.92915e-07	712017	712048	2815	25863	12254	4464
regional_specificity_threshold	Z0p5	DUP	L_TE1m	-0.0477092	0.00609769	-7.82416	5.12991e-15	711984	712016	1622	17415	10818	2596
regional_specificity_threshold	Z0p5	DUP	L_PI	-0.0208401	0.00467447	-4.45829	8.26514e-06	712018	712049	2544	24870	12262	3986
regional_specificity_threshold	Z0p5	DUP	L_a32pr	-0.0144246	0.00380338	-3.79258	0.000149127	712022	712053	3156	30843	14372	4905
regional_specificity_threshold	Z0p5	DUP	L_p24	-0.0277806	0.00430851	-6.44785	1.13649e-10	712006	712037	3048	28356	12818	4816
regional_specificity_threshold	Z0p8	DEL	L_V1	-0.0694788	0.0086342	-8.04693	8.52493e-16	711981	712012	1154	9275	6962	3664
regional_specificity_threshold	Z0p8	DEL	L_MST	-0.0182001	0.0171499	-1.06123	0.288584	712013	712044	297	2942	2744	959
regional_specificity_threshold	Z0p8	DEL	L_V6	-0.0740871	0.00773862	-9.57369	1.04016e-21	711965	711996	1207	8815	5396	3811
regional_specificity_threshold	Z0p8	DEL	L_V2	-0.088569	0.00922347	-9.60257	7.8635e-22	711958	711990	1024	7438	5246	3229
regional_specificity_threshold	Z0p8	DEL	L_V3	-0.0402525	0.0127065	-3.16787	0.00153577	712011	712042	704	4621	3727	2233
regional_specificity_threshold	Z0p8	DEL	L_V4	-0.116379	0.0139826	-8.32312	8.60861e-17	711966	711998	799	4156	3110	2520
regional_specificity_threshold	Z0p8	DEL	L_V8	-0.0309728	0.0100512	-3.08152	0.00205971	712012	712043	1100	6931	5361	3564
regional_specificity_threshold	Z0p8	DEL	L_4	-0.0795129	0.0149107	-5.33262	9.68849e-08	711998	712029	689	2999	1996	2131
regional_specificity_threshold	Z0p8	DEL	L_3b	-0.120088	0.013993	-8.58201	9.37304e-18	711963	711994	696	3773	2806	2300
regional_specificity_threshold	Z0p8	DEL	L_FEF	-0.0165039	0.0135247	-1.22028	0.222359	712013	712044	633	3555	2725	1939
regional_specificity_threshold	Z0p8	DEL	L_PEF	-0.0725356	0.00762833	-9.50871	1.94617e-21	711966	711997	1730	8821	4787	5547
regional_specificity_threshold	Z0p8	DEL	L_55b	-0.08399	0.0095357	-8.80795	1.28215e-18	711969	712000	1117	6293	4175	3431
regional_specificity_threshold	Z0p8	DEL	L_V3A	-0.0777222	0.0108511	-7.16258	7.9382e-13	711986	712017	910	6631	5189	2953
regional_specificity_threshold	Z0p8	DEL	L_RSC	-0.010185	0.0161419	-0.630968	0.528062	712012	712044	597	2870	2062	1742
regional_specificity_threshold	Z0p8	DEL	L_POS2	-0.0700418	0.0130848	-5.35291	8.66245e-08	711999	712030	584	5056	4509	1748
regional_specificity_threshold	Z0p8	DEL	L_V7	-0.0260129	0.00698645	-3.72333	0.000196652	712013	712044	1645	12150	8085	4890
regional_specificity_threshold	Z0p8	DEL	L_IPS1	-0.0779712	0.00788585	-9.88748	4.76219e-23	711959	711991	1312	9294	6156	4256
regional_specificity_threshold	Z0p8	DEL	L_FFC	-0.0603116	0.0115359	-5.22818	1.71323e-07	712001	712033	817	3545	1992	2670
regional_specificity_threshold	Z0p8	DEL	L_V3B	-0.0531586	0.00764028	-6.95768	3.46732e-12	711995	712026	1704	10045	6466	5060
regional_specificity_threshold	Z0p8	DEL	L_LO1	-0.0612766	0.00621051	-9.86661	5.86401e-23	711969	712000	1671	10226	5645	5269
regional_specificity_threshold	Z0p8	DEL	L_LO2	-0.0676251	0.00686364	-9.85266	6.73785e-23	711965	711996	1448	12159	7949	4419
regional_specificity_threshold	Z0p8	DEL	L_PIT	-0.0304371	0.00779964	-3.90237	9.52795e-05	712012	712043	1352	9061	6674	4205
regional_specificity_threshold	Z0p8	DEL	L_MT	-0.0377382	0.00701173	-5.38215	7.36633e-08	712007	712039	1520	12135	8211	4668
regional_specificity_threshold	Z0p8	DEL	L_A1	-0.0753176	0.0115208	-6.53755	6.26491e-11	711991	712022	1178	5610	4007	3528
regional_specificity_threshold	Z0p8	DEL	L_PSL	-0.0809694	0.0250512	-3.23216	0.00122874	712007	712039	286	1105	805	932
regional_specificity_threshold	Z0p8	DEL	L_SFL	-0.0531382	0.0208159	-2.55277	0.0106877	712011	712042	427	1560	1151	1359
regional_specificity_threshold	Z0p8	DEL	L_PCV	-0.109523	0.0259211	-4.22523	2.3878e-05	712001	712033	291	1278	1023	993
regional_specificity_threshold	Z0p8	DEL	L_STV	-0.0275191	0.0251002	-1.09637	0.272919	712013	712044	255	1317	1056	825
regional_specificity_threshold	Z0p8	DEL	L_7Pm	-0.11594	0.0138185	-8.3902	4.87705e-17	711966	711997	653	4363	3486	2069
regional_specificity_threshold	Z0p8	DEL	L_7m	-0.0597954	0.0225962	-2.64626	0.00813923	712010	712041	332	1422	1084	1039
regional_specificity_threshold	Z0p8	DEL	L_POS1	-0.0322361	0.0189558	-1.70059	0.0890208	712013	712044	314	2658	2497	1032
regional_specificity_threshold	Z0p8	DEL	L_23d	-0.0738587	0.00650734	-11.3501	7.5321e-30	711944	711975	1341	11298	6743	4206
regional_specificity_threshold	Z0p8	DEL	L_v23ab	-0.051349	0.0106106	-4.83941	1.30297e-06	712005	712036	987	5926	4388	2998
regional_specificity_threshold	Z0p8	DEL	L_d23ab	-0.0346619	0.0118954	-2.91389	0.00356982	712012	712043	949	4301	2794	3042
regional_specificity_threshold	Z0p8	DEL	L_31pv	-0.0812055	0.0157501	-5.15588	2.52621e-07	711998	712030	572	2737	1905	1815
regional_specificity_threshold	Z0p8	DEL	L_5m	-0.1376	0.0158978	-8.65526	4.94521e-18	711959	711991	671	3497	2763	2027
regional_specificity_threshold	Z0p8	DEL	L_5mv	-0.040074	0.0105548	-3.79677	0.000146626	712010	712041	974	7574	6146	2970
regional_specificity_threshold	Z0p8	DEL	L_23c	-0.0414562	0.0203778	-2.03438	0.0419144	712012	712043	411	1766	1439	1248
regional_specificity_threshold	Z0p8	DEL	L_5L	-0.0818266	0.0114389	-7.15334	8.49144e-13	711985	712016	894	5258	3842	2749
regional_specificity_threshold	Z0p8	DEL	L_24dd	-0.0808874	0.0171213	-4.72438	2.30938e-06	712001	712032	649	2651	2054	1993
regional_specificity_threshold	Z0p8	DEL	L_24dv	-0.0538427	0.0185615	-2.90077	0.00372283	712010	712041	450	1982	1586	1415
regional_specificity_threshold	Z0p8	DEL	L_7AL	-0.0818566	0.0136856	-5.98124	2.21741e-09	711993	712025	371	4483	3967	1132
regional_specificity_threshold	Z0p8	DEL	L_SCEF	-0.106338	0.0176584	-6.02196	1.72548e-09	711990	712021	526	3025	2625	1723
regional_specificity_threshold	Z0p8	DEL	L_6ma	-0.0745969	0.0116415	-6.40783	1.47857e-10	711992	712023	973	5445	3876	2785
regional_specificity_threshold	Z0p8	DEL	L_7Am	-0.0698705	0.0137087	-5.09679	3.45695e-07	712000	712032	530	3216	2513	1571
regional_specificity_threshold	Z0p8	DEL	L_7PL	-0.0641738	0.00944739	-6.79276	1.10247e-11	711992	712023	969	7473	5357	2753
regional_specificity_threshold	Z0p8	DEL	L_7PC	-0.0653016	0.0163718	-3.98866	6.64666e-05	712006	712037	547	2537	1756	1882
regional_specificity_threshold	Z0p8	DEL	L_LIPv	-0.0942652	0.00885986	-10.6396	1.97479e-26	711943	711974	732	6179	3699	2177
regional_specificity_threshold	Z0p8	DEL	L_VIP	-0.102165	0.00984401	-10.3784	3.14398e-25	711944	711975	842	6192	3833	2649
regional_specificity_threshold	Z0p8	DEL	L_MIP	-0.0197666	0.0094396	-2.09401	0.0362605	712013	712044	1068	8465	6689	3319
regional_specificity_threshold	Z0p8	DEL	L_1	-0.124088	0.0130996	-9.47266	2.74984e-21	711951	711982	725	4005	2765	2333
regional_specificity_threshold	Z0p8	DEL	L_2	-0.141657	0.0144406	-9.80967	1.03246e-22	711943	711974	436	3314	2431	1481
regional_specificity_threshold	Z0p8	DEL	L_3a	-0.0700348	0.0101323	-6.91206	4.78757e-12	711989	712021	1118	5925	4020	3499
regional_specificity_threshold	Z0p8	DEL	L_6d	-0.117576	0.0137146	-8.57307	1.01301e-17	711963	711995	734	4303	3149	2322
regional_specificity_threshold	Z0p8	DEL	L_6mp	-0.0580675	0.0131511	-4.41541	1.0086e-05	712005	712037	732	3509	2334	2413
regional_specificity_threshold	Z0p8	DEL	L_6v	-0.115868	0.0145027	-7.98939	1.36157e-15	711970	712002	747	3976	3032	2311
regional_specificity_threshold	Z0p8	DEL	L_p24pr	-0.0373608	0.0088036	-4.24381	2.19833e-05	712010	712041	1375	9176	7030	4101
regional_specificity_threshold	Z0p8	DEL	L_33pr	-0.0312724	0.00937868	-3.33441	0.000854918	712012	712043	1377	6631	4394	4229
regional_specificity_threshold	Z0p8	DEL	L_a24pr	-0.0236719	0.00843644	-2.80591	0.00501779	712013	712044	1363	7548	5039	4466
regional_specificity_threshold	Z0p8	DEL	L_p32pr	-0.0433641	0.0080332	-5.39811	6.74056e-08	712005	712037	1377	8938	6317	4371
regional_specificity_threshold	Z0p8	DEL	L_a24	-0.0264618	0.00984054	-2.68906	0.00716582	712013	712044	1016	6656	5169	3243
regional_specificity_threshold	Z0p8	DEL	L_d32	-0.013303	0.0106536	-1.24869	0.211779	712012	712044	935	6439	5285	2884
regional_specificity_threshold	Z0p8	DEL	L_8BM	-0.032503	0.0131047	-2.48024	0.0131299	712012	712044	794	4166	3148	2467
regional_specificity_threshold	Z0p8	DEL	L_p32	-0.0259429	0.0064663	-4.01202	6.0218e-05	712013	712044	1583	10706	6233	5039
regional_specificity_threshold	Z0p8	DEL	L_10r	-0.0307405	0.0134902	-2.27872	0.0226844	712013	712044	647	4043	3266	2074
regional_specificity_threshold	Z0p8	DEL	L_47m	-0.0810645	0.00944465	-8.58312	9.28338e-18	711972	712003	1263	7941	5536	3883
regional_specificity_threshold	Z0p8	DEL	L_8Av	-0.0996717	0.0152127	-6.55186	5.69299e-11	711986	712018	675	3660	2934	2116
regional_specificity_threshold	Z0p8	DEL	L_8Ad	-0.0878231	0.0121212	-7.24543	4.32248e-13	711983	712014	844	4332	2941	2662
regional_specificity_threshold	Z0p8	DEL	L_9m	-0.0232733	0.0105607	-2.20376	0.027542	712013	712044	676	3573	2300	2087
regional_specificity_threshold	Z0p8	DEL	L_8BL	-0.0395979	0.0238906	-1.65747	0.0974266	712012	712044	280	1374	1140	828
regional_specificity_threshold	Z0p8	DEL	L_9p	-0.0485524	0.0103254	-4.70222	2.5748e-06	712006	712037	944	4452	2688	2959
regional_specificity_threshold	Z0p8	DEL	L_10d	-0.0549644	0.0088552	-6.20702	5.40788e-10	711998	712030	1367	7236	4623	4126
regional_specificity_threshold	Z0p8	DEL	L_8C	-0.0415087	0.015474	-2.68248	0.00730828	712011	712043	768	3209	2536	2347
regional_specificity_threshold	Z0p8	DEL	L_44	-0.0462305	0.0105145	-4.39684	1.09881e-05	712007	712039	666	3851	2475	2161
regional_specificity_threshold	Z0p8	DEL	L_45	-0.0692565	0.0128111	-5.40596	6.45209e-08	711999	712030	825	5698	4970	2454
regional_specificity_threshold	Z0p8	DEL	L_47l	-0.00554248	0.0105336	-0.52617	0.59877	712011	712042	1088	6369	4727	3257
regional_specificity_threshold	Z0p8	DEL	L_a47r	-0.0578297	0.0307144	-1.88282	0.0597255	712012	712043	152	737	636	449
regional_specificity_threshold	Z0p8	DEL	L_6r	-0.0671511	0.00988441	-6.79364	1.09575e-11	711991	712022	970	6573	4601	2958
regional_specificity_threshold	Z0p8	DEL	L_IFJa	-0.063262	0.00924677	-6.84152	7.85293e-12	711992	712023	1458	7296	4888	4591
regional_specificity_threshold	Z0p8	DEL	L_IFJp	-0.0468712	0.00984851	-4.75921	1.94454e-06	712006	712038	1283	7597	5579	3860
regional_specificity_threshold	Z0p8	DEL	L_IFSp	-0.0618214	0.0140215	-4.40903	1.03878e-05	712005	712036	640	3682	2716	2173
regional_specificity_threshold	Z0p8	DEL	L_IFSa	-0.0482257	0.00719537	-6.70232	2.05553e-11	711998	712030	1374	6791	3759	4353
regional_specificity_threshold	Z0p8	DEL	L_p9.46v	-0.0572672	0.0053865	-10.6316	2.15089e-26	711964	711996	2013	11925	6228	6419
regional_specificity_threshold	Z0p8	DEL	L_46	-0.0493679	0.00902351	-5.47102	4.47857e-08	712003	712035	944	4950	3020	3061
regional_specificity_threshold	Z0p8	DEL	L_a9.46v	-0.0572369	0.0130123	-4.39866	1.08963e-05	712005	712037	740	3450	2274	2301
regional_specificity_threshold	Z0p8	DEL	L_9.46d	-0.0272366	0.0124968	-2.17949	0.0292961	712013	712044	766	3224	2059	2435
regional_specificity_threshold	Z0p8	DEL	L_9a	-0.129898	0.0210784	-6.16261	7.1659e-10	711986	712018	328	2042	1911	1003
regional_specificity_threshold	Z0p8	DEL	L_10v	-0.0306951	0.00837787	-3.66384	0.000248516	712012	712043	886	4130	2369	2890
regional_specificity_threshold	Z0p8	DEL	L_a10p	-0.0584093	0.00738383	-7.91043	2.57507e-15	711987	712018	1331	11800	7930	4188
regional_specificity_threshold	Z0p8	DEL	L_10pp	-0.0165651	0.0108257	-1.53016	0.125978	712013	712044	665	5951	4631	1960
regional_specificity_threshold	Z0p8	DEL	L_11l	-0.0290307	0.0244202	-1.1888	0.23452	712013	712044	353	1336	1140	1004
regional_specificity_threshold	Z0p8	DEL	L_13l	-0.0301059	0.0191245	-1.5742	0.115441	712013	712044	504	1938	1568	1644
regional_specificity_threshold	Z0p8	DEL	L_OFC	-0.0113203	0.0134514	-0.841573	0.400028	712012	712044	610	4043	3271	1911
regional_specificity_threshold	Z0p8	DEL	L_47s	-0.00236587	0.0134958	-0.175304	0.860841	712011	712042	635	4038	3379	2010
regional_specificity_threshold	Z0p8	DEL	L_LIPd	-0.0450924	0.0104423	-4.31827	1.57318e-05	712008	712039	1046	5518	3909	3180
regional_specificity_threshold	Z0p8	DEL	L_6a	-0.101021	0.0193471	-5.22149	1.77622e-07	711996	712027	381	2273	1939	1151
regional_specificity_threshold	Z0p8	DEL	L_i6.8	-0.0411361	0.0168435	-2.44225	0.0145966	712012	712043	547	2099	1460	1685
regional_specificity_threshold	Z0p8	DEL	L_s6.8	-0.0351265	0.0124968	-2.81084	0.00494163	712012	712043	737	4842	3761	2302
regional_specificity_threshold	Z0p8	DEL	L_43	-0.0564784	0.0121654	-4.64256	3.44281e-06	712005	712036	594	3346	2054	1940
regional_specificity_threshold	Z0p8	DEL	L_OP4	-0.0743555	0.0176474	-4.2134	2.51637e-05	712004	712035	334	2316	1925	971
regional_specificity_threshold	Z0p8	DEL	L_OP1	-0.0370006	0.0564707	-0.655217	0.512328	712013	712044	75	276	265	232
regional_specificity_threshold	Z0p8	DEL	L_OP2.3	-0.0628686	0.00762899	-8.24075	1.71927e-16	711982	712014	1257	9572	5802	3956
regional_specificity_threshold	Z0p8	DEL	L_52	-0.0611869	0.00743005	-8.23506	1.80292e-16	711983	712014	1144	10599	6304	3610
regional_specificity_threshold	Z0p8	DEL	L_RI	-0.065727	0.00758246	-8.66829	4.41113e-18	711977	712009	1364	10959	7582	4249
regional_specificity_threshold	Z0p8	DEL	L_PFcm	-0.0583821	0.00827099	-7.05866	1.68535e-12	711992	712024	1529	8630	5998	4786
regional_specificity_threshold	Z0p8	DEL	L_PoI2	-0.0126377	0.00915179	-1.38089	0.167312	712012	712043	876	6232	3700	2608
regional_specificity_threshold	Z0p8	DEL	L_TA2	0.0199855	0.0159893	1.24993	0.211325	712006	712038	515	3351	2893	1606
regional_specificity_threshold	Z0p8	DEL	L_FOP4	-0.0278749	0.0101402	-2.74894	0.00597922	712013	712044	1145	6452	4492	3469
regional_specificity_threshold	Z0p8	DEL	L_MI	-0.00838308	0.0095299	-0.879661	0.379044	712011	712042	831	6116	3703	2534
regional_specificity_threshold	Z0p8	DEL	L_Pir	-0.0279195	0.00725466	-3.8485	0.000118874	712012	712044	1390	12137	8592	4078
regional_specificity_threshold	Z0p8	DEL	L_AVI	-0.00933899	0.0138902	-0.672342	0.501367	712012	712044	715	4161	3218	2173
regional_specificity_threshold	Z0p8	DEL	L_AAIC	-0.0177171	0.0193654	-0.914885	0.360253	712013	712044	291	2421	2216	876
regional_specificity_threshold	Z0p8	DEL	L_FOP1	-0.0214055	0.0104997	-2.03867	0.0414835	712013	712044	903	5029	3708	2816
regional_specificity_threshold	Z0p8	DEL	L_FOP3	-0.0383054	0.00820016	-4.6713	2.9945e-06	712009	712040	1179	8958	5835	3601
regional_specificity_threshold	Z0p8	DEL	L_FOP2	-0.0330581	0.00952696	-3.46995	0.000520636	712011	712043	1159	5929	3892	3819
regional_specificity_threshold	Z0p8	DEL	L_PFt	-0.0880191	0.0100092	-8.79384	1.45388e-18	711968	711999	1312	6685	4566	4092
regional_specificity_threshold	Z0p8	DEL	L_AIP	-0.0646378	0.0114649	-5.63789	1.72322e-08	711999	712030	851	4570	3255	2794
regional_specificity_threshold	Z0p8	DEL	L_EC	-0.0615344	0.00934165	-6.5871	4.4935e-11	711994	712025	1437	6715	4442	4171
regional_specificity_threshold	Z0p8	DEL	L_PreS	-0.0052291	0.00814599	-0.641923	0.520924	712009	712040	1450	10344	7982	4143
regional_specificity_threshold	Z0p8	DEL	L_H	-0.0557654	0.00953293	-5.84977	4.92844e-09	712000	712031	1492	7257	5099	4449
regional_specificity_threshold	Z0p8	DEL	L_ProS	-0.0896535	0.015962	-5.61667	1.94874e-08	711995	712026	545	3352	2670	1718
regional_specificity_threshold	Z0p8	DEL	L_PeEc	-0.0440141	0.00801751	-5.48975	4.02886e-08	712005	712036	1015	9212	5942	3251
regional_specificity_threshold	Z0p8	DEL	L_STGa	-0.0385742	0.010927	-3.53017	0.000415364	712011	712042	887	5493	4126	2828
regional_specificity_threshold	Z0p8	DEL	L_PBelt	-0.0603482	0.018399	-3.27996	0.00103834	712009	712040	591	2289	1668	1827
regional_specificity_threshold	Z0p8	DEL	L_A5	-0.0433077	0.0204107	-2.12181	0.0338546	712012	712043	404	1838	1598	1270
regional_specificity_threshold	Z0p8	DEL	L_PHA1	-0.00875174	0.00973499	-0.898998	0.368655	712011	712043	1119	5914	4319	3190
regional_specificity_threshold	Z0p8	DEL	L_PHA3	-0.00107284	0.00943557	-0.113702	0.909474	712008	712039	793	6288	3734	2496
regional_specificity_threshold	Z0p8	DEL	L_STSda	-0.00808846	0.018192	-0.444617	0.656597	712012	712044	336	2832	2597	1093
regional_specificity_threshold	Z0p8	DEL	L_STSdp	0.00138958	0.0188773	0.0736111	0.94132	712011	712043	474	2171	1678	1571
regional_specificity_threshold	Z0p8	DEL	L_STSvp	-0.00943423	0.0118621	-0.795323	0.426426	712012	712043	662	5233	4350	2203
regional_specificity_threshold	Z0p8	DEL	L_TGd	-0.0220159	0.00964574	-2.28245	0.0224634	712013	712044	703	5971	3698	2377
regional_specificity_threshold	Z0p8	DEL	L_TE1a	-0.106398	0.0300615	-3.53936	0.000401175	712005	712036	272	971	824	911
regional_specificity_threshold	Z0p8	DEL	L_TE1p	-0.0494506	0.0384267	-1.28688	0.198137	712012	712044	122	588	518	389
regional_specificity_threshold	Z0p8	DEL	L_TE2a	0.0317526	0.0263418	1.20541	0.228047	712009	712040	323	1238	1094	1025
regional_specificity_threshold	Z0p8	DEL	L_TF	-0.0167873	0.00993552	-1.68962	0.0911014	712013	712044	577	5089	3006	1831
regional_specificity_threshold	Z0p8	DEL	L_TE2p	-0.0834471	0.0253863	-3.2871	0.00101239	712007	712038	188	1056	850	625
regional_specificity_threshold	Z0p8	DEL	L_PHT	-0.0146576	0.0276008	-0.531057	0.59538	712013	712044	269	973	744	889
regional_specificity_threshold	Z0p8	DEL	L_PH	-0.0224225	0.0215675	-1.03964	0.298506	712013	712044	147	2029	1977	484
regional_specificity_threshold	Z0p8	DEL	L_TPOJ1	-0.0523899	0.0210477	-2.4891	0.0128073	712011	712042	294	1758	1526	924
regional_specificity_threshold	Z0p8	DEL	L_TPOJ2	-0.00996073	0.0155033	-0.64249	0.520556	712012	712044	301	1864	1361	969
regional_specificity_threshold	Z0p8	DEL	L_TPOJ3	-0.0328116	0.0106276	-3.08741	0.0020193	712012	712043	723	6105	4909	2290
regional_specificity_threshold	Z0p8	DEL	L_DVT	-0.0656655	0.0108156	-6.07138	1.26992e-09	711996	712027	974	5416	3773	3124
regional_specificity_threshold	Z0p8	DEL	L_PGp	-0.100555	0.0120261	-8.36139	6.22879e-17	711969	712000	463	4249	2762	1515
regional_specificity_threshold	Z0p8	DEL	L_IP2	-0.101871	0.0145993	-6.97781	3.00543e-12	711982	712014	618	3438	2588	2022
regional_specificity_threshold	Z0p8	DEL	L_IP1	-0.0710632	0.00960818	-7.39612	1.40643e-13	711986	712017	994	6026	4144	3127
regional_specificity_threshold	Z0p8	DEL	L_IP0	-0.0715752	0.00813747	-8.79576	1.42931e-18	711974	712005	1343	9682	6221	4280
regional_specificity_threshold	Z0p8	DEL	L_PFop	-0.102891	0.0115573	-8.90272	5.4836e-19	711962	711994	538	4952	3430	1791
regional_specificity_threshold	Z0p8	DEL	L_PF	-0.14757	0.0168167	-8.77523	1.71568e-18	711956	711988	225	2120	1692	724
regional_specificity_threshold	Z0p8	DEL	L_PFm	-0.047547	0.0212338	-2.23922	0.0251426	712011	712043	252	1229	864	805
regional_specificity_threshold	Z0p8	DEL	L_PGi	-0.0655855	0.0104202	-6.2941	3.09678e-10	711995	712026	1032	7537	6128	3207
regional_specificity_threshold	Z0p8	DEL	L_PGs	-0.137491	0.0186906	-7.35611	1.89899e-13	711974	712006	357	2581	2342	1087
regional_specificity_threshold	Z0p8	DEL	L_V6A	-0.0233887	0.00746981	-3.1311	0.00174174	712013	712044	1518	9559	6745	4655
regional_specificity_threshold	Z0p8	DEL	L_VMV1	-0.0312229	0.00862544	-3.61986	0.000294821	712012	712043	1138	6921	4737	3487
regional_specificity_threshold	Z0p8	DEL	L_VMV3	-0.0684461	0.0159631	-4.28776	1.80548e-05	712004	712036	612	3194	2705	1864
regional_specificity_threshold	Z0p8	DEL	L_PHA2	-0.0421794	0.00807582	-5.22293	1.7625e-07	712006	712038	1173	9382	6307	3631
regional_specificity_threshold	Z0p8	DEL	L_V4t	-0.0351291	0.0072269	-4.86088	1.16933e-06	712009	712041	1730	11649	8339	5457
regional_specificity_threshold	Z0p8	DEL	L_FST	-0.0187394	0.0152905	-1.22555	0.220367	712013	712044	413	3556	3190	1213
regional_specificity_threshold	Z0p8	DEL	L_V3CD	-0.154979	0.0180699	-8.57664	9.82114e-18	711958	711989	422	2717	2453	1292
regional_specificity_threshold	Z0p8	DEL	L_LO3	-0.0356203	0.00919489	-3.87393	0.000107122	712011	712042	1262	8205	6445	3739
regional_specificity_threshold	Z0p8	DEL	L_VMV2	-0.0953205	0.0125314	-7.60654	2.82482e-14	711978	712009	608	5260	4330	2007
regional_specificity_threshold	Z0p8	DEL	L_31pd	-0.104137	0.016247	-6.40961	1.46144e-10	711987	712018	557	3203	2614	1659
regional_specificity_threshold	Z0p8	DEL	L_31a	-0.0157905	0.0132669	-1.19022	0.23396	712013	712044	465	3465	2705	1505
regional_specificity_threshold	Z0p8	DEL	L_VVC	-0.0207185	0.00948992	-2.18321	0.0290214	712013	712044	1076	6028	4326	3198
regional_specificity_threshold	Z0p8	DEL	L_25	-0.0182831	0.0116725	-1.56635	0.117268	712013	712044	884	4740	3438	2795
regional_specificity_threshold	Z0p8	DEL	L_s32	-0.0411991	0.0078856	-5.2246	1.7467e-07	712007	712038	1460	8188	5123	4750
regional_specificity_threshold	Z0p8	DEL	L_pOFC	-0.0261213	0.00867693	-3.01043	0.00260904	712013	712044	1251	7960	5635	3906
regional_specificity_threshold	Z0p8	DEL	L_PoI1	-0.0182294	0.00768072	-2.3734	0.0176259	712013	712044	1194	8821	5642	3511
regional_specificity_threshold	Z0p8	DEL	L_Ig	-0.0278685	0.00960435	-2.90165	0.00371228	712013	712044	774	6082	3896	2508
regional_specificity_threshold	Z0p8	DEL	L_FOP5	-0.0461962	0.00953093	-4.84698	1.25428e-06	712006	712037	1220	6903	5072	3692
regional_specificity_threshold	Z0p8	DEL	L_p10p	-0.0267661	0.0107695	-2.48535	0.0129431	712013	712044	971	5709	4340	2931
regional_specificity_threshold	Z0p8	DEL	L_p47r	-0.0251843	0.0118262	-2.12954	0.0332102	712013	712044	758	5023	3922	2305
regional_specificity_threshold	Z0p8	DEL	L_TGv	-0.0218785	0.00851403	-2.56969	0.0101794	712013	712044	787	6995	4025	2556
regional_specificity_threshold	Z0p8	DEL	L_MBelt	-0.0288812	0.0157801	-1.83023	0.0672171	712013	712044	485	3408	2915	1513
regional_specificity_threshold	Z0p8	DEL	L_LBelt	-0.0417029	0.00819368	-5.08964	3.58987e-07	712007	712038	1584	9326	7099	4678
regional_specificity_threshold	Z0p8	DEL	L_A4	-0.0317223	0.0242993	-1.30548	0.191731	712013	712044	339	1530	1336	1036
regional_specificity_threshold	Z0p8	DEL	L_STSva	-0.0674004	0.0119471	-5.64158	1.68676e-08	711998	712029	980	5428	4170	3019
regional_specificity_threshold	Z0p8	DEL	L_TE1m	-0.0335275	0.0226418	-1.48078	0.138666	712013	712044	347	1460	1091	1083
regional_specificity_threshold	Z0p8	DEL	L_PI	-0.0134404	0.00874506	-1.53692	0.124315	712012	712043	870	6948	4445	2762
regional_specificity_threshold	Z0p8	DEL	L_a32pr	-0.0251228	0.00784652	-3.20177	0.00136601	712013	712044	1340	8450	5950	4003
regional_specificity_threshold	Z0p8	DEL	L_p24	-0.0363439	0.00892984	-4.06994	4.70401e-05	712010	712042	1099	7058	4689	3402
regional_specificity_threshold	Z0p8	DUP	L_V1	-0.0134906	0.00569138	-2.37036	0.0177715	712023	712054	2244	18169	10745	3664
regional_specificity_threshold	Z0p8	DUP	L_MST	-0.0351259	0.0129998	-2.70204	0.00689192	712019	712051	594	5121	4082	959
regional_specificity_threshold	Z0p8	DUP	L_V6	-0.0125526	0.00460266	-2.72725	0.00638689	712023	712054	2377	21938	11708	3811
regional_specificity_threshold	Z0p8	DUP	L_V2	-0.0159509	0.00604828	-2.63726	0.00835829	712022	712054	1987	16817	9765	3229
regional_specificity_threshold	Z0p8	DUP	L_V3	-0.0268365	0.00769895	-3.48573	0.000490874	712018	712050	1338	9882	5939	2233
regional_specificity_threshold	Z0p8	DUP	L_V4	-0.00466925	0.0072049	-0.648066	0.516943	712023	712054	1553	15573	9235	2520
regional_specificity_threshold	Z0p8	DUP	L_V8	-0.0151422	0.00691407	-2.19006	0.028521	712023	712054	2237	16134	10000	3564
regional_specificity_threshold	Z0p8	DUP	L_4	-0.00887145	0.00745674	-1.18972	0.234157	712023	712054	1372	11929	6996	2131
regional_specificity_threshold	Z0p8	DUP	L_3b	-0.0138081	0.00815747	-1.6927	0.0905139	712023	712054	1450	12411	9131	2300
regional_specificity_threshold	Z0p8	DUP	L_FEF	-0.0164907	0.0084967	-1.94083	0.0522796	712023	712054	1241	10520	6939	1939
regional_specificity_threshold	Z0p8	DUP	L_PEF	-0.0215545	0.00431841	-4.9913	6.00118e-07	712016	712047	3498	29055	13662	5547
regional_specificity_threshold	Z0p8	DUP	L_55b	-0.042426	0.00610522	-6.94914	3.68388e-12	711994	712026	2173	18478	11140	3431
regional_specificity_threshold	Z0p8	DUP	L_V3A	-0.0356525	0.0064986	-5.48618	4.11092e-08	712007	712039	1819	15386	9279	2953
regional_specificity_threshold	Z0p8	DUP	L_RSC	-0.0266992	0.00858784	-3.10896	0.00187769	712019	712051	1093	10716	6126	1742
regional_specificity_threshold	Z0p8	DUP	L_POS2	-0.0129317	0.00915468	-1.41258	0.157781	712023	712054	1073	9034	7244	1748
regional_specificity_threshold	Z0p8	DUP	L_V7	-0.0256485	0.00483737	-5.30215	1.1454e-07	712012	712044	3091	26460	14796	4890
regional_specificity_threshold	Z0p8	DUP	L_IPS1	-0.0337822	0.00468255	-7.2145	5.4281e-13	711997	712028	2646	23151	12075	4256
regional_specificity_threshold	Z0p8	DUP	L_FFC	-0.0319114	0.00659812	-4.83644	1.32261e-06	712012	712043	1647	13906	7219	2670
regional_specificity_threshold	Z0p8	DUP	L_V3B	-0.0105278	0.00446636	-2.35713	0.0184177	712023	712054	3197	26077	14083	5060
regional_specificity_threshold	Z0p8	DUP	L_LO1	-0.0251528	0.00367363	-6.84686	7.56564e-12	712005	712037	3241	28780	13361	5269
regional_specificity_threshold	Z0p8	DUP	L_LO2	-0.014758	0.0047896	-3.08125	0.00206155	712022	712053	2741	27189	15323	4419
regional_specificity_threshold	Z0p8	DUP	L_PIT	-0.023185	0.00508669	-4.55798	5.16715e-06	712016	712048	2608	22137	12928	4205
regional_specificity_threshold	Z0p8	DUP	L_MT	-0.00511527	0.00419583	-1.21913	0.222795	712022	712053	2919	28521	13288	4668
regional_specificity_threshold	Z0p8	DUP	L_A1	0.00288	0.00616821	0.46691	0.640565	712019	712050	2287	20676	11881	3528
regional_specificity_threshold	Z0p8	DUP	L_PSL	-0.0565375	0.0142191	-3.97615	7.00577e-05	712012	712044	578	4436	3670	932
regional_specificity_threshold	Z0p8	DUP	L_SFL	-0.0498764	0.0114302	-4.36357	1.28006e-05	712011	712042	857	4818	3651	1359
regional_specificity_threshold	Z0p8	DUP	L_PCV	-0.029773	0.0133008	-2.23844	0.0251934	712021	712052	612	4900	3640	993
regional_specificity_threshold	Z0p8	DUP	L_STV	-0.0824217	0.0146553	-5.62403	1.86743e-08	711999	712030	483	3696	2700	825
regional_specificity_threshold	Z0p8	DUP	L_7Pm	-0.00512464	0.00890826	-0.575268	0.56511	712023	712054	1278	11409	8155	2069
regional_specificity_threshold	Z0p8	DUP	L_7m	-0.0440761	0.00939116	-4.69336	2.68888e-06	712010	712041	677	7719	5453	1039
regional_specificity_threshold	Z0p8	DUP	L_POS1	-0.0376226	0.0132019	-2.84979	0.0043752	712019	712050	603	4932	4124	1032
regional_specificity_threshold	Z0p8	DUP	L_23d	-0.0239892	0.00416106	-5.76517	8.16696e-09	712011	712043	2607	25536	12086	4206
regional_specificity_threshold	Z0p8	DUP	L_v23ab	-0.0335097	0.00612754	-5.46871	4.53742e-08	712008	712040	1901	16570	9889	2998
regional_specificity_threshold	Z0p8	DUP	L_d23ab	-0.0284598	0.00692321	-4.11078	3.9444e-05	712016	712047	1895	16702	9799	3042
regional_specificity_threshold	Z0p8	DUP	L_31pv	-0.0214688	0.00794162	-2.70332	0.00686543	712021	712052	1096	10715	5823	1815
regional_specificity_threshold	Z0p8	DUP	L_5m	0.00426925	0.00895317	0.476842	0.633475	712021	712052	1306	11985	8407	2027
regional_specificity_threshold	Z0p8	DUP	L_5mv	-0.0208122	0.00676861	-3.07481	0.00210659	712021	712052	1861	15584	10224	2970
regional_specificity_threshold	Z0p8	DUP	L_23c	-0.0767051	0.0112656	-6.8088	9.86271e-12	711988	712019	777	6723	5269	1248
regional_specificity_threshold	Z0p8	DUP	L_5L	-0.00764073	0.00590098	-1.29482	0.195382	712023	712054	1744	15790	9200	2749
regional_specificity_threshold	Z0p8	DUP	L_24dd	-0.0355141	0.00799745	-4.44069	8.97097e-06	712013	712044	1246	11949	8968	1993
regional_specificity_threshold	Z0p8	DUP	L_24dv	-0.0109611	0.0100403	-1.09171	0.274963	712023	712054	908	7731	6121	1415
regional_specificity_threshold	Z0p8	DUP	L_7AL	-0.0131689	0.00986684	-1.33466	0.181989	712023	712054	717	7974	5659	1132
regional_specificity_threshold	Z0p8	DUP	L_SCEF	-0.00169649	0.00980794	-0.172971	0.862674	712022	712054	1071	9452	7119	1723
regional_specificity_threshold	Z0p8	DUP	L_6ma	-0.0198039	0.00640185	-3.09347	0.0019785	712021	712052	1809	17570	9815	2785
regional_specificity_threshold	Z0p8	DUP	L_7Am	-0.0107747	0.00933689	-1.154	0.248503	712023	712054	960	7593	5259	1571
regional_specificity_threshold	Z0p8	DUP	L_7PL	-0.0132315	0.00652608	-2.02749	0.0426138	712023	712054	1744	14632	9205	2753
regional_specificity_threshold	Z0p8	DUP	L_7PC	-0.0375065	0.00767645	-4.88592	1.0301e-06	712010	712042	1114	9795	5639	1882
regional_specificity_threshold	Z0p8	DUP	L_LIPv	-0.00317731	0.00680932	-0.466612	0.640778	712022	712053	1375	12038	6958	2177
regional_specificity_threshold	Z0p8	DUP	L_VIP	-0.0164341	0.00612683	-2.68232	0.00731173	712022	712053	1667	16909	9507	2649
regional_specificity_threshold	Z0p8	DUP	L_MIP	-0.0108433	0.00578742	-1.8736	0.0609861	712023	712054	2119	19154	10214	3319
regional_specificity_threshold	Z0p8	DUP	L_1	-0.0260024	0.00719495	-3.61397	0.000301599	712018	712050	1482	13352	8640	2333
regional_specificity_threshold	Z0p8	DUP	L_2	-0.0144338	0.0095117	-1.51748	0.129147	712023	712054	938	9170	6667	1481
regional_specificity_threshold	Z0p8	DUP	L_3a	-0.0157634	0.00581411	-2.71124	0.00670369	712022	712054	2236	19500	10303	3499
regional_specificity_threshold	Z0p8	DUP	L_6d	-0.00225759	0.00664709	-0.339635	0.734131	712022	712053	1489	15157	8471	2322
regional_specificity_threshold	Z0p8	DUP	L_6mp	-0.0402608	0.00707251	-5.69258	1.25272e-08	712005	712036	1550	13405	7612	2413
regional_specificity_threshold	Z0p8	DUP	L_6v	-0.0197557	0.00846271	-2.33444	0.0195733	712022	712053	1462	12470	8452	2311
regional_specificity_threshold	Z0p8	DUP	L_p24pr	-0.011621	0.00558345	-2.08133	0.0374049	712023	712054	2608	22482	12244	4101
regional_specificity_threshold	Z0p8	DUP	L_33pr	-0.00679393	0.00465262	-1.46024	0.144226	712023	712054	2689	23174	11378	4229
regional_specificity_threshold	Z0p8	DUP	L_a24pr	-0.0173012	0.00402558	-4.29782	1.7255e-05	712020	712051	2814	27431	11558	4466
regional_specificity_threshold	Z0p8	DUP	L_p32pr	-0.0239315	0.00399777	-5.98621	2.15063e-09	712011	712042	2754	26343	13094	4371
regional_specificity_threshold	Z0p8	DUP	L_a24	-0.0348905	0.00629782	-5.54009	3.02613e-08	712007	712039	2034	17826	10562	3243
regional_specificity_threshold	Z0p8	DUP	L_d32	-0.0119223	0.0068581	-1.73843	0.0821366	712023	712054	1854	15281	9757	2884
regional_specificity_threshold	Z0p8	DUP	L_8BM	-0.0526927	0.00735768	-7.16159	7.99568e-13	711989	712020	1550	12623	8102	2467
regional_specificity_threshold	Z0p8	DUP	L_p32	-0.0214697	0.00397483	-5.4014	6.61811e-08	712015	712046	3195	30611	14823	5039
regional_specificity_threshold	Z0p8	DUP	L_10r	-0.042805	0.00802032	-5.33707	9.45374e-08	712006	712038	1300	11142	7490	2074
regional_specificity_threshold	Z0p8	DUP	L_47m	-0.014766	0.00524341	-2.81611	0.00486131	712022	712054	2462	22662	13319	3883
regional_specificity_threshold	Z0p8	DUP	L_8Av	0.00841589	0.00821114	1.02494	0.305394	712018	712049	1363	12269	7774	2116
regional_specificity_threshold	Z0p8	DUP	L_8Ad	-0.0349983	0.00570116	-6.1388	8.32659e-10	712004	712035	1703	14865	8165	2662
regional_specificity_threshold	Z0p8	DUP	L_9m	-0.0471092	0.00570206	-8.26178	1.4418e-16	711980	712011	1315	12141	6808	2087
regional_specificity_threshold	Z0p8	DUP	L_8BL	-0.0157929	0.0116059	-1.36076	0.173589	712023	712054	526	5409	3784	828
regional_specificity_threshold	Z0p8	DUP	L_9p	-0.0158294	0.00461588	-3.42934	0.000605143	712021	712053	1898	19743	9280	2959
regional_specificity_threshold	Z0p8	DUP	L_10d	-0.0200135	0.00433982	-4.61158	3.99802e-06	712018	712049	2601	22767	11501	4126
regional_specificity_threshold	Z0p8	DUP	L_8C	-0.0207973	0.00772506	-2.69218	0.00709911	712021	712053	1492	14183	9575	2347
regional_specificity_threshold	Z0p8	DUP	L_44	-0.0414326	0.00584585	-7.08753	1.36873e-12	711994	712025	1349	11375	6198	2161
regional_specificity_threshold	Z0p8	DUP	L_45	-0.001094	0.00745297	-0.146787	0.8833	712022	712053	1580	17071	12282	2454
regional_specificity_threshold	Z0p8	DUP	L_47l	-0.0338867	0.00691874	-4.89781	9.69679e-07	712011	712042	2065	17411	10200	3257
regional_specificity_threshold	Z0p8	DUP	L_a47r	-0.00911773	0.0166459	-0.547747	0.583866	712023	712054	288	3527	3342	449
regional_specificity_threshold	Z0p8	DUP	L_6r	-0.00476895	0.00549927	-0.867195	0.385836	712022	712054	1916	21588	12911	2958
regional_specificity_threshold	Z0p8	DUP	L_IFJa	-0.0196347	0.00443055	-4.43166	9.35481e-06	712018	712050	2880	25807	13138	4591
regional_specificity_threshold	Z0p8	DUP	L_IFJp	-0.0189162	0.00519638	-3.64026	0.000272415	712020	712052	2523	23863	14067	3860
regional_specificity_threshold	Z0p8	DUP	L_IFSp	-0.0251085	0.00819806	-3.06274	0.00219344	712020	712051	1332	11165	6759	2173
regional_specificity_threshold	Z0p8	DUP	L_IFSa	-0.0309904	0.0038192	-8.11436	4.90477e-16	711992	712023	2713	23243	10492	4353
regional_specificity_threshold	Z0p8	DUP	L_p9.46v	-0.0255435	0.00274444	-9.30738	1.32004e-20	711988	712019	4003	37257	16277	6419
regional_specificity_threshold	Z0p8	DUP	L_46	-0.0421501	0.00476404	-8.84755	9.00097e-19	711976	712008	1908	15815	7568	3061
regional_specificity_threshold	Z0p8	DUP	L_a9.46v	-0.0264653	0.00653236	-4.05141	5.09248e-05	712017	712048	1441	15437	8859	2301
regional_specificity_threshold	Z0p8	DUP	L_9.46d	-0.0396566	0.00646348	-6.13549	8.50211e-10	712002	712033	1496	14958	8218	2435
regional_specificity_threshold	Z0p8	DUP	L_9a	-0.0146227	0.0121312	-1.20538	0.228058	712023	712054	622	5501	4569	1003
regional_specificity_threshold	Z0p8	DUP	L_10v	-0.0387186	0.00469687	-8.24349	1.68028e-16	711985	712016	1809	16345	8548	2890
regional_specificity_threshold	Z0p8	DUP	L_a10p	-0.026402	0.0047377	-5.57275	2.50999e-08	712011	712042	2641	24899	12793	4188
regional_specificity_threshold	Z0p8	DUP	L_10pp	-0.0278554	0.00686038	-4.06033	4.9017e-05	712016	712048	1253	13175	8155	1960
regional_specificity_threshold	Z0p8	DUP	L_11l	-0.00618193	0.011789	-0.524383	0.600013	712023	712054	634	6104	4824	1004
regional_specificity_threshold	Z0p8	DUP	L_13l	-0.0338824	0.00898391	-3.77145	0.000162338	712016	712047	1005	7117	4680	1644
regional_specificity_threshold	Z0p8	DUP	L_OFC	-0.0355477	0.00792913	-4.48318	7.35706e-06	712013	712044	1220	11758	8318	1911
regional_specificity_threshold	Z0p8	DUP	L_47s	-0.0171996	0.00867865	-1.98183	0.0474998	712022	712054	1266	11092	7972	2010
regional_specificity_threshold	Z0p8	DUP	L_LIPd	-0.0190705	0.00629727	-3.02838	0.00245895	712021	712052	1960	15099	8653	3180
regional_specificity_threshold	Z0p8	DUP	L_6a	-0.0333268	0.011623	-2.86731	0.00414007	712019	712050	747	5923	4708	1151
regional_specificity_threshold	Z0p8	DUP	L_i6.8	-0.0155987	0.00770303	-2.02501	0.0428677	712023	712054	1068	8380	4999	1685
regional_specificity_threshold	Z0p8	DUP	L_s6.8	-0.0347213	0.00621667	-5.58519	2.33678e-08	712007	712038	1450	13682	8325	2302
regional_specificity_threshold	Z0p8	DUP	L_43	-0.0446425	0.00692464	-6.4469	1.14361e-10	711998	712029	1208	12235	7888	1940
regional_specificity_threshold	Z0p8	DUP	L_OP4	-0.00805356	0.0112171	-0.717975	0.472774	712023	712054	602	4773	3701	971
regional_specificity_threshold	Z0p8	DUP	L_OP1	-0.0124282	0.0373311	-0.332918	0.739197	712023	712054	146	642	625	232
regional_specificity_threshold	Z0p8	DUP	L_OP2.3	-0.0273632	0.00506734	-5.3999	6.67351e-08	712011	712043	2437	22781	12400	3956
regional_specificity_threshold	Z0p8	DUP	L_52	-0.022855	0.00495626	-4.61133	4.00285e-06	712016	712048	2304	24258	11818	3610
regional_specificity_threshold	Z0p8	DUP	L_RI	-0.0216245	0.0051804	-4.17429	2.99012e-05	712018	712049	2609	25274	13680	4249
regional_specificity_threshold	Z0p8	DUP	L_PFcm	-0.0234728	0.00438721	-5.35028	8.78908e-08	712013	712045	2932	25994	13262	4786
regional_specificity_threshold	Z0p8	DUP	L_PoI2	-0.0256806	0.00662372	-3.87707	0.000105747	712017	712049	1657	14377	9032	2608
regional_specificity_threshold	Z0p8	DUP	L_TA2	-0.0179475	0.00911632	-1.96872	0.0489861	712022	712054	996	9096	5999	1606
regional_specificity_threshold	Z0p8	DUP	L_FOP4	-0.0297437	0.006313	-4.71149	2.46036e-06	712013	712045	2194	19039	12317	3469
regional_specificity_threshold	Z0p8	DUP	L_MI	-0.0357857	0.00733681	-4.87756	1.07473e-06	712011	712042	1590	13583	8858	2534
regional_specificity_threshold	Z0p8	DUP	L_Pir	-0.0089478	0.00476954	-1.87603	0.0606526	712023	712054	2606	23387	13446	4078
regional_specificity_threshold	Z0p8	DUP	L_AVI	-0.0354839	0.0079623	-4.45649	8.33465e-06	712013	712044	1369	14193	9695	2173
regional_specificity_threshold	Z0p8	DUP	L_AAIC	-0.01351	0.0126606	-1.06709	0.285931	712023	712054	560	6116	5554	876
regional_specificity_threshold	Z0p8	DUP	L_FOP1	-0.0392939	0.00561244	-7.00122	2.54353e-12	711995	712027	1758	15089	8349	2816
regional_specificity_threshold	Z0p8	DUP	L_FOP3	-0.0260029	0.00586668	-4.4323	9.32731e-06	712016	712047	2251	18717	11249	3601
regional_specificity_threshold	Z0p8	DUP	L_FOP2	-0.016553	0.0052007	-3.18284	0.00145854	712022	712053	2375	19816	10395	3819
regional_specificity_threshold	Z0p8	DUP	L_PFt	-0.0269199	0.0053921	-4.99248	5.9649e-07	712013	712044	2574	24362	13388	4092
regional_specificity_threshold	Z0p8	DUP	L_AIP	-0.0254849	0.00637015	-4.00068	6.31787e-05	712017	712049	1717	14648	7574	2794
regional_specificity_threshold	Z0p8	DUP	L_EC	-0.0109678	0.00530877	-2.06597	0.0388323	712023	712054	2690	22730	12685	4171
regional_specificity_threshold	Z0p8	DUP	L_PreS	-0.00814156	0.00477113	-1.70642	0.0879308	712023	712054	2610	24465	12218	4143
regional_specificity_threshold	Z0p8	DUP	L_H	-0.00874867	0.00534682	-1.63624	0.101791	712023	712054	2818	22647	12546	4449
regional_specificity_threshold	Z0p8	DUP	L_ProS	-0.00327304	0.00835059	-0.391953	0.695093	712022	712054	1068	10626	6986	1718
regional_specificity_threshold	Z0p8	DUP	L_PeEc	-0.01747	0.00590499	-2.95851	0.00309157	712021	712053	2076	19742	10734	3251
regional_specificity_threshold	Z0p8	DUP	L_STGa	-0.056594	0.00707713	-7.99675	1.28264e-15	711979	712011	1745	14867	9502	2828
regional_specificity_threshold	Z0p8	DUP	L_PBelt	-0.0171384	0.00861454	-1.98947	0.0466503	712022	712054	1134	10906	7565	1827
regional_specificity_threshold	Z0p8	DUP	L_A5	-0.00418256	0.0107936	-0.387504	0.698383	712023	712054	804	6757	4518	1270
regional_specificity_threshold	Z0p8	DUP	L_PHA1	-0.00124898	0.00454083	-0.275055	0.783274	712019	712051	2015	16267	8250	3190
regional_specificity_threshold	Z0p8	DUP	L_PHA3	-0.0245668	0.00676444	-3.63175	0.000281557	712018	712050	1560	15636	8295	2496
regional_specificity_threshold	Z0p8	DUP	L_STSda	-0.00162829	0.00941756	-0.172899	0.862731	712022	712054	683	8444	5817	1093
regional_specificity_threshold	Z0p8	DUP	L_STSdp	-0.0517279	0.00936508	-5.5235	3.3264e-08	712003	712035	952	9088	6759	1571
regional_specificity_threshold	Z0p8	DUP	L_STSvp	-0.0570783	0.00842638	-6.77376	1.25743e-11	711992	712023	1363	10561	7087	2203
regional_specificity_threshold	Z0p8	DUP	L_TGd	-0.0318909	0.00694296	-4.59327	4.36565e-06	712013	712044	1507	15132	9352	2377
regional_specificity_threshold	Z0p8	DUP	L_TE1a	-0.0400614	0.0130915	-3.06011	0.00221277	712018	712049	594	5646	4450	911
regional_specificity_threshold	Z0p8	DUP	L_TE1p	-0.157873	0.0237023	-6.66066	2.73146e-11	711984	712016	237	1637	1474	389
regional_specificity_threshold	Z0p8	DUP	L_TE2a	0.00163607	0.0116201	0.140796	0.888031	712022	712053	677	6233	4342	1025
regional_specificity_threshold	Z0p8	DUP	L_TF	-0.0302129	0.00590021	-5.12065	3.04706e-07	712011	712043	1125	12477	7222	1831
regional_specificity_threshold	Z0p8	DUP	L_TE2p	-0.0681909	0.014793	-4.60966	4.03513e-06	712008	712039	399	3560	3079	625
regional_specificity_threshold	Z0p8	DUP	L_PHT	-0.0369816	0.0148467	-2.49089	0.0127431	712020	712051	549	4551	3643	889
regional_specificity_threshold	Z0p8	DUP	L_PH	-0.00586403	0.0159751	-0.367073	0.713565	712023	712054	309	4274	3975	484
regional_specificity_threshold	Z0p8	DUP	L_TPOJ1	-0.0065094	0.0110152	-0.590948	0.554556	712023	712054	576	6736	4458	924
regional_specificity_threshold	Z0p8	DUP	L_TPOJ2	-0.0113686	0.0102421	-1.10999	0.267005	712023	712054	605	5099	3461	969
regional_specificity_threshold	Z0p8	DUP	L_TPOJ3	-0.024636	0.00688982	-3.5757	0.000349351	712019	712050	1419	15611	9518	2290
regional_specificity_threshold	Z0p8	DUP	L_DVT	-0.0204459	0.0061561	-3.32125	0.000896292	712020	712052	1924	16543	8854	3124
regional_specificity_threshold	Z0p8	DUP	L_PGp	-0.0241829	0.00830418	-2.91213	0.00359004	712020	712052	950	10093	6175	1515
regional_specificity_threshold	Z0p8	DUP	L_IP2	-0.0364103	0.00735149	-4.95278	7.32082e-07	712010	712041	1287	11069	6511	2022
regional_specificity_threshold	Z0p8	DUP	L_IP1	-0.0281591	0.00568229	-4.9556	7.21544e-07	712013	712044	1925	16625	9111	3127
regional_specificity_threshold	Z0p8	DUP	L_IP0	-0.0191968	0.0049314	-3.89277	9.9131e-05	712020	712051	2630	23710	12471	4280
regional_specificity_threshold	Z0p8	DUP	L_PFop	0.00672663	0.00694994	0.967869	0.333111	712017	712049	1138	12937	7761	1791
regional_specificity_threshold	Z0p8	DUP	L_PF	0.00702688	0.0129237	0.543722	0.586633	712021	712053	435	4139	3495	724
regional_specificity_threshold	Z0p8	DUP	L_PFm	-0.0450066	0.0127777	-3.52229	0.000427906	712016	712047	491	5261	3759	805
regional_specificity_threshold	Z0p8	DUP	L_PGi	-0.0371971	0.00619566	-6.00374	1.93083e-09	712004	712035	2037	19338	11900	3207
regional_specificity_threshold	Z0p8	DUP	L_PGs	-0.0300474	0.0123685	-2.42934	0.0151268	712020	712052	665	5541	4295	1087
regional_specificity_threshold	Z0p8	DUP	L_V6A	-0.0250081	0.00512073	-4.8837	1.04177e-06	712014	712046	2892	24098	12659	4655
regional_specificity_threshold	Z0p8	DUP	L_VMV1	-0.0165751	0.00448112	-3.69887	0.000216609	712021	712052	2147	19344	8947	3487
regional_specificity_threshold	Z0p8	DUP	L_VMV3	-0.00374967	0.00801965	-0.46756	0.6401	712022	712054	1131	10028	7144	1864
regional_specificity_threshold	Z0p8	DUP	L_PHA2	-0.0113475	0.00581136	-1.95265	0.0508622	712023	712054	2268	21314	12256	3631
regional_specificity_threshold	Z0p8	DUP	L_V4t	-0.0163791	0.00424352	-3.8598	0.00011351	712021	712052	3466	30897	14380	5457
regional_specificity_threshold	Z0p8	DUP	L_FST	-0.0432705	0.0117955	-3.66841	0.000244115	712015	712047	751	6448	5098	1213
regional_specificity_threshold	Z0p8	DUP	L_V3CD	-0.024161	0.0111797	-2.16116	0.0306838	712022	712053	784	6719	5417	1292
regional_specificity_threshold	Z0p8	DUP	L_LO3	-0.011886	0.00533144	-2.22942	0.0257869	712023	712054	2337	18198	11026	3739
regional_specificity_threshold	Z0p8	DUP	L_VMV2	-0.0152656	0.0079413	-1.92231	0.0545684	712023	712054	1242	12386	7826	2007
regional_specificity_threshold	Z0p8	DUP	L_31pd	-0.0123675	0.0068487	-1.80582	0.0709482	712023	712054	1074	11941	7309	1659
regional_specificity_threshold	Z0p8	DUP	L_31a	-0.0101401	0.00927982	-1.09271	0.274523	712023	712054	945	7672	4919	1505
regional_specificity_threshold	Z0p8	DUP	L_VVC	-0.0114662	0.00461893	-2.48244	0.0130491	712023	712054	2013	15945	8000	3198
regional_specificity_threshold	Z0p8	DUP	L_25	-0.0300039	0.00679911	-4.41291	1.0203e-05	712014	712046	1778	16037	9135	2795
regional_specificity_threshold	Z0p8	DUP	L_s32	-0.0301887	0.0040498	-7.45436	9.05864e-14	711997	712029	2967	25945	12168	4750
regional_specificity_threshold	Z0p8	DUP	L_pOFC	-0.024537	0.00527732	-4.64953	3.32865e-06	712015	712047	2508	20602	11254	3906
regional_specificity_threshold	Z0p8	DUP	L_PoI1	-0.0214919	0.00537466	-3.99874	6.3698e-05	712018	712050	2241	19910	11271	3511
regional_specificity_threshold	Z0p8	DUP	L_Ig	-0.0219136	0.00686592	-3.19165	0.00141478	712020	712051	1545	13670	8136	2508
regional_specificity_threshold	Z0p8	DUP	L_FOP5	-0.00366473	0.00544947	-0.672493	0.501271	712022	712053	2369	20989	11451	3692
regional_specificity_threshold	Z0p8	DUP	L_p10p	-0.019453	0.00468596	-4.15134	3.30636e-05	712019	712050	1855	16988	8729	2931
regional_specificity_threshold	Z0p8	DUP	L_p47r	-0.0196979	0.00663555	-2.96854	0.00299245	712021	712052	1489	13809	7626	2305
regional_specificity_threshold	Z0p8	DUP	L_TGv	-0.0419833	0.00607083	-6.91558	4.67014e-12	711995	712026	1585	17011	9607	2556
regional_specificity_threshold	Z0p8	DUP	L_MBelt	-0.00601183	0.00955864	-0.628941	0.529388	712023	712054	947	9960	7094	1513
regional_specificity_threshold	Z0p8	DUP	L_LBelt	-0.00458749	0.00462324	-0.992267	0.321068	712022	712053	2987	25222	13881	4678
regional_specificity_threshold	Z0p8	DUP	L_A4	-0.0174107	0.0122283	-1.4238	0.154504	712023	712054	640	6019	4431	1036
regional_specificity_threshold	Z0p8	DUP	L_STSva	-0.0106373	0.00634342	-1.6769	0.0935627	712023	712054	1915	16393	9850	3019
regional_specificity_threshold	Z0p8	DUP	L_TE1m	-0.0716914	0.0115521	-6.20593	5.44574e-10	711995	712026	692	6526	4667	1083
regional_specificity_threshold	Z0p8	DUP	L_PI	-0.0180393	0.0059122	-3.0512	0.00227954	712021	712053	1755	16922	9958	2762
regional_specificity_threshold	Z0p8	DUP	L_a32pr	-0.0172051	0.00385805	-4.45954	8.21701e-06	712020	712051	2597	24640	12634	4003
regional_specificity_threshold	Z0p8	DUP	L_p24	-0.0253197	0.0052262	-4.84476	1.26837e-06	712014	712046	2177	20865	10453	3402
regional_specificity_threshold	Z1p0	DEL	L_V1	-0.0845939	0.00952471	-8.88151	6.63662e-19	711968	711999	956	7220	5256	3021
regional_specificity_threshold	Z1p0	DEL	L_MST	-0.141579	0.0434223	-3.26051	0.00111226	712005	712037	102	428	379	313
regional_specificity_threshold	Z1p0	DEL	L_V6	-0.0924852	0.0109113	-8.4761	2.3407e-17	711970	712001	940	5176	3561	2971
regional_specificity_threshold	Z1p0	DEL	L_V2	-0.0880482	0.0101861	-8.64393	5.46153e-18	711969	712001	765	6442	4795	2451
regional_specificity_threshold	Z1p0	DEL	L_V3	-0.0403541	0.0151295	-2.66725	0.00764796	712011	712043	479	3758	3323	1547
regional_specificity_threshold	Z1p0	DEL	L_V4	-0.131012	0.0174722	-7.49832	6.48474e-14	711973	712005	493	2858	2331	1555
regional_specificity_threshold	Z1p0	DEL	L_V8	-0.0563476	0.013159	-4.28206	1.85237e-05	712006	712037	888	4039	2905	2909
regional_specificity_threshold	Z1p0	DEL	L_4	-0.046292	0.021019	-2.20239	0.0276387	712012	712043	431	1631	1190	1361
regional_specificity_threshold	Z1p0	DEL	L_3b	-0.141971	0.0182681	-7.77155	7.78116e-15	711969	712001	435	2687	2245	1425
regional_specificity_threshold	Z1p0	DEL	L_FEF	-0.00140712	0.0155603	-0.0904302	0.927945	712011	712043	457	2803	2256	1380
regional_specificity_threshold	Z1p0	DEL	L_PEF	-0.074287	0.00815931	-9.10457	8.71978e-20	711969	712001	1547	8130	4578	4942
regional_specificity_threshold	Z1p0	DEL	L_55b	-0.106453	0.011576	-9.19594	3.74367e-20	711958	711989	904	5277	3771	2715
regional_specificity_threshold	Z1p0	DEL	L_V3A	-0.0358	0.012434	-2.87921	0.00398705	712012	712043	644	4686	3694	2122
regional_specificity_threshold	Z1p0	DEL	L_RSC	0.0190431	0.0174701	1.09004	0.275695	712008	712039	442	2182	1603	1260
regional_specificity_threshold	Z1p0	DEL	L_POS2	-0.0474435	0.0203929	-2.32647	0.0199941	712011	712043	358	1820	1567	1046
regional_specificity_threshold	Z1p0	DEL	L_V7	-0.0238654	0.0074702	-3.19475	0.00139967	712013	712044	1397	11304	7738	4194
regional_specificity_threshold	Z1p0	DEL	L_IPS1	-0.0811282	0.00856091	-9.47658	2.64851e-21	711963	711994	1078	8512	5875	3503
regional_specificity_threshold	Z1p0	DEL	L_FFC	-0.0695462	0.015171	-4.58415	4.56057e-06	712003	712034	578	2567	1709	1845
regional_specificity_threshold	Z1p0	DEL	L_V3B	-0.0533433	0.00785782	-6.78856	1.13503e-11	711996	712027	1573	9664	6251	4615
regional_specificity_threshold	Z1p0	DEL	L_LO1	-0.0664644	0.00686388	-9.68322	3.58456e-22	711967	711999	1502	9446	5425	4757
regional_specificity_threshold	Z1p0	DEL	L_LO2	-0.0822718	0.0106309	-7.73897	1.00588e-14	711980	712011	1152	7193	5633	3475
regional_specificity_threshold	Z1p0	DEL	L_PIT	-0.0296456	0.00834016	-3.55457	0.00037867	712012	712043	1188	8592	6537	3723
regional_specificity_threshold	Z1p0	DEL	L_MT	-0.0364647	0.00712013	-5.12135	3.03576e-07	712008	712040	1411	11803	8050	4331
regional_specificity_threshold	Z1p0	DEL	L_A1	-0.0831791	0.0138743	-5.9952	2.03507e-09	711993	712024	881	4268	3253	2610
regional_specificity_threshold	Z1p0	DEL	L_PSL	-0.0505943	0.0311153	-1.62602	0.103946	712012	712043	140	699	533	461
regional_specificity_threshold	Z1p0	DEL	L_SFL	-0.0146952	0.0319516	-0.459919	0.645575	712013	712044	244	806	715	792
regional_specificity_threshold	Z1p0	DEL	L_PCV	-0.0846617	0.0376658	-2.24771	0.0245955	712010	712042	139	637	544	490
regional_specificity_threshold	Z1p0	DEL	L_STV	-0.00494692	0.0334642	-0.147827	0.882479	712013	712044	95	760	668	317
regional_specificity_threshold	Z1p0	DEL	L_7Pm	-0.0979709	0.0177263	-5.52687	3.26301e-08	711994	712026	433	2574	2093	1376
regional_specificity_threshold	Z1p0	DEL	L_7m	-0.0719537	0.0319465	-2.25232	0.0243032	712010	712042	188	716	589	595
regional_specificity_threshold	Z1p0	DEL	L_POS1	-0.0630268	0.0371933	-1.69458	0.0901573	712012	712043	127	578	511	454
regional_specificity_threshold	Z1p0	DEL	L_23d	-0.0856119	0.00700783	-12.2166	2.59019e-34	711924	711956	1047	8925	4969	3277
regional_specificity_threshold	Z1p0	DEL	L_v23ab	-0.076805	0.0129031	-5.95242	2.6454e-09	711994	712026	744	3554	2488	2245
regional_specificity_threshold	Z1p0	DEL	L_d23ab	-0.0325724	0.014911	-2.18445	0.0289302	712012	712044	679	3145	2313	2180
regional_specificity_threshold	Z1p0	DEL	L_31pv	-0.0788744	0.019613	-4.02153	5.78377e-05	712004	712036	346	1738	1303	1130
regional_specificity_threshold	Z1p0	DEL	L_5m	-0.15317	0.0184873	-8.28513	1.18531e-16	711962	711993	423	2659	2338	1307
regional_specificity_threshold	Z1p0	DEL	L_5mv	-0.0456576	0.0114516	-3.98699	6.69355e-05	712008	712040	758	6804	5806	2296
regional_specificity_threshold	Z1p0	DEL	L_23c	-0.0368598	0.0242567	-1.51957	0.12862	712013	712044	210	1193	961	656
regional_specificity_threshold	Z1p0	DEL	L_5L	-0.120031	0.0157986	-7.59755	3.02796e-14	711974	712005	538	3270	2602	1646
regional_specificity_threshold	Z1p0	DEL	L_24dd	-0.111085	0.0235125	-4.72449	2.30818e-06	711998	712030	389	1488	1289	1182
regional_specificity_threshold	Z1p0	DEL	L_24dv	-0.0452416	0.0250308	-1.80744	0.0706955	712012	712043	280	1142	998	887
regional_specificity_threshold	Z1p0	DEL	L_7AL	-0.077353	0.0165687	-4.66861	3.03399e-06	712002	712033	186	3615	3568	529
regional_specificity_threshold	Z1p0	DEL	L_SCEF	-0.124999	0.0208812	-5.98617	2.15122e-09	711988	712020	356	2294	2152	1091
regional_specificity_threshold	Z1p0	DEL	L_6ma	-0.0892314	0.0151233	-5.90025	3.63391e-09	711993	712024	613	3786	3045	1788
regional_specificity_threshold	Z1p0	DEL	L_7Am	-0.0836682	0.0202922	-4.12317	3.73812e-05	712004	712035	327	2127	2000	973
regional_specificity_threshold	Z1p0	DEL	L_7PL	-0.0587129	0.010139	-5.79078	7.01421e-09	711999	712031	723	6482	4838	2040
regional_specificity_threshold	Z1p0	DEL	L_7PC	-0.080314	0.0222849	-3.60396	0.000313467	712006	712037	293	1462	1091	1013
regional_specificity_threshold	Z1p0	DEL	L_LIPv	-0.121403	0.0122696	-9.8946	4.43538e-23	711946	711977	502	4503	3215	1525
regional_specificity_threshold	Z1p0	DEL	L_VIP	-0.0959841	0.0156575	-6.13022	8.78825e-10	711990	712022	499	2615	1888	1537
regional_specificity_threshold	Z1p0	DEL	L_MIP	-0.0143848	0.0104241	-1.37996	0.167601	712012	712044	854	7674	6379	2727
regional_specificity_threshold	Z1p0	DEL	L_1	-0.155282	0.0160438	-9.67859	3.75045e-22	711943	711974	457	3062	2354	1460
regional_specificity_threshold	Z1p0	DEL	L_2	-0.193448	0.0184259	-10.4987	8.86312e-26	711925	711957	258	2397	2039	816
regional_specificity_threshold	Z1p0	DEL	L_3a	-0.0830337	0.0123816	-6.7062	2.00166e-11	711988	712019	885	4601	3344	2795
regional_specificity_threshold	Z1p0	DEL	L_6d	-0.158678	0.0174686	-9.08359	1.05767e-19	711951	711982	462	2848	2367	1505
regional_specificity_threshold	Z1p0	DEL	L_6mp	-0.0843472	0.0181332	-4.65152	3.29652e-06	712001	712032	495	2326	1752	1630
regional_specificity_threshold	Z1p0	DEL	L_6v	-0.13262	0.0176918	-7.49613	6.59399e-14	711973	712005	500	2921	2410	1590
regional_specificity_threshold	Z1p0	DEL	L_p24pr	-0.0321785	0.00919465	-3.4997	0.000465866	712012	712043	1183	8401	6683	3487
regional_specificity_threshold	Z1p0	DEL	L_33pr	-0.0217439	0.010207	-2.13029	0.0331487	712013	712044	1208	5902	4148	3706
regional_specificity_threshold	Z1p0	DEL	L_a24pr	-0.0212127	0.0091988	-2.30602	0.02111	712013	712044	1162	5967	3774	3827
regional_specificity_threshold	Z1p0	DEL	L_p32pr	-0.0588944	0.00945409	-6.22951	4.6861e-10	711997	712028	1081	6456	4467	3457
regional_specificity_threshold	Z1p0	DEL	L_a24	-0.0402425	0.0123155	-3.26764	0.00108464	712011	712042	778	4218	3195	2525
regional_specificity_threshold	Z1p0	DEL	L_d32	-0.0188828	0.0155602	-1.21354	0.224926	712013	712044	632	2770	2204	1919
regional_specificity_threshold	Z1p0	DEL	L_8BM	-0.0342474	0.0163021	-2.1008	0.0356598	712012	712044	509	3122	2608	1571
regional_specificity_threshold	Z1p0	DEL	L_p32	-0.0289152	0.00749417	-3.85835	0.000114181	712012	712043	1398	8892	6016	4434
regional_specificity_threshold	Z1p0	DEL	L_10r	-0.0103384	0.0172874	-0.598029	0.549821	712013	712044	402	2405	2017	1248
regional_specificity_threshold	Z1p0	DEL	L_47m	-0.0886334	0.0110487	-8.02206	1.04413e-15	711975	712007	1005	5429	3503	3157
regional_specificity_threshold	Z1p0	DEL	L_8Av	-0.122913	0.0180798	-6.79835	1.06051e-11	711981	712013	446	2853	2550	1445
regional_specificity_threshold	Z1p0	DEL	L_8Ad	-0.100892	0.0150343	-6.71077	1.93993e-11	711985	712016	565	3209	2452	1750
regional_specificity_threshold	Z1p0	DEL	L_9m	-0.0208839	0.0180134	-1.15935	0.246313	712013	712044	389	2147	1636	1127
regional_specificity_threshold	Z1p0	DEL	L_8BL	-0.0530315	0.0349772	-1.51617	0.129477	712012	712044	122	703	643	395
regional_specificity_threshold	Z1p0	DEL	L_9p	-0.0466749	0.0122996	-3.79483	0.000147776	712009	712040	711	3304	2025	2187
regional_specificity_threshold	Z1p0	DEL	L_10d	-0.0627229	0.0106408	-5.89456	3.76134e-09	711998	712029	993	5187	3404	3034
regional_specificity_threshold	Z1p0	DEL	L_8C	-0.0241589	0.0190521	-1.26805	0.204783	712013	712044	496	2352	2015	1539
regional_specificity_threshold	Z1p0	DEL	L_44	-0.0588753	0.0146512	-4.01846	5.85961e-05	712006	712038	434	2763	2024	1388
regional_specificity_threshold	Z1p0	DEL	L_45	-0.0509749	0.0189361	-2.69194	0.00710425	712011	712042	521	2516	2228	1561
regional_specificity_threshold	Z1p0	DEL	L_47l	-0.0156296	0.0134242	-1.16429	0.244309	712013	712044	786	4406	3546	2384
regional_specificity_threshold	Z1p0	DEL	L_a47r	-0.0406844	0.0645374	-0.6304	0.528433	712013	712044	52	219	216	160
regional_specificity_threshold	Z1p0	DEL	L_6r	-0.0639603	0.0134737	-4.74706	2.06508e-06	712003	712034	669	4642	4061	2058
regional_specificity_threshold	Z1p0	DEL	L_IFJa	-0.0664734	0.0100975	-6.58315	4.6145e-11	711993	712024	1189	6212	4392	3752
regional_specificity_threshold	Z1p0	DEL	L_IFJp	-0.0476011	0.0107541	-4.42633	9.58894e-06	712007	712038	1038	6370	5136	3095
regional_specificity_threshold	Z1p0	DEL	L_IFSp	-0.0981375	0.0232797	-4.21558	2.49217e-05	712002	712034	357	1460	1150	1269
regional_specificity_threshold	Z1p0	DEL	L_IFSa	-0.0418851	0.00828855	-5.05337	4.34376e-07	712007	712038	1012	5453	3257	3244
regional_specificity_threshold	Z1p0	DEL	L_p9.46v	-0.0571917	0.0056293	-10.1596	3.03337e-24	711969	712000	1883	11157	6040	5996
regional_specificity_threshold	Z1p0	DEL	L_46	-0.0547696	0.0142356	-3.84737	0.000119422	712007	712039	599	2910	1979	2012
regional_specificity_threshold	Z1p0	DEL	L_a9.46v	-0.0435307	0.0176946	-2.46011	0.0138901	712011	712043	487	1966	1368	1514
regional_specificity_threshold	Z1p0	DEL	L_9.46d	-0.0268627	0.0204665	-1.31252	0.189346	712013	712044	449	1652	1203	1443
regional_specificity_threshold	Z1p0	DEL	L_9a	-0.057211	0.0369881	-1.54674	0.121927	712012	712043	165	629	589	497
regional_specificity_threshold	Z1p0	DEL	L_10v	-0.0348245	0.0119677	-2.90987	0.00361612	712012	712043	605	2797	1795	1964
regional_specificity_threshold	Z1p0	DEL	L_a10p	-0.0545195	0.00960427	-5.67659	1.37556e-08	712001	712032	1014	7561	5563	3148
regional_specificity_threshold	Z1p0	DEL	L_10pp	-0.0096946	0.0154435	-0.627746	0.530171	712012	712044	382	3121	2596	1117
regional_specificity_threshold	Z1p0	DEL	L_11l	-0.00103245	0.047406	-0.0217788	0.982624	712013	712044	139	402	378	388
regional_specificity_threshold	Z1p0	DEL	L_13l	0.0202088	0.0279029	0.724252	0.468911	712011	712042	292	992	817	951
regional_specificity_threshold	Z1p0	DEL	L_OFC	-0.0108134	0.0157877	-0.684925	0.493392	712013	712044	374	3186	2761	1148
regional_specificity_threshold	Z1p0	DEL	L_47s	-0.00976853	0.0158421	-0.61662	0.537486	712012	712044	425	3326	2931	1362
regional_specificity_threshold	Z1p0	DEL	L_LIPd	-0.0571523	0.0122239	-4.67544	2.93472e-06	712004	712036	795	4470	3417	2412
regional_specificity_threshold	Z1p0	DEL	L_6a	-0.126339	0.0234158	-5.39545	6.84106e-08	711993	712024	194	1686	1549	584
regional_specificity_threshold	Z1p0	DEL	L_i6.8	-0.0565812	0.0244751	-2.31178	0.0207904	712011	712042	301	1249	994	965
regional_specificity_threshold	Z1p0	DEL	L_s6.8	-0.0800875	0.0207712	-3.8557	0.000115426	712005	712036	457	1805	1387	1454
regional_specificity_threshold	Z1p0	DEL	L_43	-0.0705771	0.01449	-4.87075	1.11243e-06	712001	712033	356	2451	1589	1152
regional_specificity_threshold	Z1p0	DEL	L_OP4	-0.148196	0.0360556	-4.11021	3.95424e-05	712001	712032	143	529	436	395
regional_specificity_threshold	Z1p0	DEL	L_OP1	-0.121597	0.140399	-0.86608	0.386447	712012	712044	14	47	47	47
regional_specificity_threshold	Z1p0	DEL	L_OP2.3	-0.0352312	0.00886056	-3.97619	7.00487e-05	712011	712042	940	7232	4417	2987
regional_specificity_threshold	Z1p0	DEL	L_52	-0.0618181	0.00789786	-7.8272	5.00736e-15	711986	712017	987	9829	6139	3093
regional_specificity_threshold	Z1p0	DEL	L_RI	-0.0590182	0.00875477	-6.74126	1.57342e-11	711994	712025	1148	9115	7172	3545
regional_specificity_threshold	Z1p0	DEL	L_PFcm	-0.0565523	0.00914376	-6.1848	6.22756e-10	711998	712029	1303	7790	5650	4084
regional_specificity_threshold	Z1p0	DEL	L_PoI2	-0.0126435	0.0102426	-1.23441	0.217051	712012	712044	624	5134	3141	1913
regional_specificity_threshold	Z1p0	DEL	L_TA2	0.0158944	0.0192105	0.827379	0.408023	712009	712041	292	2552	2398	952
regional_specificity_threshold	Z1p0	DEL	L_FOP4	-0.0145081	0.0127047	-1.14195	0.253477	712013	712044	839	4875	4032	2572
regional_specificity_threshold	Z1p0	DEL	L_MI	-0.0135418	0.0160232	-0.845137	0.398035	712013	712044	545	3398	2935	1648
regional_specificity_threshold	Z1p0	DEL	L_Pir	-0.0387186	0.00909388	-4.25765	2.06661e-05	712009	712041	1243	9253	7414	3660
regional_specificity_threshold	Z1p0	DEL	L_AVI	0.00519699	0.0170753	0.304356	0.760857	712010	712042	438	3135	2701	1311
regional_specificity_threshold	Z1p0	DEL	L_AAIC	0.0202321	0.0244849	0.826307	0.408631	712010	712041	102	1559	1550	355
regional_specificity_threshold	Z1p0	DEL	L_FOP1	-0.0124652	0.0136245	-0.91491	0.36024	712013	712044	575	3916	3179	1764
regional_specificity_threshold	Z1p0	DEL	L_FOP3	-0.0440644	0.010932	-4.03076	5.56123e-05	712009	712040	978	6642	5399	2955
regional_specificity_threshold	Z1p0	DEL	L_FOP2	-0.0342694	0.0106235	-3.22581	0.00125631	712012	712043	944	5207	3590	3118
regional_specificity_threshold	Z1p0	DEL	L_PFt	-0.0919683	0.0113483	-8.10414	5.33478e-16	711974	712005	1137	5910	4333	3437
regional_specificity_threshold	Z1p0	DEL	L_AIP	-0.0674706	0.0145247	-4.64523	3.39862e-06	712003	712034	597	3393	2579	1949
regional_specificity_threshold	Z1p0	DEL	L_EC	-0.0707717	0.0102672	-6.893	5.47542e-12	711989	712021	1213	5943	4016	3550
regional_specificity_threshold	Z1p0	DEL	L_PreS	-0.00409116	0.00868126	-0.471264	0.637453	712009	712040	1244	9593	7671	3588
regional_specificity_threshold	Z1p0	DEL	L_H	-0.0297483	0.011	-2.70439	0.00684349	712012	712044	1312	4788	3068	3944
regional_specificity_threshold	Z1p0	DEL	L_ProS	-0.115904	0.0206613	-5.60974	2.02833e-08	711992	712023	300	2121	1946	985
regional_specificity_threshold	Z1p0	DEL	L_PeEc	-0.0184622	0.00900762	-2.04962	0.0404022	712013	712044	830	7026	4641	2616
regional_specificity_threshold	Z1p0	DEL	L_STGa	-0.0351344	0.0122799	-2.86112	0.00422175	712012	712043	637	4574	3602	2074
regional_specificity_threshold	Z1p0	DEL	L_PBelt	-0.0553083	0.0237557	-2.32821	0.0199017	712011	712042	354	1545	1287	1111
regional_specificity_threshold	Z1p0	DEL	L_A5	-0.0202512	0.0336553	-0.601724	0.547358	712013	712044	195	775	724	578
regional_specificity_threshold	Z1p0	DEL	L_PHA1	0.00416928	0.0107682	0.387184	0.698621	712007	712038	929	5182	3972	2610
regional_specificity_threshold	Z1p0	DEL	L_PHA3	0.0114045	0.0138917	0.82096	0.41167	712007	712039	550	3969	3199	1675
regional_specificity_threshold	Z1p0	DEL	L_STSda	-0.0807566	0.0369846	-2.18352	0.0289985	712010	712042	152	611	534	515
regional_specificity_threshold	Z1p0	DEL	L_STSdp	0.00241509	0.0234509	0.102985	0.917975	712012	712043	272	1452	1163	896
regional_specificity_threshold	Z1p0	DEL	L_STSvp	-0.0652909	0.0215737	-3.02641	0.00247501	712009	712040	423	1686	1340	1418
regional_specificity_threshold	Z1p0	DEL	L_TGd	-0.0241203	0.0147853	-1.63137	0.102814	712013	712044	491	3602	2992	1645
regional_specificity_threshold	Z1p0	DEL	L_TE1a	-0.0472931	0.0510168	-0.927009	0.353923	712013	712044	118	338	321	415
regional_specificity_threshold	Z1p0	DEL	L_TE1p	-0.0506446	0.0722385	-0.701075	0.483257	712013	712044	45	192	190	124
regional_specificity_threshold	Z1p0	DEL	L_TE2a	0.0151683	0.0385027	0.393954	0.693616	712012	712043	146	567	532	474
regional_specificity_threshold	Z1p0	DEL	L_TF	-0.0100906	0.0170071	-0.593316	0.55297	712013	712044	336	2639	2270	1135
regional_specificity_threshold	Z1p0	DEL	L_TE2p	-0.0817293	0.0428727	-1.90632	0.0566093	712011	712042	87	464	434	272
regional_specificity_threshold	Z1p0	DEL	L_PHT	-0.0109385	0.0345957	-0.316181	0.751866	712013	712044	131	630	496	411
regional_specificity_threshold	Z1p0	DEL	L_PH	-0.140144	0.0541042	-2.59026	0.00959102	712008	712040	53	345	340	171
regional_specificity_threshold	Z1p0	DEL	L_TPOJ1	-0.0727031	0.0443987	-1.63751	0.101526	712012	712043	116	363	311	379
regional_specificity_threshold	Z1p0	DEL	L_TPOJ2	-0.0122337	0.0280162	-0.436666	0.662354	712013	712044	137	644	442	461
regional_specificity_threshold	Z1p0	DEL	L_TPOJ3	-0.0272896	0.0127132	-2.14655	0.0318298	712013	712044	460	4574	3882	1507
regional_specificity_threshold	Z1p0	DEL	L_DVT	-0.0706443	0.0119099	-5.93155	3.00469e-09	711996	712027	760	4469	3228	2448
regional_specificity_threshold	Z1p0	DEL	L_PGp	-0.117655	0.0197111	-5.96899	2.39034e-09	711989	712020	199	2352	2131	694
regional_specificity_threshold	Z1p0	DEL	L_IP2	-0.132039	0.0187168	-7.05456	1.73583e-12	711978	712009	359	2319	1970	1193
regional_specificity_threshold	Z1p0	DEL	L_IP1	-0.104824	0.0126027	-8.31755	9.0228e-17	711969	712000	688	4153	3040	2198
regional_specificity_threshold	Z1p0	DEL	L_IP0	-0.0604484	0.00875536	-6.90416	5.06183e-12	711993	712024	1033	7964	5279	3332
regional_specificity_threshold	Z1p0	DEL	L_PFop	-0.103227	0.012454	-8.2887	1.1503e-16	711969	712001	392	4250	3024	1259
regional_specificity_threshold	Z1p0	DEL	L_PF	-0.190723	0.0210828	-9.04641	1.48734e-19	711948	711980	75	1529	1300	232
regional_specificity_threshold	Z1p0	DEL	L_PFm	-0.0550326	0.0262999	-2.09251	0.0363942	712011	712043	130	836	600	405
regional_specificity_threshold	Z1p0	DEL	L_PGi	-0.0760778	0.0118988	-6.39373	1.6216e-10	711992	712023	790	5341	4359	2439
regional_specificity_threshold	Z1p0	DEL	L_PGs	-0.179372	0.026524	-6.76264	1.35785e-11	711977	712009	163	1404	1379	489
regional_specificity_threshold	Z1p0	DEL	L_V6A	-0.0212561	0.00800559	-2.65515	0.00792777	712013	712044	1387	9053	6544	4216
regional_specificity_threshold	Z1p0	DEL	L_VMV1	-0.0307581	0.00974361	-3.15675	0.00159556	712012	712043	902	5996	4397	2786
regional_specificity_threshold	Z1p0	DEL	L_VMV3	-0.0992718	0.019416	-5.11289	3.17486e-07	711997	712028	418	2244	1973	1327
regional_specificity_threshold	Z1p0	DEL	L_PHA2	-0.0235209	0.00880001	-2.67283	0.00752199	712013	712044	957	7471	4922	2949
regional_specificity_threshold	Z1p0	DEL	L_V4t	-0.0358102	0.00767759	-4.66424	3.09913e-06	712009	712041	1561	11052	8116	4910
regional_specificity_threshold	Z1p0	DEL	L_FST	-0.00564443	0.0178995	-0.315341	0.752503	712012	712044	253	2800	2653	753
regional_specificity_threshold	Z1p0	DEL	L_V3CD	-0.260672	0.0275439	-9.46389	2.99055e-21	711937	711969	150	1242	1213	508
regional_specificity_threshold	Z1p0	DEL	L_LO3	-0.0426331	0.0108689	-3.92247	8.76693e-05	712009	712041	1012	6237	5027	2917
regional_specificity_threshold	Z1p0	DEL	L_VMV2	-0.0840104	0.0148135	-5.67121	1.41942e-08	711995	712026	393	4097	3679	1354
regional_specificity_threshold	Z1p0	DEL	L_31pd	-0.1244	0.0189736	-6.5565	5.519e-11	711983	712015	363	2607	2319	1068
regional_specificity_threshold	Z1p0	DEL	L_31a	-0.00312402	0.0150882	-0.20705	0.835971	712011	712043	337	2761	2290	1072
regional_specificity_threshold	Z1p0	DEL	L_VVC	-0.0203349	0.0122924	-1.65426	0.0980757	712013	712044	851	3393	2163	2491
regional_specificity_threshold	Z1p0	DEL	L_25	-0.0103051	0.0139023	-0.741251	0.458542	712012	712044	706	3593	2722	2213
regional_specificity_threshold	Z1p0	DEL	L_s32	-0.0349331	0.00843757	-4.14018	3.47148e-05	712010	712042	1199	7061	4557	3904
regional_specificity_threshold	Z1p0	DEL	L_pOFC	-0.0327309	0.0102764	-3.18506	0.00144742	712012	712043	1013	5554	3742	3153
regional_specificity_threshold	Z1p0	DEL	L_PoI1	-0.0181159	0.00842411	-2.15048	0.0315181	712013	712044	970	7552	4827	2801
regional_specificity_threshold	Z1p0	DEL	L_Ig	-0.0191278	0.0105895	-1.80629	0.0708743	712013	712044	527	5102	3329	1739
regional_specificity_threshold	Z1p0	DEL	L_FOP5	-0.0530036	0.0110628	-4.79114	1.65925e-06	712005	712036	946	5796	4505	2886
regional_specificity_threshold	Z1p0	DEL	L_p10p	-0.0277905	0.0127888	-2.17303	0.0297788	712013	712044	711	4746	3884	2145
regional_specificity_threshold	Z1p0	DEL	L_p47r	-0.0185642	0.0149962	-1.23793	0.215744	712013	712044	488	2868	2238	1442
regional_specificity_threshold	Z1p0	DEL	L_TGv	-0.0131661	0.0145769	-0.903223	0.366408	712013	712044	533	3890	3202	1758
regional_specificity_threshold	Z1p0	DEL	L_MBelt	-0.0100188	0.0189808	-0.527838	0.597612	712013	712044	253	2423	2261	778
regional_specificity_threshold	Z1p0	DEL	L_LBelt	-0.0579683	0.00934096	-6.20582	5.44951e-10	711997	712029	1385	6867	4983	4092
regional_specificity_threshold	Z1p0	DEL	L_A4	-0.0105977	0.033355	-0.317725	0.750694	712013	712044	160	804	723	505
regional_specificity_threshold	Z1p0	DEL	L_STSva	-0.0155651	0.01465	-1.06246	0.288027	712013	712044	705	3253	2491	2159
regional_specificity_threshold	Z1p0	DEL	L_TE1m	-0.0130095	0.033892	-0.383853	0.701088	712013	712044	170	736	633	498
regional_specificity_threshold	Z1p0	DEL	L_PI	-0.00934267	0.00931103	-1.0034	0.31567	712011	712043	645	6103	3984	2061
regional_specificity_threshold	Z1p0	DEL	L_a32pr	-0.0418648	0.00919398	-4.55351	5.2783e-06	712008	712039	1156	5696	3706	3436
regional_specificity_threshold	Z1p0	DEL	L_p24	-0.0489841	0.0107998	-4.53565	5.74534e-06	712006	712038	833	4494	2737	2551
regional_specificity_threshold	Z1p0	DUP	L_V1	-0.0132308	0.00621539	-2.12871	0.0332793	712023	712054	1815	14849	9155	3021
regional_specificity_threshold	Z1p0	DUP	L_MST	0.0148098	0.0219322	0.675251	0.499517	712022	712053	208	2054	1927	313
regional_specificity_threshold	Z1p0	DUP	L_V6	-0.00926261	0.00604122	-1.53324	0.125219	712023	712054	1849	16515	10156	2971
regional_specificity_threshold	Z1p0	DUP	L_V2	-0.00646218	0.00751138	-0.860319	0.389614	712023	712054	1459	12457	8329	2451
regional_specificity_threshold	Z1p0	DUP	L_V3	-0.0297701	0.0101586	-2.93055	0.00338397	712019	712051	925	6886	4837	1547
regional_specificity_threshold	Z1p0	DUP	L_V4	0.000785257	0.00835627	0.0939722	0.925131	712021	712053	956	9911	6629	1555
regional_specificity_threshold	Z1p0	DUP	L_V8	-0.0168876	0.00771452	-2.18907	0.0285929	712022	712054	1834	13390	8735	2909
regional_specificity_threshold	Z1p0	DUP	L_4	-0.00244238	0.00948888	-0.257394	0.796875	712022	712054	872	8268	5409	1361
regional_specificity_threshold	Z1p0	DUP	L_3b	-0.0317673	0.0106999	-2.96892	0.00298874	712019	712050	909	7725	6224	1425
regional_specificity_threshold	Z1p0	DUP	L_FEF	0.00714006	0.00920156	0.775962	0.437772	712020	712051	880	7258	4896	1380
regional_specificity_threshold	Z1p0	DUP	L_PEF	-0.0195222	0.00471043	-4.14446	3.40719e-05	712019	712050	3130	25949	12683	4942
regional_specificity_threshold	Z1p0	DUP	L_55b	-0.0370062	0.00722567	-5.12149	3.03355e-07	712009	712040	1745	15446	9905	2715
regional_specificity_threshold	Z1p0	DUP	L_V3A	-0.0524834	0.00826935	-6.34674	2.20288e-10	711997	712028	1309	10393	6845	2122
regional_specificity_threshold	Z1p0	DUP	L_RSC	-0.0332533	0.0110103	-3.02021	0.00252625	712019	712050	802	7383	4887	1260
regional_specificity_threshold	Z1p0	DUP	L_POS2	-0.02347	0.0127817	-1.83622	0.066327	712022	712053	647	4406	3572	1046
regional_specificity_threshold	Z1p0	DUP	L_V7	-0.0291904	0.00510556	-5.71738	1.08298e-08	712009	712040	2651	22846	13177	4194
regional_specificity_threshold	Z1p0	DUP	L_IPS1	-0.0335227	0.00563801	-5.94584	2.75396e-09	712005	712037	2177	19314	11139	3503
regional_specificity_threshold	Z1p0	DUP	L_FFC	-0.028016	0.00829493	-3.37749	0.00073162	712018	712050	1135	9912	6169	1845
regional_specificity_threshold	Z1p0	DUP	L_V3B	-0.0109366	0.00482986	-2.26437	0.0235522	712023	712054	2925	24390	13696	4615
regional_specificity_threshold	Z1p0	DUP	L_LO1	-0.0223062	0.00410974	-5.42765	5.71536e-08	712014	712045	2936	26061	12791	4757
regional_specificity_threshold	Z1p0	DUP	L_LO2	-0.0139445	0.00605805	-2.30182	0.0213463	712023	712054	2152	20880	14071	3475
regional_specificity_threshold	Z1p0	DUP	L_PIT	-0.0235572	0.00556296	-4.23465	2.28986e-05	712017	712048	2322	20280	12472	3723
regional_specificity_threshold	Z1p0	DUP	L_MT	-0.00605275	0.00419717	-1.4421	0.149275	712022	712054	2706	26771	12178	4331
regional_specificity_threshold	Z1p0	DUP	L_A1	0.0153094	0.00730659	2.09528	0.0361469	712011	712042	1715	15828	9864	2610
regional_specificity_threshold	Z1p0	DUP	L_PSL	-0.0531248	0.018668	-2.84577	0.00443074	712018	712049	291	2840	2561	461
regional_specificity_threshold	Z1p0	DUP	L_SFL	-0.0656455	0.0161351	-4.06848	4.73348e-05	712011	712043	511	2920	2522	792
regional_specificity_threshold	Z1p0	DUP	L_PCV	-0.0948416	0.0191683	-4.94783	7.50935e-07	712004	712035	295	2406	1878	490
regional_specificity_threshold	Z1p0	DUP	L_STV	-0.0971695	0.0245368	-3.96016	7.49212e-05	712010	712042	188	1636	1529	317
regional_specificity_threshold	Z1p0	DUP	L_7Pm	-0.0074638	0.0111253	-0.670887	0.502293	712023	712054	847	7128	5297	1376
regional_specificity_threshold	Z1p0	DUP	L_7m	-0.040429	0.0116622	-3.46666	0.000527055	712016	712048	394	5284	4028	595
regional_specificity_threshold	Z1p0	DUP	L_POS1	-0.0511936	0.0225378	-2.27146	0.0231201	712020	712051	263	1668	1506	454
regional_specificity_threshold	Z1p0	DUP	L_23d	-0.0245577	0.00469229	-5.23363	1.66346e-07	712013	712045	2034	21215	10474	3277
regional_specificity_threshold	Z1p0	DUP	L_v23ab	-0.0343339	0.00718786	-4.77665	1.78338e-06	712012	712043	1409	12883	8147	2245
regional_specificity_threshold	Z1p0	DUP	L_d23ab	-0.0326951	0.00898902	-3.63723	0.000275642	712017	712048	1343	11029	7432	2180
regional_specificity_threshold	Z1p0	DUP	L_31pv	-0.0151026	0.0109121	-1.38403	0.16635	712023	712054	674	6299	4189	1130
regional_specificity_threshold	Z1p0	DUP	L_5m	-1.3417e-05	0.0112391	-0.00119377	0.999048	712022	712054	842	8289	6877	1307
regional_specificity_threshold	Z1p0	DUP	L_5mv	-0.0187047	0.00796722	-2.34771	0.0188901	712022	712053	1455	12886	9360	2296
regional_specificity_threshold	Z1p0	DUP	L_23c	-0.0888192	0.0158496	-5.60387	2.0983e-08	711998	712030	412	3487	2807	656
regional_specificity_threshold	Z1p0	DUP	L_5L	-0.0156528	0.00928096	-1.68655	0.0916905	712023	712054	1035	8691	6272	1646
regional_specificity_threshold	Z1p0	DUP	L_24dd	-0.0398818	0.0104647	-3.81108	0.000138393	712015	712046	735	7721	6455	1182
regional_specificity_threshold	Z1p0	DUP	L_24dv	-0.00998196	0.0137362	-0.726692	0.467415	712023	712054	574	4529	4129	887
regional_specificity_threshold	Z1p0	DUP	L_7AL	0.0100805	0.0151712	0.664453	0.506401	712021	712053	333	4498	4173	529
regional_specificity_threshold	Z1p0	DUP	L_SCEF	0.0139575	0.0110496	1.26317	0.206528	712018	712050	692	7325	5966	1091
regional_specificity_threshold	Z1p0	DUP	L_6ma	-0.0105057	0.00949395	-1.10657	0.268483	712023	712054	1149	10837	8153	1788
regional_specificity_threshold	Z1p0	DUP	L_7Am	-0.0102032	0.0134422	-0.759043	0.447828	712023	712054	592	4390	3521	973
regional_specificity_threshold	Z1p0	DUP	L_7PL	-0.00297001	0.00787609	-0.377092	0.706106	712022	712054	1292	10082	7247	2040
regional_specificity_threshold	Z1p0	DUP	L_7PC	-0.0702029	0.0117727	-5.96321	2.4765e-09	711997	712028	607	5297	3832	1013
regional_specificity_threshold	Z1p0	DUP	L_LIPv	-0.00903099	0.00942376	-0.958321	0.337902	712023	712054	953	8128	5426	1525
regional_specificity_threshold	Z1p0	DUP	L_VIP	-0.0295321	0.00875504	-3.37316	0.000743222	712018	712049	975	9165	5754	1537
regional_specificity_threshold	Z1p0	DUP	L_MIP	-0.00406992	0.00689024	-0.590679	0.554736	712022	712054	1754	15375	9329	2727
regional_specificity_threshold	Z1p0	DUP	L_1	-0.017727	0.0095457	-1.85706	0.0633033	712022	712054	942	8987	6843	1460
regional_specificity_threshold	Z1p0	DUP	L_2	-0.0171427	0.0120617	-1.42125	0.155246	712023	712054	516	5580	4605	816
regional_specificity_threshold	Z1p0	DUP	L_3a	-0.000572285	0.00668238	-0.0856409	0.931752	712021	712052	1786	16057	9214	2795
regional_specificity_threshold	Z1p0	DUP	L_6d	-0.0081651	0.0104122	-0.784189	0.43293	712023	712054	955	8548	6235	1505
regional_specificity_threshold	Z1p0	DUP	L_6mp	-0.037777	0.0097173	-3.8876	0.000101266	712015	712046	1047	8796	6198	1630
regional_specificity_threshold	Z1p0	DUP	L_6v	-0.0148807	0.00982019	-1.51532	0.129693	712023	712054	1002	8606	6370	1590
regional_specificity_threshold	Z1p0	DUP	L_p24pr	-0.00715865	0.00617693	-1.15893	0.246484	712023	712054	2229	19560	11343	3487
regional_specificity_threshold	Z1p0	DUP	L_33pr	-0.0045282	0.00493601	-0.917381	0.358944	712022	712053	2361	20666	10495	3706
regional_specificity_threshold	Z1p0	DUP	L_a24pr	-0.0196018	0.00410172	-4.77892	1.76338e-06	712017	712049	2436	24835	10943	3827
regional_specificity_threshold	Z1p0	DUP	L_p32pr	-0.025543	0.00465775	-5.48398	4.16248e-08	712012	712043	2180	21634	11042	3457
regional_specificity_threshold	Z1p0	DUP	L_a24	-0.04218	0.00745338	-5.65918	1.52255e-08	712004	712036	1598	12238	8048	2525
regional_specificity_threshold	Z1p0	DUP	L_d32	-0.0151111	0.00853267	-1.77096	0.0765679	712023	712054	1214	9195	6698	1919
regional_specificity_threshold	Z1p0	DUP	L_8BM	-0.0558859	0.0103104	-5.42033	5.95413e-08	712003	712035	991	8184	6197	1571
regional_specificity_threshold	Z1p0	DUP	L_p32	-0.0303649	0.00425932	-7.12905	1.01326e-12	712000	712031	2813	25868	13971	4434
regional_specificity_threshold	Z1p0	DUP	L_10r	-0.0379554	0.0102963	-3.68632	0.00022757	712016	712047	800	7306	5413	1248
regional_specificity_threshold	Z1p0	DUP	L_47m	-0.0143903	0.006271	-2.29473	0.0217491	712023	712054	2002	18533	11765	3157
regional_specificity_threshold	Z1p0	DUP	L_8Av	0.00690632	0.00966138	0.714838	0.47471	712020	712051	926	8945	6119	1445
regional_specificity_threshold	Z1p0	DUP	L_8Ad	-0.0289222	0.00736632	-3.92627	8.62961e-05	712016	712048	1139	10517	6433	1750
regional_specificity_threshold	Z1p0	DUP	L_9m	-0.0640197	0.0107054	-5.98013	2.23247e-09	711998	712029	706	6553	4577	1127
regional_specificity_threshold	Z1p0	DUP	L_8BL	-0.0354651	0.0207173	-1.71186	0.0869245	712022	712053	250	1929	1545	395
regional_specificity_threshold	Z1p0	DUP	L_9p	-0.00991846	0.00619041	-1.60223	0.109106	712023	712054	1383	14951	7949	2187
regional_specificity_threshold	Z1p0	DUP	L_10d	-0.0134896	0.0060803	-2.21857	0.0265165	712023	712054	1903	16057	9127	3034
regional_specificity_threshold	Z1p0	DUP	L_8C	-0.0310071	0.0104253	-2.97422	0.00293759	712019	712050	979	8305	6250	1539
regional_specificity_threshold	Z1p0	DUP	L_44	-0.0586077	0.00899038	-6.51893	7.09386e-11	711994	712025	863	6993	4412	1388
regional_specificity_threshold	Z1p0	DUP	L_45	-0.0209555	0.0105318	-1.98972	0.0466223	712022	712053	1022	8994	7395	1561
regional_specificity_threshold	Z1p0	DUP	L_47l	-0.0415125	0.00874106	-4.74914	2.04397e-06	712010	712041	1512	10903	7750	2384
regional_specificity_threshold	Z1p0	DUP	L_a47r	-0.0485636	0.029056	-1.67138	0.0946479	712021	712053	102	1062	1025	160
regional_specificity_threshold	Z1p0	DUP	L_6r	-0.0140753	0.00698956	-2.01376	0.0440357	712023	712054	1316	15152	11114	2058
regional_specificity_threshold	Z1p0	DUP	L_IFJa	-0.0188649	0.0047941	-3.93502	8.32125e-05	712020	712051	2344	21949	11855	3752
regional_specificity_threshold	Z1p0	DUP	L_IFJp	-0.00486193	0.00617171	-0.787777	0.430828	712022	712054	2030	17805	11618	3095
regional_specificity_threshold	Z1p0	DUP	L_IFSp	-0.0306219	0.0109767	-2.78971	0.00527598	712020	712051	787	6768	4522	1269
regional_specificity_threshold	Z1p0	DUP	L_IFSa	-0.0363534	0.00477856	-7.60761	2.80155e-14	711992	712023	2017	17957	9129	3244
regional_specificity_threshold	Z1p0	DUP	L_p9.46v	-0.0276575	0.00303252	-9.1203	7.54317e-20	711987	712018	3718	35244	15895	5996
regional_specificity_threshold	Z1p0	DUP	L_46	-0.0435048	0.00713412	-6.09813	1.0747e-09	712001	712032	1245	9848	5727	2012
regional_specificity_threshold	Z1p0	DUP	L_a9.46v	-0.0165607	0.00791178	-2.09317	0.0363345	712022	712054	940	10341	6837	1514
regional_specificity_threshold	Z1p0	DUP	L_9.46d	-0.0270223	0.0092467	-2.92238	0.00347403	712020	712051	908	10078	6684	1443
regional_specificity_threshold	Z1p0	DUP	L_9a	-0.0477905	0.0186494	-2.56257	0.0103906	712019	712050	325	2480	2162	497
regional_specificity_threshold	Z1p0	DUP	L_10v	-0.0417471	0.00612908	-6.81133	9.69139e-12	711996	712027	1236	11875	7036	1964
regional_specificity_threshold	Z1p0	DUP	L_a10p	-0.0339512	0.00538359	-6.30641	2.86034e-10	712003	712034	1972	17983	10061	3148
regional_specificity_threshold	Z1p0	DUP	L_10pp	-0.0275377	0.00985055	-2.79555	0.00518152	712020	712051	706	7348	4880	1117
regional_specificity_threshold	Z1p0	DUP	L_11l	0.0202825	0.0174209	1.16426	0.244319	712020	712051	245	2611	2135	388
regional_specificity_threshold	Z1p0	DUP	L_13l	-0.0566338	0.0130078	-4.35383	1.33831e-05	712010	712042	592	4317	3244	951
regional_specificity_threshold	Z1p0	DUP	L_OFC	-0.0540418	0.0113054	-4.7802	1.7522e-06	712008	712039	738	6713	5255	1148
regional_specificity_threshold	Z1p0	DUP	L_47s	-0.025099	0.0105681	-2.37498	0.0175506	712021	712052	865	8419	6770	1362
regional_specificity_threshold	Z1p0	DUP	L_LIPd	-0.0176343	0.00710239	-2.48287	0.0130336	712022	712053	1497	10893	6575	2412
regional_specificity_threshold	Z1p0	DUP	L_6a	-0.0472198	0.0155272	-3.0411	0.00235737	712017	712049	385	3521	2965	584
regional_specificity_threshold	Z1p0	DUP	L_i6.8	-0.0437489	0.0120924	-3.61789	0.000297066	712015	712047	604	4568	3026	965
regional_specificity_threshold	Z1p0	DUP	L_s6.8	-0.0360321	0.0088163	-4.08698	4.37149e-05	712014	712046	903	7039	4481	1454
regional_specificity_threshold	Z1p0	DUP	L_43	-0.0479527	0.00851174	-5.63371	1.76557e-08	712003	712034	731	8677	6101	1152
regional_specificity_threshold	Z1p0	DUP	L_OP4	-0.0032225	0.020209	-0.159459	0.873308	712023	712054	246	1221	918	395
regional_specificity_threshold	Z1p0	DUP	L_OP1	-0.0489981	0.0888786	-0.551292	0.581434	712023	712054	24	115	114	47
regional_specificity_threshold	Z1p0	DUP	L_OP2.3	-0.0346065	0.00589271	-5.87276	4.29122e-09	712005	712037	1817	16043	9119	2987
regional_specificity_threshold	Z1p0	DUP	L_52	-0.0184345	0.00586276	-3.14433	0.00166484	712021	712052	1987	20792	11254	3093
regional_specificity_threshold	Z1p0	DUP	L_RI	-0.0240756	0.00557405	-4.31923	1.56633e-05	712017	712048	2153	20217	12210	3545
regional_specificity_threshold	Z1p0	DUP	L_PFcm	-0.026001	0.00459364	-5.66023	1.51332e-08	712011	712042	2508	22059	11981	4084
regional_specificity_threshold	Z1p0	DUP	L_PoI2	-0.0183903	0.00811592	-2.26595	0.0234551	712022	712053	1220	10470	7107	1913
regional_specificity_threshold	Z1p0	DUP	L_TA2	-0.0490128	0.0136612	-3.58775	0.000333612	712015	712046	583	4775	3896	952
regional_specificity_threshold	Z1p0	DUP	L_FOP4	-0.0259756	0.00750937	-3.4591	0.000542076	712019	712050	1648	14243	9749	2572
regional_specificity_threshold	Z1p0	DUP	L_MI	-0.0534905	0.00967684	-5.52768	3.248e-08	712003	712034	1058	8262	6191	1648
regional_specificity_threshold	Z1p0	DUP	L_Pir	-0.0102707	0.00552381	-1.85934	0.0629797	712023	712054	2340	20414	12663	3660
regional_specificity_threshold	Z1p0	DUP	L_AVI	-0.050066	0.0107167	-4.67179	2.98741e-06	712009	712040	836	8338	6601	1311
regional_specificity_threshold	Z1p0	DUP	L_AAIC	0.0339723	0.0216003	1.57277	0.115773	712019	712050	206	2002	1954	355
regional_specificity_threshold	Z1p0	DUP	L_FOP1	-0.0463188	0.00813933	-5.69074	1.26624e-08	712003	712034	1102	9106	5460	1764
regional_specificity_threshold	Z1p0	DUP	L_FOP3	-0.030821	0.00712838	-4.3237	1.53488e-05	712015	712046	1859	15127	9997	2955
regional_specificity_threshold	Z1p0	DUP	L_FOP2	-0.0167019	0.00572605	-2.91682	0.00353648	712022	712053	1947	17463	9653	3118
regional_specificity_threshold	Z1p0	DUP	L_PFt	-0.0195616	0.00629796	-3.10603	0.0018964	712021	712052	2168	20413	12626	3437
regional_specificity_threshold	Z1p0	DUP	L_AIP	-0.0410432	0.0076626	-5.3563	8.50181e-08	712007	712038	1206	10063	5760	1949
regional_specificity_threshold	Z1p0	DUP	L_EC	-0.0115276	0.00569339	-2.02474	0.0428954	712023	712054	2285	19012	10608	3550
regional_specificity_threshold	Z1p0	DUP	L_PreS	-0.00606491	0.00539775	-1.1236	0.261185	712023	712054	2244	21025	10857	3588
regional_specificity_threshold	Z1p0	DUP	L_H	-0.0119429	0.00559485	-2.13462	0.0327928	712023	712054	2487	18868	10802	3944
regional_specificity_threshold	Z1p0	DUP	L_ProS	0.0273859	0.00946141	2.89448	0.00379817	712007	712039	614	6966	5009	985
regional_specificity_threshold	Z1p0	DUP	L_PeEc	-0.017209	0.00628723	-2.73713	0.00619827	712022	712053	1671	15955	8700	2616
regional_specificity_threshold	Z1p0	DUP	L_STGa	-0.0396848	0.00853052	-4.6521	3.2874e-06	712011	712042	1287	10590	7331	2074
regional_specificity_threshold	Z1p0	DUP	L_PBelt	-0.015604	0.0106741	-1.46185	0.143782	712023	712054	693	7434	5171	1111
regional_specificity_threshold	Z1p0	DUP	L_A5	-0.00376176	0.0169797	-0.221544	0.824669	712023	712054	374	3563	3128	578
regional_specificity_threshold	Z1p0	DUP	L_PHA1	-0.00384543	0.00495549	-0.775994	0.437753	712021	712053	1653	13110	7268	2610
regional_specificity_threshold	Z1p0	DUP	L_PHA3	-0.0105063	0.00802981	-1.30841	0.190736	712023	712054	1064	11081	6692	1675
regional_specificity_threshold	Z1p0	DUP	L_STSda	-0.0791881	0.0175202	-4.51981	6.19215e-06	712008	712039	304	2657	2023	515
regional_specificity_threshold	Z1p0	DUP	L_STSdp	-0.0509927	0.0112188	-4.54529	5.48841e-06	712010	712041	539	5989	4620	896
regional_specificity_threshold	Z1p0	DUP	L_STSvp	-0.0765132	0.011666	-6.55865	5.4398e-11	711991	712022	869	6376	4838	1418
regional_specificity_threshold	Z1p0	DUP	L_TGd	-0.0370662	0.00898405	-4.12578	3.69592e-05	712014	712045	1040	9393	6465	1645
regional_specificity_threshold	Z1p0	DUP	L_TE1a	0.0191678	0.0214255	0.894626	0.370988	712021	712053	267	2288	2013	415
regional_specificity_threshold	Z1p0	DUP	L_TE1p	-0.153583	0.040941	-3.75133	0.00017594	712011	712042	75	614	596	124
regional_specificity_threshold	Z1p0	DUP	L_TE2a	0.0197261	0.0212606	0.927827	0.353498	712021	712053	303	2064	1968	474
regional_specificity_threshold	Z1p0	DUP	L_TF	-0.0482121	0.00959622	-5.02407	5.06206e-07	712007	712039	705	7366	5308	1135
regional_specificity_threshold	Z1p0	DUP	L_TE2p	-0.0308396	0.0218786	-1.40958	0.158664	712022	712054	190	1737	1629	272
regional_specificity_threshold	Z1p0	DUP	L_PHT	-0.0831161	0.0218548	-3.80311	0.000142927	712012	712043	253	1972	1658	411
regional_specificity_threshold	Z1p0	DUP	L_PH	-0.109965	0.0275188	-3.996	6.44396e-05	712010	712041	111	1455	1407	171
regional_specificity_threshold	Z1p0	DUP	L_TPOJ1	0.0423587	0.0219282	1.9317	0.0533971	712017	712049	222	2192	2027	379
regional_specificity_threshold	Z1p0	DUP	L_TPOJ2	-0.0659947	0.0181449	-3.63709	0.000275787	712014	712045	283	1850	1487	461
regional_specificity_threshold	Z1p0	DUP	L_TPOJ3	-0.0202852	0.00916674	-2.21292	0.0269044	712022	712053	929	10593	7617	1507
regional_specificity_threshold	Z1p0	DUP	L_DVT	-0.0182006	0.00669197	-2.71976	0.00653328	712022	712053	1524	13080	7089	2448
regional_specificity_threshold	Z1p0	DUP	L_PGp	-0.0248256	0.0144823	-1.71421	0.0864918	712022	712053	430	4427	3610	694
regional_specificity_threshold	Z1p0	DUP	L_IP2	-0.0253093	0.00940509	-2.69103	0.00712371	712020	712052	740	7045	4630	1193
regional_specificity_threshold	Z1p0	DUP	L_IP1	-0.0335164	0.00725812	-4.61778	3.88051e-06	712013	712044	1362	12054	7261	2198
regional_specificity_threshold	Z1p0	DUP	L_IP0	-0.02222	0.00573714	-3.87302	0.000107523	712019	712050	2055	19696	11431	3332
regional_specificity_threshold	Z1p0	DUP	L_PFop	0.015549	0.00795029	1.95578	0.050492	712013	712044	793	10031	6346	1259
regional_specificity_threshold	Z1p0	DUP	L_PF	0.0317608	0.018087	1.756	0.07909	712018	712049	140	2327	2115	232
regional_specificity_threshold	Z1p0	DUP	L_PFm	-0.0669456	0.0158757	-4.21687	2.47801e-05	712010	712042	254	3472	2851	405
regional_specificity_threshold	Z1p0	DUP	L_PGi	-0.0283877	0.00712572	-3.98384	6.78305e-05	712016	712048	1537	14746	9353	2439
regional_specificity_threshold	Z1p0	DUP	L_PGs	-0.000772264	0.0194985	-0.0396063	0.968407	712023	712054	289	2647	2535	489
regional_specificity_threshold	Z1p0	DUP	L_V6A	-0.0249036	0.00549877	-4.52894	5.93064e-06	712016	712047	2618	22181	12150	4216
regional_specificity_threshold	Z1p0	DUP	L_VMV1	-0.0135329	0.00584116	-2.31681	0.0205149	712023	712054	1711	14941	7907	2786
regional_specificity_threshold	Z1p0	DUP	L_VMV3	0.0111501	0.0119804	0.930695	0.352012	712020	712051	807	6176	5341	1327
regional_specificity_threshold	Z1p0	DUP	L_PHA2	-0.0172091	0.00642864	-2.67694	0.00743029	712022	712053	1834	16518	9937	2949
regional_specificity_threshold	Z1p0	DUP	L_V4t	-0.0144524	0.00461475	-3.13178	0.00173768	712022	712054	3125	28078	13608	4910
regional_specificity_threshold	Z1p0	DUP	L_FST	-0.00897893	0.014747	-0.608867	0.542613	712023	712054	461	4360	3657	753
regional_specificity_threshold	Z1p0	DUP	L_V3CD	-0.0155324	0.0189489	-0.819699	0.412389	712023	712054	296	2671	2559	508
regional_specificity_threshold	Z1p0	DUP	L_LO3	-0.0112816	0.00589369	-1.91419	0.0555972	712023	712054	1825	15453	9760	2917
regional_specificity_threshold	Z1p0	DUP	L_VMV2	-0.00360339	0.0105504	-0.34154	0.732697	712023	712054	826	8507	6310	1354
regional_specificity_threshold	Z1p0	DUP	L_31pd	-0.00846615	0.00773867	-1.09401	0.273954	712023	712054	721	9294	6344	1068
regional_specificity_threshold	Z1p0	DUP	L_31a	-0.00573383	0.010158	-0.564464	0.572439	712023	712054	675	5670	3566	1072
regional_specificity_threshold	Z1p0	DUP	L_VVC	-0.0147169	0.00555445	-2.64956	0.00806006	712022	712054	1569	12444	6953	2491
regional_specificity_threshold	Z1p0	DUP	L_25	-0.0197591	0.00765601	-2.58087	0.00985577	712021	712053	1406	12465	7623	2213
regional_specificity_threshold	Z1p0	DUP	L_s32	-0.0315044	0.00438456	-7.18531	6.72336e-13	711998	712030	2442	23019	11263	3904
regional_specificity_threshold	Z1p0	DUP	L_pOFC	-0.0233221	0.00650386	-3.58589	0.00033599	712019	712050	2030	16045	9515	3153
regional_specificity_threshold	Z1p0	DUP	L_PoI1	-0.0193079	0.00592526	-3.25858	0.00111985	712021	712052	1771	17406	10278	2801
regional_specificity_threshold	Z1p0	DUP	L_Ig	-0.0115905	0.00929035	-1.24758	0.212186	712023	712054	1079	9018	6422	1739
regional_specificity_threshold	Z1p0	DUP	L_FOP5	0.00229678	0.00597527	0.384381	0.700696	712019	712050	1858	16837	9841	2886
regional_specificity_threshold	Z1p0	DUP	L_p10p	-0.0176044	0.00560164	-3.14273	0.00167401	712021	712053	1377	13700	7723	2145
regional_specificity_threshold	Z1p0	DUP	L_p47r	-0.0150821	0.00904112	-1.66817	0.0952831	712023	712054	943	7795	4970	1442
regional_specificity_threshold	Z1p0	DUP	L_TGv	-0.0588927	0.00862927	-6.82476	8.82654e-12	711991	712022	1100	10311	6868	1758
regional_specificity_threshold	Z1p0	DUP	L_MBelt	-0.00859396	0.0123651	-0.695019	0.487044	712023	712054	482	5877	4892	778
regional_specificity_threshold	Z1p0	DUP	L_LBelt	-0.00222155	0.00506685	-0.438448	0.661062	712021	712052	2627	22725	12990	4092
regional_specificity_threshold	Z1p0	DUP	L_A4	-0.0234505	0.0185314	-1.26544	0.205714	712023	712054	320	3217	3023	505
regional_specificity_threshold	Z1p0	DUP	L_STSva	-0.00578622	0.0082401	-0.702203	0.482553	712023	712054	1372	11431	7622	2159
regional_specificity_threshold	Z1p0	DUP	L_TE1m	-0.0672678	0.0166875	-4.03103	5.55485e-05	712011	712043	324	3249	2685	498
regional_specificity_threshold	Z1p0	DUP	L_PI	-0.0118012	0.00640702	-1.84192	0.0654884	712023	712054	1326	13549	8398	2061
regional_specificity_threshold	Z1p0	DUP	L_a32pr	-0.0212381	0.00478567	-4.43784	9.09038e-06	712017	712049	2237	19474	10139	3436
regional_specificity_threshold	Z1p0	DUP	L_p24	-0.0342815	0.00634861	-5.39985	6.67558e-08	712008	712040	1666	14638	8394	2551
regional_specificity_threshold	Z1p2	DEL	L_V1	-0.0813122	0.0121688	-6.68203	2.36126e-11	711988	712020	763	5599	4828	2411
regional_specificity_threshold	Z1p2	DEL	L_MST	-0.231662	0.150759	-1.53664	0.124383	712011	712042	23	41	41	59
regional_specificity_threshold	Z1p2	DEL	L_V6	-0.0691634	0.0128301	-5.39069	7.02488e-08	711999	712030	693	3373	2245	2181
regional_specificity_threshold	Z1p2	DEL	L_V2	-0.152346	0.0167601	-9.08981	9.98842e-20	711951	711983	549	3059	2600	1820
regional_specificity_threshold	Z1p2	DEL	L_V3	-0.0255709	0.0172541	-1.48202	0.138335	712013	712044	292	3021	2839	1024
regional_specificity_threshold	Z1p2	DEL	L_V4	-0.0411559	0.0279871	-1.47053	0.141419	712012	712044	266	1171	1042	824
regional_specificity_threshold	Z1p2	DEL	L_V8	-0.0594371	0.0149349	-3.97975	6.90056e-05	712006	712038	699	3288	2560	2263
regional_specificity_threshold	Z1p2	DEL	L_4	-0.0645736	0.0274938	-2.34867	0.0188416	712011	712042	248	1059	870	799
regional_specificity_threshold	Z1p2	DEL	L_3b	-0.185482	0.0224351	-8.2675	1.37437e-16	711959	711991	259	1888	1761	812
regional_specificity_threshold	Z1p2	DEL	L_FEF	-0.00473156	0.0181058	-0.261329	0.793839	712012	712043	310	2262	1949	965
regional_specificity_threshold	Z1p2	DEL	L_PEF	-0.0842853	0.00891088	-9.45869	3.14301e-21	711962	711993	1363	7253	4181	4326
regional_specificity_threshold	Z1p2	DEL	L_55b	-0.0736545	0.0144121	-5.11059	3.21384e-07	712000	712031	682	3366	2427	2100
regional_specificity_threshold	Z1p2	DEL	L_V3A	-0.0195677	0.0144817	-1.3512	0.176632	712013	712044	434	3649	3112	1440
regional_specificity_threshold	Z1p2	DEL	L_RSC	0.0390247	0.0199527	1.95587	0.050482	712004	712035	320	1750	1358	944
regional_specificity_threshold	Z1p2	DEL	L_POS2	-0.0406063	0.0287307	-1.41334	0.157557	712013	712044	199	1045	995	580
regional_specificity_threshold	Z1p2	DEL	L_V7	-0.024053	0.00924024	-2.60307	0.00923975	712013	712044	1163	9005	7160	3518
regional_specificity_threshold	Z1p2	DEL	L_IPS1	-0.0759654	0.0105332	-7.21196	5.53003e-13	711986	712017	842	6631	5356	2761
regional_specificity_threshold	Z1p2	DEL	L_FFC	-0.0619416	0.0197685	-3.13334	0.00172848	712009	712040	371	1751	1263	1171
regional_specificity_threshold	Z1p2	DEL	L_V3B	-0.0614509	0.00847421	-7.25151	4.13284e-13	711990	712021	1418	7707	4616	4160
regional_specificity_threshold	Z1p2	DEL	L_LO1	-0.0728433	0.00783288	-9.29969	1.41909e-20	711968	711999	1337	7888	4551	4271
regional_specificity_threshold	Z1p2	DEL	L_LO2	-0.0783929	0.0122028	-6.42418	1.32811e-10	711991	712022	893	5763	4747	2596
regional_specificity_threshold	Z1p2	DEL	L_PIT	-0.0322267	0.00972553	-3.31362	0.000921092	712012	712043	1012	5905	4343	3246
regional_specificity_threshold	Z1p2	DEL	L_MT	-0.0351735	0.00739711	-4.75503	1.98526e-06	712009	712041	1281	11386	7910	3930
regional_specificity_threshold	Z1p2	DEL	L_A1	-0.0906397	0.0167962	-5.39645	6.80331e-08	711996	712027	622	3270	2739	1833
regional_specificity_threshold	Z1p2	DEL	L_PSL	0.0032792	0.0666474	0.0492022	0.960758	712013	712044	57	198	191	187
regional_specificity_threshold	Z1p2	DEL	L_SFL	-0.0273683	0.0398882	-0.686124	0.492636	712013	712044	139	535	483	408
regional_specificity_threshold	Z1p2	DEL	L_PCV	-0.0639407	0.067116	-0.95269	0.340748	712013	712044	58	231	224	206
regional_specificity_threshold	Z1p2	DEL	L_STV	-0.127589	0.0525785	-2.42663	0.0152406	712009	712040	37	345	344	113
regional_specificity_threshold	Z1p2	DEL	L_7Pm	-0.12218	0.0213125	-5.73276	9.89168e-09	711991	712022	260	1703	1408	861
regional_specificity_threshold	Z1p2	DEL	L_7m	-0.0660299	0.0444624	-1.48507	0.137526	712012	712043	114	445	416	338
regional_specificity_threshold	Z1p2	DEL	L_POS1	0.0675984	0.0631504	1.07043	0.284425	712011	712042	45	219	210	155
regional_specificity_threshold	Z1p2	DEL	L_23d	-0.0915306	0.00772554	-11.8478	2.25238e-32	711927	711958	803	6846	3497	2514
regional_specificity_threshold	Z1p2	DEL	L_v23ab	-0.0976919	0.0162825	-5.99981	1.9781e-09	711991	712022	544	2671	2054	1621
regional_specificity_threshold	Z1p2	DEL	L_d23ab	-0.0300946	0.0176101	-1.70894	0.087464	712013	712044	488	2207	1647	1521
regional_specificity_threshold	Z1p2	DEL	L_31pv	-0.103881	0.0240956	-4.31122	1.62417e-05	712001	712033	213	1265	1012	653
regional_specificity_threshold	Z1p2	DEL	L_5m	-0.141322	0.0216916	-6.51507	7.27905e-11	711982	712014	242	1944	1805	759
regional_specificity_threshold	Z1p2	DEL	L_5mv	-0.0529276	0.0123273	-4.29353	1.7592e-05	712006	712038	546	5864	5285	1669
regional_specificity_threshold	Z1p2	DEL	L_23c	-0.0980783	0.040702	-2.40967	0.0159677	712009	712041	93	596	581	306
regional_specificity_threshold	Z1p2	DEL	L_5L	-0.135936	0.0203945	-6.66534	2.6458e-11	711981	712013	300	2177	1982	881
regional_specificity_threshold	Z1p2	DEL	L_24dd	-0.0939807	0.0313596	-2.99687	0.00272792	712008	712039	214	818	728	652
regional_specificity_threshold	Z1p2	DEL	L_24dv	-0.0389823	0.0347142	-1.12295	0.261459	712013	712044	162	611	542	491
regional_specificity_threshold	Z1p2	DEL	L_7AL	-0.00694989	0.020465	-0.339599	0.734159	712012	712044	80	2269	2265	215
regional_specificity_threshold	Z1p2	DEL	L_SCEF	-0.00417423	0.0306173	-0.136336	0.891556	712013	712044	229	979	909	678
regional_specificity_threshold	Z1p2	DEL	L_6ma	-0.137582	0.018448	-7.45781	8.82424e-14	711973	712005	372	2754	2451	1032
regional_specificity_threshold	Z1p2	DEL	L_7Am	-0.0524596	0.0239511	-2.19027	0.0285052	712011	712043	177	1536	1481	524
regional_specificity_threshold	Z1p2	DEL	L_7PL	-0.0749973	0.0108959	-6.88307	5.87083e-12	711988	712020	517	5625	4345	1443
regional_specificity_threshold	Z1p2	DEL	L_7PC	-0.14772	0.035651	-4.14351	3.42134e-05	712000	712032	136	657	565	464
regional_specificity_threshold	Z1p2	DEL	L_LIPv	-0.0944119	0.020439	-4.61921	3.85387e-06	712000	712032	336	2196	2047	1024
regional_specificity_threshold	Z1p2	DEL	L_VIP	-0.116589	0.0256724	-4.54141	5.59034e-06	711999	712031	261	1132	931	793
regional_specificity_threshold	Z1p2	DEL	L_MIP	-0.0100812	0.0112668	-0.894774	0.370909	712012	712043	679	7064	6157	2173
regional_specificity_threshold	Z1p2	DEL	L_1	-0.189706	0.0211947	-8.95065	3.55637e-19	711950	711981	241	2042	1788	766
regional_specificity_threshold	Z1p2	DEL	L_2	-0.203737	0.0250658	-8.12812	4.37907e-16	711960	711991	123	1545	1518	379
regional_specificity_threshold	Z1p2	DEL	L_3a	-0.0632217	0.0151052	-4.18543	2.84716e-05	712005	712037	691	2746	1890	2150
regional_specificity_threshold	Z1p2	DEL	L_6d	-0.165859	0.0199366	-8.31933	8.88859e-17	711960	711992	296	2258	2025	919
regional_specificity_threshold	Z1p2	DEL	L_6mp	-0.100825	0.0245099	-4.11367	3.8954e-05	712002	712034	320	1464	1240	1065
regional_specificity_threshold	Z1p2	DEL	L_6v	-0.0933227	0.0244355	-3.81914	0.000133951	712004	712036	321	1445	1188	1020
regional_specificity_threshold	Z1p2	DEL	L_p24pr	-0.0569757	0.011141	-5.11405	3.15544e-07	712003	712034	989	5554	4360	2896
regional_specificity_threshold	Z1p2	DEL	L_33pr	-0.0236931	0.0110593	-2.14236	0.0321653	712013	712044	1065	5422	3979	3238
regional_specificity_threshold	Z1p2	DEL	L_a24pr	-0.0257858	0.00990568	-2.60313	0.00923812	712013	712044	977	5155	3397	3193
regional_specificity_threshold	Z1p2	DEL	L_p32pr	-0.045437	0.0126644	-3.58778	0.000333572	712009	712041	845	3291	2017	2639
regional_specificity_threshold	Z1p2	DEL	L_a24	-0.0444174	0.0145068	-3.06183	0.00220013	712010	712042	580	3170	2626	1878
regional_specificity_threshold	Z1p2	DEL	L_d32	-0.0159316	0.0212193	-0.750808	0.452769	712013	712044	400	1697	1471	1180
regional_specificity_threshold	Z1p2	DEL	L_8BM	-0.0432429	0.0258622	-1.67205	0.0945152	712012	712044	296	1392	1250	914
regional_specificity_threshold	Z1p2	DEL	L_p32	-0.0209711	0.00845362	-2.48073	0.0131121	712013	712044	1210	7456	5343	3828
regional_specificity_threshold	Z1p2	DEL	L_10r	-0.0134881	0.022206	-0.607409	0.54358	712013	712044	226	1632	1473	703
regional_specificity_threshold	Z1p2	DEL	L_47m	-0.0998819	0.0117761	-8.48178	2.22924e-17	711968	711999	799	4508	2946	2463
regional_specificity_threshold	Z1p2	DEL	L_8Av	-0.0676375	0.0290868	-2.32537	0.0200531	712010	712042	270	1072	959	932
regional_specificity_threshold	Z1p2	DEL	L_8Ad	-0.140691	0.0201469	-6.98326	2.89096e-12	711978	712009	329	2244	1993	1035
regional_specificity_threshold	Z1p2	DEL	L_9m	0.0033852	0.0318925	0.106144	0.915468	712012	712044	174	834	718	499
regional_specificity_threshold	Z1p2	DEL	L_8BL	-0.0646124	0.0416641	-1.55079	0.120952	712012	712043	57	483	445	175
regional_specificity_threshold	Z1p2	DEL	L_9p	-0.0634818	0.0161309	-3.93542	8.30718e-05	712006	712038	515	2563	1730	1570
regional_specificity_threshold	Z1p2	DEL	L_10d	-0.070274	0.0137565	-5.10841	3.25118e-07	712000	712032	706	3831	2997	2144
regional_specificity_threshold	Z1p2	DEL	L_8C	0.00936282	0.0264408	0.354105	0.723261	712012	712043	302	1238	1134	949
regional_specificity_threshold	Z1p2	DEL	L_44	-0.0870524	0.0215644	-4.03687	5.41856e-05	712004	712035	229	1512	1169	769
regional_specificity_threshold	Z1p2	DEL	L_45	-0.0522992	0.0252984	-2.06729	0.0387075	712012	712043	308	1354	1232	909
regional_specificity_threshold	Z1p2	DEL	L_47l	-0.00156437	0.0165179	-0.0947073	0.924547	712011	712043	531	2972	2495	1662
regional_specificity_threshold	Z1p2	DEL	L_a47r	0.0798207	0.105605	0.755839	0.449746	712012	712043	22	81	80	58
regional_specificity_threshold	Z1p2	DEL	L_6r	-0.0658922	0.0153508	-4.29242	1.76802e-05	712005	712036	446	3926	3602	1338
regional_specificity_threshold	Z1p2	DEL	L_IFJa	-0.0876462	0.0119179	-7.35416	1.92693e-13	711982	712013	931	4663	3330	3041
regional_specificity_threshold	Z1p2	DEL	L_IFJp	-0.0472911	0.0120658	-3.91942	8.87838e-05	712008	712040	808	5563	4716	2385
regional_specificity_threshold	Z1p2	DEL	L_IFSp	-0.231522	0.0390715	-5.92561	3.11526e-09	711984	712015	171	686	661	627
regional_specificity_threshold	Z1p2	DEL	L_IFSa	-0.0340293	0.0131379	-2.59016	0.00959363	712012	712043	670	2863	1825	2196
regional_specificity_threshold	Z1p2	DEL	L_p9.46v	-0.0578718	0.00598175	-9.67473	3.89452e-22	711973	712004	1740	10538	5849	5565
regional_specificity_threshold	Z1p2	DEL	L_46	-0.0421331	0.01983	-2.12472	0.0336112	712012	712043	339	1575	1114	1157
regional_specificity_threshold	Z1p2	DEL	L_a9.46v	-0.0498493	0.0208429	-2.39167	0.0167728	712011	712043	298	1249	867	915
regional_specificity_threshold	Z1p2	DEL	L_9.46d	-0.033682	0.033042	-1.01937	0.308029	712013	712044	256	816	718	820
regional_specificity_threshold	Z1p2	DEL	L_9a	-0.0769344	0.0552518	-1.39243	0.163793	712012	712043	66	263	243	210
regional_specificity_threshold	Z1p2	DEL	L_10v	-0.0358238	0.0158541	-2.25959	0.0238477	712012	712044	348	1840	1344	1171
regional_specificity_threshold	Z1p2	DEL	L_a10p	-0.0561784	0.0118174	-4.75385	1.99682e-06	712004	712036	737	5783	4893	2239
regional_specificity_threshold	Z1p2	DEL	L_10pp	0.0114344	0.0236678	0.483119	0.629012	712011	712042	176	1393	1229	526
regional_specificity_threshold	Z1p2	DEL	L_11l	-0.0462623	0.0943095	-0.490537	0.623754	712013	712044	41	99	96	128
regional_specificity_threshold	Z1p2	DEL	L_13l	0.0408616	0.0391229	1.04444	0.296282	712010	712042	151	500	425	456
regional_specificity_threshold	Z1p2	DEL	L_OFC	-0.0482956	0.0259828	-1.85875	0.0630638	712012	712043	185	1090	912	552
regional_specificity_threshold	Z1p2	DEL	L_47s	-0.00906098	0.0179801	-0.503944	0.614301	712012	712044	284	2767	2546	929
regional_specificity_threshold	Z1p2	DEL	L_LIPd	-0.057016	0.0154604	-3.68787	0.000226183	712008	712039	567	3142	2537	1705
regional_specificity_threshold	Z1p2	DEL	L_6a	-0.178436	0.0275574	-6.47507	9.4936e-11	711980	712012	97	1242	1220	266
regional_specificity_threshold	Z1p2	DEL	L_i6.8	-0.00666878	0.0365736	-0.182339	0.855317	712013	712044	151	611	546	512
regional_specificity_threshold	Z1p2	DEL	L_s6.8	-0.0640671	0.0284801	-2.24954	0.0244791	712011	712042	251	1007	846	788
regional_specificity_threshold	Z1p2	DEL	L_43	-0.0679323	0.0228773	-2.96942	0.00298388	712009	712040	193	937	653	610
regional_specificity_threshold	Z1p2	DEL	L_OP4	-0.124221	0.0655078	-1.89628	0.0579242	712011	712042	43	184	171	142
regional_specificity_threshold	Z1p2	DEL	L_OP1	0.123758	0.480229	0.257706	0.796634	712013	712044	2	4	4	9
regional_specificity_threshold	Z1p2	DEL	L_OP2.3	-0.0286213	0.00969306	-2.95276	0.00314975	712012	712044	666	5695	3377	2094
regional_specificity_threshold	Z1p2	DEL	L_52	-0.0883601	0.0101674	-8.69052	3.62833e-18	711969	712000	834	7223	5206	2620
regional_specificity_threshold	Z1p2	DEL	L_RI	-0.076206	0.0100875	-7.55451	4.21818e-14	711983	712014	915	6736	5341	2867
regional_specificity_threshold	Z1p2	DEL	L_PFcm	-0.0548901	0.0105262	-5.21461	1.84343e-07	712003	712034	1106	6864	5262	3451
regional_specificity_threshold	Z1p2	DEL	L_PoI2	-0.0100182	0.0107854	-0.928865	0.35296	712012	712043	423	4582	2795	1332
regional_specificity_threshold	Z1p2	DEL	L_TA2	0.00995215	0.022857	0.43541	0.663266	712011	712042	130	1845	1824	472
regional_specificity_threshold	Z1p2	DEL	L_FOP4	-0.00290858	0.0147162	-0.197646	0.843323	712011	712043	584	3835	3376	1798
regional_specificity_threshold	Z1p2	DEL	L_MI	0.00633894	0.0182889	0.3466	0.728892	712011	712042	331	2546	2347	974
regional_specificity_threshold	Z1p2	DEL	L_Pir	-0.0498605	0.0102216	-4.87794	1.07263e-06	712005	712037	1086	7119	5662	3224
regional_specificity_threshold	Z1p2	DEL	L_AVI	-0.00320072	0.0301818	-0.106048	0.915544	712013	712044	232	919	780	676
regional_specificity_threshold	Z1p2	DEL	L_AAIC	0.025506	0.0257527	0.990421	0.32197	712010	712041	35	1407	1405	105
regional_specificity_threshold	Z1p2	DEL	L_FOP1	0.0118336	0.017621	0.671564	0.501862	712009	712041	362	2742	2414	1075
regional_specificity_threshold	Z1p2	DEL	L_FOP3	-0.0410522	0.0120296	-3.4126	0.000643566	712010	712042	781	5803	4962	2368
regional_specificity_threshold	Z1p2	DEL	L_FOP2	-0.0442508	0.0123328	-3.58806	0.000333211	712010	712041	748	4271	3130	2485
regional_specificity_threshold	Z1p2	DEL	L_PFt	-0.0995135	0.012157	-8.1857	2.71941e-16	711971	712002	977	5331	4087	2863
regional_specificity_threshold	Z1p2	DEL	L_AIP	-0.0486734	0.0162208	-3.00069	0.00269397	712010	712042	409	2626	2122	1312
regional_specificity_threshold	Z1p2	DEL	L_EC	-0.0439828	0.0114456	-3.84277	0.00012168	712009	712040	1017	4410	2879	2978
regional_specificity_threshold	Z1p2	DEL	L_PreS	-0.00967265	0.00988989	-0.978034	0.328058	712011	712043	1064	7486	5967	3058
regional_specificity_threshold	Z1p2	DEL	L_H	-0.0303547	0.0116454	-2.60658	0.00914555	712012	712044	1176	4332	2933	3544
regional_specificity_threshold	Z1p2	DEL	L_ProS	-0.182388	0.0259945	-7.01642	2.28182e-12	711975	712006	141	1391	1347	488
regional_specificity_threshold	Z1p2	DEL	L_PeEc	-0.0277077	0.0139411	-1.98748	0.0468705	712013	712044	641	4162	3477	2030
regional_specificity_threshold	Z1p2	DEL	L_STGa	-0.0469668	0.0189105	-2.48364	0.0130055	712011	712043	430	2087	1621	1465
regional_specificity_threshold	Z1p2	DEL	L_PBelt	-0.0448627	0.0308824	-1.4527	0.14631	712012	712044	185	917	783	595
regional_specificity_threshold	Z1p2	DEL	L_A5	-0.106233	0.0579218	-1.83407	0.0666441	712011	712042	67	276	267	200
regional_specificity_threshold	Z1p2	DEL	L_PHA1	0.0085243	0.0116196	0.733616	0.463184	712006	712037	755	4608	3668	2127
regional_specificity_threshold	Z1p2	DEL	L_PHA3	-0.0111593	0.0233664	-0.477579	0.63295	712013	712044	357	1456	1230	1053
regional_specificity_threshold	Z1p2	DEL	L_STSda	-0.167226	0.0650658	-2.57011	0.0101672	712008	712039	59	221	218	203
regional_specificity_threshold	Z1p2	DEL	L_STSdp	0.00965621	0.0280196	0.344624	0.730378	712012	712043	144	867	696	473
regional_specificity_threshold	Z1p2	DEL	L_STSvp	-0.0559104	0.0283431	-1.97262	0.0485394	712012	712043	252	980	826	871
regional_specificity_threshold	Z1p2	DEL	L_TGd	-0.024941	0.0240878	-1.03542	0.300474	712013	712044	310	1232	952	1013
regional_specificity_threshold	Z1p2	DEL	L_TE1a	0.026456	0.0911775	0.290159	0.771695	712013	712044	30	106	102	112
regional_specificity_threshold	Z1p2	DEL	L_TE1p	0.0131928	0.178437	0.0739355	0.941062	712013	712044	13	29	29	36
regional_specificity_threshold	Z1p2	DEL	L_TE2a	-0.0440587	0.064347	-0.684705	0.493531	712013	712044	63	209	200	189
regional_specificity_threshold	Z1p2	DEL	L_TF	0.016084	0.0207721	0.774311	0.438748	712010	712041	185	1936	1787	595
regional_specificity_threshold	Z1p2	DEL	L_TE2p	-0.0274458	0.0584038	-0.469932	0.638404	712013	712044	45	269	267	107
regional_specificity_threshold	Z1p2	DEL	L_PHT	0.0121885	0.0547602	0.222579	0.823863	712013	712044	60	323	311	169
regional_specificity_threshold	Z1p2	DEL	L_PH	0.0853968	0.0819897	1.04156	0.297619	712011	712043	18	148	148	56
regional_specificity_threshold	Z1p2	DEL	L_TPOJ1	-0.0107696	0.0873029	-0.123359	0.901823	712013	712044	42	111	104	123
regional_specificity_threshold	Z1p2	DEL	L_TPOJ2	0.0048159	0.0530553	0.0907712	0.927674	712013	712044	48	274	218	175
regional_specificity_threshold	Z1p2	DEL	L_TPOJ3	-0.0490451	0.0166973	-2.93731	0.00331107	712010	712042	295	2481	2017	922
regional_specificity_threshold	Z1p2	DEL	L_DVT	-0.0730544	0.014328	-5.09873	3.42182e-07	712000	712031	583	3380	2515	1865
regional_specificity_threshold	Z1p2	DEL	L_PGp	-0.18223	0.0251663	-7.24104	4.46494e-13	711972	712003	87	1479	1408	293
regional_specificity_threshold	Z1p2	DEL	L_IP2	-0.0766057	0.027877	-2.74799	0.00599661	712009	712040	186	918	708	642
regional_specificity_threshold	Z1p2	DEL	L_IP1	-0.106803	0.0168416	-6.34164	2.27709e-10	711987	712019	460	2999	2562	1440
regional_specificity_threshold	Z1p2	DEL	L_IP0	-0.0769327	0.0103644	-7.42277	1.15049e-13	711984	712015	767	6651	4710	2472
regional_specificity_threshold	Z1p2	DEL	L_PFop	-0.125058	0.0144626	-8.64701	5.31591e-18	711961	711992	273	2920	1840	876
regional_specificity_threshold	Z1p2	DEL	L_PF	-0.062763	0.210491	-0.298174	0.765571	712013	712044	12	21	21	41
regional_specificity_threshold	Z1p2	DEL	L_PFm	-0.0320392	0.0556144	-0.576096	0.564551	712013	712044	53	326	323	182
regional_specificity_threshold	Z1p2	DEL	L_PGi	-0.0861947	0.0133491	-6.45695	1.07023e-10	711989	712021	607	4108	3344	1817
regional_specificity_threshold	Z1p2	DEL	L_PGs	-0.0151451	0.0718686	-0.210734	0.833095	712013	712044	63	177	174	172
regional_specificity_threshold	Z1p2	DEL	L_V6A	-0.0173879	0.00847567	-2.0515	0.0402188	712013	712044	1240	8561	6371	3763
regional_specificity_threshold	Z1p2	DEL	L_VMV1	-0.0239046	0.0117403	-2.03612	0.0417398	712013	712044	688	4813	3831	2160
regional_specificity_threshold	Z1p2	DEL	L_VMV3	-0.120087	0.0232134	-5.17318	2.30308e-07	711995	712026	278	1795	1692	914
regional_specificity_threshold	Z1p2	DEL	L_PHA2	-0.0226645	0.00928021	-2.44224	0.0145971	712013	712044	771	6824	4683	2314
regional_specificity_threshold	Z1p2	DEL	L_V4t	-0.0364263	0.00802368	-4.53985	5.63192e-06	712009	712041	1404	10614	7947	4396
regional_specificity_threshold	Z1p2	DEL	L_FST	0.0124065	0.0197817	0.627173	0.530546	712010	712041	146	2377	2339	442
regional_specificity_threshold	Z1p2	DEL	L_V3CD	-0.259571	0.0313456	-8.28096	1.22758e-16	711955	711987	48	966	964	134
regional_specificity_threshold	Z1p2	DEL	L_LO3	-0.05505	0.0119494	-4.60693	4.08852e-06	712005	712036	764	5508	4607	2170
regional_specificity_threshold	Z1p2	DEL	L_VMV2	-0.0563642	0.0207175	-2.72061	0.00651659	712010	712042	252	1970	1772	857
regional_specificity_threshold	Z1p2	DEL	L_31pd	-0.156789	0.0222197	-7.0563	1.71423e-12	711976	712007	223	2109	1996	643
regional_specificity_threshold	Z1p2	DEL	L_31a	-0.0279977	0.0177101	-1.58089	0.113904	712013	712044	241	2021	1694	749
regional_specificity_threshold	Z1p2	DEL	L_VVC	-0.00934236	0.0145054	-0.64406	0.519537	712012	712044	621	2611	1822	1838
regional_specificity_threshold	Z1p2	DEL	L_25	-0.00862116	0.0159055	-0.542025	0.587802	712012	712044	556	3063	2463	1697
regional_specificity_threshold	Z1p2	DEL	L_s32	-0.0409632	0.00967714	-4.23299	2.30684e-05	712009	712040	943	6149	4226	3034
regional_specificity_threshold	Z1p2	DEL	L_pOFC	-0.0252715	0.0118345	-2.1354	0.0327291	712013	712044	796	4553	3226	2423
regional_specificity_threshold	Z1p2	DEL	L_PoI1	-0.00923234	0.00925507	-0.997545	0.318501	712011	712043	737	6507	4244	2169
regional_specificity_threshold	Z1p2	DEL	L_Ig	-0.0394617	0.0172032	-2.29385	0.0217998	712012	712043	335	3142	2917	1110
regional_specificity_threshold	Z1p2	DEL	L_FOP5	-0.0646374	0.0129967	-4.97339	6.5834e-07	712002	712033	723	4672	3903	2210
regional_specificity_threshold	Z1p2	DEL	L_p10p	-0.0271978	0.0173593	-1.56675	0.117174	712013	712044	465	2519	2084	1405
regional_specificity_threshold	Z1p2	DEL	L_p47r	0.0159101	0.0222129	0.716255	0.473835	712010	712041	267	1556	1285	810
regional_specificity_threshold	Z1p2	DEL	L_TGv	-0.00231836	0.01806	-0.12837	0.897856	712012	712043	335	2792	2450	1052
regional_specificity_threshold	Z1p2	DEL	L_MBelt	0.00482612	0.0231157	0.208781	0.83462	712012	712043	106	1731	1697	327
regional_specificity_threshold	Z1p2	DEL	L_LBelt	-0.0582832	0.0101263	-5.75564	8.64101e-09	711999	712031	1199	6203	4707	3562
regional_specificity_threshold	Z1p2	DEL	L_A4	-0.0171249	0.0543436	-0.315122	0.752669	712013	712044	62	329	324	197
regional_specificity_threshold	Z1p2	DEL	L_STSva	-0.00620783	0.0175118	-0.354494	0.722969	712012	712044	520	2502	2035	1568
regional_specificity_threshold	Z1p2	DEL	L_TE1m	0.0709666	0.0619621	1.14532	0.252077	712011	712042	59	232	223	174
regional_specificity_threshold	Z1p2	DEL	L_PI	-0.00746902	0.0106136	-0.703721	0.481607	712011	712043	462	4620	2806	1463
regional_specificity_threshold	Z1p2	DEL	L_a32pr	-0.0457369	0.0106617	-4.28982	1.78885e-05	712008	712039	984	4980	3415	2935
regional_specificity_threshold	Z1p2	DEL	L_p24	-0.0496449	0.0148173	-3.35048	0.000806829	712009	712041	591	3042	2206	1845
regional_specificity_threshold	Z1p2	DUP	L_V1	-0.0200528	0.00686548	-2.92082	0.00349146	712021	712052	1445	12051	7991	2411
regional_specificity_threshold	Z1p2	DUP	L_MST	0.00908034	0.0767806	0.118264	0.905859	712023	712054	36	157	157	59
regional_specificity_threshold	Z1p2	DUP	L_V6	-0.0141642	0.00695476	-2.03662	0.0416887	712023	712054	1335	11258	6999	2181
regional_specificity_threshold	Z1p2	DUP	L_V2	-0.0206877	0.0100289	-2.0628	0.0391328	712022	712053	1068	8658	6836	1820
regional_specificity_threshold	Z1p2	DUP	L_V3	-0.0430171	0.0136354	-3.1548	0.00160627	712017	712049	602	4067	3098	1024
regional_specificity_threshold	Z1p2	DUP	L_V4	-0.00635654	0.0127418	-0.498872	0.61787	712023	712054	508	4963	3886	824
regional_specificity_threshold	Z1p2	DUP	L_V8	0.00738113	0.00856895	0.861381	0.389029	712019	712050	1417	10316	7256	2263
regional_specificity_threshold	Z1p2	DUP	L_4	-0.0442053	0.0145635	-3.03536	0.00240273	712018	712049	511	3749	3059	799
regional_specificity_threshold	Z1p2	DUP	L_3b	-0.0129154	0.0133832	-0.965044	0.334524	712023	712054	527	4852	4161	812
regional_specificity_threshold	Z1p2	DUP	L_FEF	0.00972065	0.0109013	0.891696	0.372557	712020	712051	612	5709	4151	965
regional_specificity_threshold	Z1p2	DUP	L_PEF	-0.0170826	0.00524558	-3.25656	0.00112785	712021	712053	2746	23123	11837	4326
regional_specificity_threshold	Z1p2	DUP	L_55b	-0.035654	0.0092909	-3.83752	0.000124311	712015	712047	1349	10068	7467	2100
regional_specificity_threshold	Z1p2	DUP	L_V3A	-0.0440249	0.0104871	-4.19802	2.69343e-05	712013	712044	885	6554	5014	1440
regional_specificity_threshold	Z1p2	DUP	L_RSC	-0.00815638	0.0120335	-0.677804	0.497896	712023	712054	596	5737	4175	944
regional_specificity_threshold	Z1p2	DUP	L_POS2	-0.0293356	0.0208212	-1.40892	0.158859	712022	712054	351	1842	1602	580
regional_specificity_threshold	Z1p2	DUP	L_V7	-0.0314918	0.00587452	-5.36074	8.29527e-08	712010	712041	2217	19378	12346	3518
regional_specificity_threshold	Z1p2	DUP	L_IPS1	-0.0395353	0.00671942	-5.88373	4.01623e-09	712004	712035	1705	15219	10047	2761
regional_specificity_threshold	Z1p2	DUP	L_FFC	-0.0487208	0.0111598	-4.36572	1.26752e-05	712011	712042	714	5676	3800	1171
regional_specificity_threshold	Z1p2	DUP	L_V3B	-0.00801659	0.00507855	-1.57852	0.114448	712023	712054	2638	22220	12659	4160
[truncated: 17,269 more rows]

## Sheet: ST4
Category	Experiment_name	mean_unq_genes_del	sd_unq_genes_del	min_unq_genes_del	max_unq_genes_del	mean_total_genes_del	sd_total_genes_del	min_total_genes_del	max_total_genes_del	mean_cnv_carriers_del	sd_cnv_carriers_del	min_cnv_carriers_del	max_cnv_carriers_del	mean_unq_genes_dup	sd_unq_genes_dup	min_unq_genes_dup	max_unq_genes_dup	mean_total_genes_dup	sd_total_genes_dup	min_total_genes_dup	max_total_genes_dup	mean_cnv_carriers_dup	sd_cnv_carriers_dup	min_cnv_carriers_dup	max_cnv_carriers_dup
Data-subsets	AllData	1280.89	379.99	463	2229	8184.99	2822.46	1898	16054	5434.77	1770.49	1385	9600	2507.94	732.98	943	4430	22578.9	6705.13	7773	40993	11686.4	2569.1	5167	17740
	UKBB	1243.16	367.86	456	2159	7591.75	2624.47	1763	14878	5050.31	1655.17	1283	9017	2400.58	700.94	906	4232	20422.3	6070.71	7070	36972	10458.4	2295.19	4662	15904
	Mega	188.08	55.78	61	335	593.24	204.74	135	1176	384.46	121.1	102	680	683.98	202.7	250	1252	2156.67	640.44	703	4021	1228.03	279.23	505	1846
	Discovery	1249.78	369.67	455	2180	7884.04	2726.77	1823	15514	5229.67	1702.83	1333	9209	2468.54	721.76	924	4362	21642.4	6406.57	7505	39283	11138.8	2431.36	4983	16877
	Replication	865.77	256.46	312	1520	3851.5	1320.22	897	7519	2521.46	814.24	642	4473	1848.46	541.41	698	3311	10587.8	3127.29	3719	19237	5388.95	1165.79	2425	8112
Demographic parameters	Anc_EUR	889.36	263.01	325	1548	4333.49	1504.5	1001	8535	2913.32	957.77	743	5127	1971.62	576.8	749	3442	11991.1	3579.67	4054	21756	6297.48	1404.2	2742	9628
	Sex_Male	849.91	251.82	311	1482	3734.62	1240.73	936	7124	2348.64	733.94	645	4074	1845.72	542.25	689	3325	10095.7	2993.74	3516	18583	5153.75	1127.96	2276	7800
	Sex_Female	697.96	206.31	256	1203	3012.73	1075.97	645	6079	2074.59	696.97	491	3694	1630.23	478.33	612	2845	8307.85	2473.69	2803	14786	4399.38	972.11	1931	6671
	Age <60	1280.89	379.99	463	2229	8184.99	2822.46	1898	16054	5434.77	1770.49	1385	9600	2507.94	732.98	943	4430	22578.9	6705.13	7773	40993	11686.4	2569.1	5167	17740
	Age >60	1280.89	379.99	463	2229	8184.99	2822.46	1898	16054	5434.77	1770.49	1385	9600	2507.94	732.98	943	4430	22578.9	6705.13	7773	40993	11686.4	2569.1	5167	17740
Assessment test type	FIvisit	1280.89	379.99	463	2229	8184.99	2822.46	1898	16054	5434.77	1770.49	1385	9600	2507.94	732.98	943	4430	22578.9	6705.13	7773	40993	11686.4	2569.1	5167	17740
	FIonline	1280.89	379.99	463	2229	8184.99	2822.46	1898	16054	5434.77	1770.49	1385	9600	2507.94	732.98	943	4430	22578.9	6705.13	7773	40993	11686.4	2569.1	5167	17740
Regional specificity (Z-score threshold)	Z0p2	1818.08	306.31	1086	2536	11653.2	2585.41	5441	18633	7240.53	1627.51	3353	10722	3560.31	592.57	2147	4839	32078.1	5529.6	18299	44875	14528	1867.85	9843	18292
	Z0p5	1280.89	379.99	463	2229	8184.99	2822.46	1898	16054	5434.77	1770.49	1385	9600	2507.94	732.98	943	4430	22578.9	6705.13	7773	40993	11686.4	2569.1	5167	17740
	Z0p8	846.23	409.14	75	2013	5344.95	2905.95	276	12159	3782.82	1890.09	265	8592	1654.97	792.21	146	4003	14943.3	7092.37	642	37257	8658.54	3202.74	625	16277
	Z1p0	621.11	396.91	14	1883	3932.51	2706.92	47	11803	2922.27	1847.46	47	8116	1215.51	767.99	24	3718	10935.6	6893.29	115	35244	6828.21	3427	114	15895
	Z1p2	449.09	365.71	2	1740	2873.97	2429.81	4	11386	2225.19	1737.81	4	7947	876.24	707.97	3	3452	7861.6	6387.95	6	32670	5185.65	3455.99	6	14779
Differential stability (DS) score threshold	DS0p0	1280.89	379.99	463	2229	8184.99	2822.46	1898	16054	5434.77	1770.49	1385	9600	2507.94	732.98	943	4430	22578.9	6705.13	7773	40993	11686.4	2569.1	5167	17740
	DS0p1	1156.25	343.33	420	2013	7661.46	2714.77	1655	15299	5190.44	1748.66	1285	9289	2254.29	659.83	847	3993	20402	6038.05	7050	37496	10897.1	2423.4	4863	16410
	DS0p2	1026.68	306.29	367	1797	7163.73	2584.05	1515	14676	4994.23	1720.43	1194	9004	1994.68	583.42	752	3540	18041.6	5440.17	6241	33619	10210.3	2343.74	4450	15762
	DS0p3	909.19	271.39	320	1581	6661.35	2463.09	1363	13967	4777.59	1688.67	1125	8769	1750.79	513.97	645	3092	15541.2	4692.94	5545	28381	9163.6	2120.73	4161	13836
	DS0p4	784.05	234.42	273	1370	5865.78	2274.32	1196	13144	4235.5	1569.86	1035	8202	1498.71	438.56	554	2665	13320.2	4084.6	4551	24545	8316.78	2023.37	3387	12788
	DS0p5	661.98	197.88	233	1149	4446.17	1735.64	855	9163	3545.78	1481.95	721	7926	1247.17	365.21	468	2204	10677	3271.04	3339	19063	7056.76	1797.07	3015	11245
	DS0p6	523.28	156.43	181	914	3934.77	1618.89	658	8334	3263.4	1433.99	553	7531	982.49	288.47	360	1734	8454.9	2697.92	2139	16390	5994.47	1647.78	1721	10198
genetic constraint, Loss of Function (LOEUF)	loeuf_0p0_0p35	160.12	50.16	45	280	698.89	455.41	148	1781	625.38	435.76	147	1540	399.12	127.62	114	714	2662.81	1057.28	794	6294	2252.42	849.1	759	4376
	loeuf_0p35_1p0	584.66	179.99	219	1033	3064.41	1238.23	830	6184	2372.22	1018.07	674	5042	1187.69	353.76	447	2106	10514.7	3367.21	2856	18994	7191.66	1995.76	2254	12060
	loeuf_1p0_2p0	536.12	162.12	183	923	4421.69	1699.15	702	8533	3780.79	1500.58	663	7662	921.13	276.66	336	1626	9401.4	2937.29	2044	16138	6525.29	1674.56	1831	10467
Tissue Specificity	hpa_brain_elevated	200.62	52.52	77	328	1111.08	497.69	296	2265	960.08	457.74	275	1922	370.18	92.88	164	601	3400.81	1196.92	850	6636	2689.63	807.19	742	4451
	hpa_other_tissue_elevated	390.68	114.17	142	682	2687.92	1300.72	509	5577	2169.07	934.61	481	3910	763.5	222.39	287	1291	6766.49	2321.01	1596	13345	5268.03	1583.12	1508	8841
	hpa_low_tissue_specificity	689.59	231.92	197	1248	4385.99	1749.49	777	9395	3373.54	1357.34	713	6720	1374.26	446.9	418	2567	12411.6	4064.94	3126	24348	7496.09	1961.67	2359	12135
Cell type marker gene sets	hpa_Excitatory	178	60.29	61	327	900.03	502.94	167	2101	842.56	482.95	161	1989	324.76	107.62	126	598	2728.59	1143.68	643	6053	2451.85	995.19	626	5218
	hpa_Inhibitory	164.23	57.5	54	309	821.47	481.34	136	1932	776.23	465.48	132	1813	304.54	104.08	104	560	2419.24	1094.78	526	5651	2207.22	964.55	507	4875
	hpa_Astrocytes	90.58	34.01	29	179	367.07	162.91	71	809	347.55	148.86	70	745	176.78	64.92	51	342	1296.82	625.64	176	3212	1179.89	544.82	171	2743
	hpa_Microglial	56.54	20.07	13	101	426.56	427.96	20	1294	415.41	426.61	20	1266	104.18	34.05	36	189	901.16	597.32	120	2298	885.72	592.23	120	2260
	hpa_Oligodendrocyte	131.76	62.44	30	323	769.78	570.64	58	2146	705.97	532.18	56	1902	247.64	118.45	55	595	2277.84	1348.95	174	6005	2103.89	1196.24	173	5448
	hpa_OligoPreCells	131.4	42.94	34	245	486.89	166.27	112	892	454.39	148.26	110	807	227.48	70.16	74	420	1321.64	469.01	346	2423	1241.76	431.02	340	2226
Temporal expression peak (Epoch)	BrainVar_PeakEpoch1	409.97	149.41	108	743	2322.99	1188.49	608	5157	1920.11	1035.72	521	4239	786.38	276.61	223	1460	6339.46	2306.32	1640	12890	4526.66	1355.47	1528	7983
	BrainVar_PeakEpoch2	152.85	52.36	50	285	995.19	540.43	147	2386	926.29	523.11	141	2238	290.18	95.76	85	533	3386.03	1433.44	500	6997	2914.58	1204.86	491	6234
	BrainVar_PeakEpoch3	641.01	191.56	223	1163	4433.06	1778.71	925	8834	3272.76	1242.32	729	5880	1300.19	383.83	461	2344	11445	3496.48	3990	20498	7447.21	1872.5	2968	11582
Rising and falling temporal expression profiles	BrainVar_Falling	298.82	110.7	87	578	1821.41	1085.56	433	4398	1553.87	992.48	390	3514	552.39	198.92	164	1031	4843.93	1904.14	1099	9942	3538.9	1122.85	1039	6327
	BrainVar_NonTransitional	505.86	157.63	175	964	2702.17	1094.12	631	5941	2169.61	810.61	478	3828	1015.82	316.42	322	1919	9351.54	3145.03	2807	19318	6631.24	1898.58	1873	10838
	BrainVar_Rising	399.14	116.41	156	687	3227.66	1466.99	621	6706	2586.27	1123.27	580	5113	808.55	232.36	319	1411	6975.06	2132.34	2477	12183	5086.26	1366.11	2188	8080
genetic constraint, pHaplo	pHaplo_cat_low	666.25	201.52	227	1180	5762.89	2228.51	1063	11886	4238.84	1641.62	934	8012	1227.96	363.31	452	2212	12439.2	3998.04	2656	22869	7308.43	1936.08	2258	12056
	pHaplo_cat_mid	367.31	107.98	133	628	1594.24	630.72	379	3288	1341.11	553.93	317	2845	728.52	214.28	269	1261	6192.98	2051.38	2017	11896	4740.09	1357.08	1811	8218
	pHaplo_cat_high	204.74	65.41	74	360	645.38	281.03	128	1405	546.97	248.3	117	1152	470.2	147.41	164	820	3040.84	985.96	1007	5725	2534.43	706.85	933	4232
genetic constraint, pTriplo	pTriplo_cat_low	817.37	249.09	284	1378	5786.76	2193.63	1187	11374	4525.03	1686.77	977	8517	1456.66	434.06	525	2465	14628.4	4575.66	4206	24821	9187.21	2274.84	3484	14649
	pTriplo_cat_mid	328.7	96.45	112	602	1925.74	916.11	460	4500	1434.39	600.73	389	2750	754.01	224.45	258	1417	5831.97	2082.77	1904	12401	4108.12	1247.82	1539	7059
	pTriplo_cat_high	92.23	28.91	30	179	290.01	94.1	72	532	242.43	70.59	71	426	216.01	66.25	60	411	1212.6	418.34	234	2471	970.51	290.4	230	1747
genetic constraint, Missense Z	mis_z_cat_low	653.81	198.44	213	1101	4987.69	1879.62	1023	9486	4069.06	1586.41	928	8277	1146.32	343.36	401	1993	12527.7	3936.7	3616	20826	8108.27	2063.48	3258	12284
	mis_z_cat_mid	574.36	170.65	210	1026	3048.56	1302.37	764	6451	2293.32	954.21	585	4642	1229.4	357.73	471	2197	9432.12	2959.7	3287	18815	6452.06	1669.99	2407	11361
	mis_z_cat_high	52.21	17.69	14	101	147.21	54.45	36	276	136.23	48.52	36	259	131.9	42.6	37	245	618.44	274.79	105	1486	555.14	210.86	104	1151

## Sheet: ST5
Category	Experiment_name	Del_mean	Del_sd	Del_min	Del_max	Del_n-Signif-ROIs-rawPval	Del_n-Signif-ROIs-AdjPval	Dup_mean	Dup_sd	Dup_min	Dup_max	Dup_n-Signif-ROIs-rawPval	Dup_n-Signif-ROIs-AdjPval	ratio_Del-ES-mean_by_Dup-ES-mean	ratio_Del-ES-sd_by_Dup-ES-sd	ratio_Del-ES-min_by_Dup-ES-min	ratio_Del-ES-max_by_Dup-ES-max
Data-subsets	AllData	-0.048	0.024	-0.126	0.015	161	128	-0.023	0.01	-0.066	0.002	159	112	2.087	2.4	1.909	7.5
	UKBB	-0.043	0.025	-0.12	0.02	153	110	-0.022	0.011	-0.065	0.004	150	95	1.955	2.273	1.846	5
	Mega	-0.111	0.038	-0.24	-0.01	155	70	-0.037	0.016	-0.085	0.005	110	5	3	2.375	2.824	-2
	Discovery	-0.051	0.025	-0.136	0.014	165	133	-0.024	0.01	-0.067	0.001	160	118	2.125	2.5	2.03	14
	Replication	-0.039	0.024	-0.115	0.02	130	65	-0.02	0.011	-0.046	0.006	119	42	1.95	2.182	2.5	3.333
Demographic parameters	Anc_EUR	-0.055	0.026	-0.135	0.007	158	113	-0.025	0.012	-0.09	0.005	153	79	2.2	2.167	1.5	1.4
	Sex_Male	-0.056	0.021	-0.13	0	167	112	-0.023	0.013	-0.075	0.013	137	58	2.435	1.615	1.733	0
	Sex_Female	-0.03	0.032	-0.117	0.043	93	41	-0.021	0.012	-0.076	0.028	122	33	1.429	2.667	1.539	1.536
	Age <60	-0.035	0.025	-0.112	0.02	130	80	-0.02	0.012	-0.076	0.013	135	68	1.75	2.083	1.474	1.538
	Age >60	-0.039	0.028	-0.147	0.036	113	59	-0.017	0.007	-0.038	0.014	103	3	2.294	4	3.868	2.571
Assessment test type	FIvisit	-0.037	0.028	-0.121	0.054	104	41	-0.02	0.012	-0.047	0.01	106	22	1.85	2.333	2.574	5.4
	FIonline	-0.056	0.033	-0.148	0.038	139	75	-0.025	0.014	-0.092	0.002	123	35	2.24	2.357	1.609	19
Regional specificity (Z-score threshold)	Z0p2	-0.045	0.016	-0.081	-0.01	176	159	-0.022	0.007	-0.046	-0.005	173	146	2.045	2.286	1.761	2
	Z0p5	-0.048	0.024	-0.126	0.015	161	128	-0.023	0.01	-0.066	0.002	159	112	2.087	2.4	1.909	7.5
	Z0p8	-0.053	0.034	-0.155	0.032	141	97	-0.023	0.019	-0.158	0.008	127	76	2.304	1.789	0.981	4
	Z1p0	-0.057	0.046	-0.261	0.02	123	86	-0.025	0.026	-0.154	0.042	114	60	2.28	1.769	1.695	0.476
	Z1p2	-0.053	0.059	-0.26	0.124	106	66	-0.025	0.035	-0.163	0.1	92	43	2.12	1.686	1.595	1.24
Differential stability (DS) score threshold	DS0p0	-0.048	0.024	-0.126	0.015	161	128	-0.023	0.01	-0.066	0.002	159	112	2.087	2.4	1.909	7.5
	DS0p1	-0.05	0.026	-0.154	0.011	160	125	-0.023	0.01	-0.059	0.005	158	104	2.174	2.6	2.61	2.2
	DS0p2	-0.052	0.028	-0.168	0.015	160	120	-0.024	0.011	-0.062	0.009	158	96	2.167	2.545	2.71	1.667
	DS0p3	-0.052	0.031	-0.19	0.02	153	114	-0.024	0.013	-0.072	0.023	143	83	2.167	2.385	2.639	0.87
	DS0p4	-0.058	0.034	-0.203	0.026	153	115	-0.022	0.015	-0.078	0.026	124	63	2.636	2.267	2.603	1
	DS0p5	-0.056	0.033	-0.165	0.021	151	87	-0.028	0.016	-0.086	0.017	145	68	2	2.062	1.919	1.235
	DS0p6	-0.06	0.037	-0.17	0.019	148	84	-0.037	0.018	-0.105	0.023	158	83	1.622	2.056	1.619	0.826
genetic constraint, Loss of Function (LOEUF)	loeuf_0p0_0p35	-0.135	0.058	-0.255	-0.005	140	63	-0.092	0.037	-0.195	-0.001	170	131	1.467	1.568	1.308	5
	loeuf_0p35_1p0	-0.077	0.033	-0.185	-0.005	170	118	-0.027	0.018	-0.078	0.02	128	76	2.852	1.833	2.372	-0.25
	loeuf_1p0_2p0	-0.02	0.032	-0.113	0.049	70	32	-0.009	0.015	-0.056	0.041	64	12	2.222	2.133	2.018	1.195
Tissue Specificity	hpa_brain_elevated	-0.081	0.059	-0.207	0.031	93	57	-0.019	0.044	-0.178	0.082	91	29	4.263	1.341	1.163	0.378
	hpa_other_tissue_elevated	-0.041	0.031	-0.119	0.058	89	23	-0.007	0.019	-0.058	0.06	57	0	5.857	1.632	2.052	0.967
	hpa_low_tissue_specificity	-0.054	0.035	-0.171	0.033	139	88	-0.036	0.013	-0.08	0.001	174	131	1.5	2.692	2.138	33
Cell type marker gene sets	hpa_Excitatory	-0.118	0.069	-0.246	0.019	121	68	-0.034	0.03	-0.129	0.067	90	15	3.471	2.3	1.907	0.284
	hpa_Inhibitory	-0.108	0.074	-0.233	0.065	103	57	-0.029	0.037	-0.183	0.063	62	10	3.724	2	1.273	1.032
	hpa_Astrocytes	-0.143	0.071	-0.314	0.066	126	67	-0.025	0.048	-0.172	0.128	52	7	5.72	1.479	1.826	0.516
	hpa_Microglial	-0.143	0.087	-0.343	0.093	100	49	0.001	0.048	-0.143	0.091	35	0	-143	1.812	2.399	1.022
	hpa_Oligodendrocyte	-0.099	0.087	-0.385	0.092	93	62	-0.036	0.046	-0.306	0.071	62	11	2.75	1.891	1.258	1.296
	hpa_OligoPreCells	-0.049	0.066	-0.232	0.116	55	6	-0.042	0.023	-0.12	0.034	52	0	1.167	2.87	1.933	3.412
Temporal expression peak (Epoch)	BrainVar_PeakEpoch1	-0.038	0.03	-0.129	0.04	91	14	-0.035	0.018	-0.108	0.008	148	55	1.086	1.667	1.194	5
	BrainVar_PeakEpoch2	-0.087	0.071	-0.239	0.043	94	55	-0.017	0.029	-0.091	0.099	53	2	5.118	2.448	2.626	0.434
	BrainVar_PeakEpoch3	-0.06	0.032	-0.154	0.007	149	104	-0.031	0.017	-0.091	0.013	140	99	1.935	1.882	1.692	0.538
Rising and falling temporal expression profiles	BrainVar_Falling	-0.036	0.037	-0.144	0.045	58	9	-0.033	0.024	-0.134	0.046	118	35	1.091	1.542	1.075	0.978
	BrainVar_NonTransitional	-0.078	0.043	-0.198	0.021	146	94	-0.024	0.018	-0.074	0.019	114	51	3.25	2.389	2.676	1.105
	BrainVar_Rising	-0.059	0.041	-0.185	0.03	124	75	-0.037	0.024	-0.11	0.03	134	88	1.595	1.708	1.682	1
genetic constraint, pHaplo	pHaplo_cat_low	-0.038	0.028	-0.129	0.031	128	85	-0.017	0.014	-0.052	0.021	103	50	2.235	2	2.481	1.476
	pHaplo_cat_mid	-0.078	0.041	-0.206	0.003	139	58	-0.03	0.021	-0.09	0.047	121	43	2.6	1.952	2.289	0.064
	pHaplo_cat_high	-0.091	0.038	-0.22	0.013	138	15	-0.041	0.029	-0.121	0.026	112	43	2.22	1.31	1.818	0.5
genetic constraint, pTriplo	pTriplo_cat_low	-0.026	0.025	-0.122	0.036	90	39	-0.01	0.013	-0.05	0.021	74	16	2.6	1.923	2.44	1.714
	pTriplo_cat_mid	-0.13	0.04	-0.235	-0.02	179	149	-0.053	0.024	-0.115	0.007	164	130	2.453	1.667	2.043	-2.857
	pTriplo_cat_high	-0.039	0.054	-0.248	0.096	12	0	-0.055	0.04	-0.188	0.054	97	21	0.709	1.35	1.319	1.778
genetic constraint, Missense Z	mis_z_cat_low	-0.022	0.027	-0.135	0.03	72	29	-0.015	0.015	-0.063	0.024	89	27	1.467	1.8	2.143	1.25
	mis_z_cat_mid	-0.095	0.04	-0.235	-0.008	165	135	-0.034	0.017	-0.091	0.011	152	88	2.794	2.353	2.582	-0.727
	mis_z_cat_high	-0.097	0.058	-0.302	0.052	19	0	-0.139	0.062	-0.335	0.005	154	74	0.698	0.935	0.901	10.4

## Sheet: ST6
gene_set_exp_category	gene_set_exp	cor_del_dup	cor_del_dup_95CI_min	cor_del_dup_95CI_max	pspin_cor_del_dup	pspin_cor_del_dup_FDR
All_data_analysis_fig2	All_data_analysis_Fig2	-0.366177	-0.491106	-0.226488	5e-05	0.000192593
regional_specificity_threshold	Z0p2	-0.254512	-0.387467	-0.111186	0.00165	0.00204286
regional_specificity_threshold	Z0p5	-0.366177	-0.491106	-0.226488	0.0001	0.000192593
regional_specificity_threshold	Z0p8	-0.346464	-0.486918	-0.188544	0.0001	0.000192593
regional_specificity_threshold	Z1p0	-0.414851	-0.555177	-0.251561	0.0001	0.000192593
regional_specificity_threshold	Z1p2	-0.462037	-0.60567	-0.289246	5e-05	0.000192593
genetic_constraint	genetic_constraint_loeuf_0p0_0p35	-0.67057	-0.747049	-0.576571	0.0001	0.000192593
genetic_constraint	genetic_constraint_loeuf_0p35_1p0	-0.382332	-0.517838	-0.22811	0.0001	0.000192593
genetic_constraint	genetic_constraint_loeuf_1p0_2p0	-0.707196	-0.831028	-0.516573	0.00085	0.00107805
genetic_constraint	genetic_constraint_pHaplo_cat_low	-0.595155	-0.701786	-0.462441	0.0001	0.000192593
genetic_constraint	genetic_constraint_pHaplo_cat_mid	-0.65535	-0.758373	-0.520382	0.0001	0.000192593
genetic_constraint	genetic_constraint_pHaplo_cat_high	-0.136048	-0.394308	0.142129	0.17145	0.185737
genetic_constraint	genetic_constraint_pTriplo_cat_low	-0.671484	-0.798129	-0.488011	0.0002	0.000325
genetic_constraint	genetic_constraint_pTriplo_cat_mid	-0.350807	-0.475482	-0.212317	0.0001	0.000192593
genetic_constraint	genetic_constraint_pTriplo_cat_high	0.238275	-0.215587	0.607477	0.1474	0.163081
genetic_constraint	genetic_constraint_missense_Z_cat_low	-0.69438	-0.813185	-0.520023	5e-05	0.000192593
genetic_constraint	genetic_constraint_missense_Z_cat_mid	-0.384388	-0.510682	-0.241857	0.0001	0.000192593
genetic_constraint	genetic_constraint_missense_Z_cat_high	0.103981	-0.127548	0.324764	0.1907	0.198328
data_subset	UKBB	-0.384316	-0.51218	-0.239786	5e-05	0.000192593
data_subset	Other_5cohort	-0.015684	-0.249738	0.220101	0.4474	0.4474
data_subset	Discovery	-0.420102	-0.556318	-0.261899	0.00015	0.00026
data_subset	Replication	-0.488593	-0.609502	-0.345471	5e-05	0.000192593
data_subset	UKBB_FI_center_visit	-0.394126	-0.535535	-0.231219	0.00065	0.000845
data_subset	UKBB_FI_online	-0.132302	-0.371737	0.123638	0.182	0.193143
demograhpics_subset	Ancestry_EUR	-0.304765	-0.436809	-0.159865	0.0004	0.000562162
demograhpics_subset	Sex_Male	-0.370768	-0.495844	-0.230622	0.00025	0.000371429
demograhpics_subset	Sex_Female	-0.344921	-0.480449	-0.193304	0.0001	0.000192593
demograhpics_subset	Age_lessthan_60	-0.396433	-0.531315	-0.24195	0.00015	0.00026
demograhpics_subset	Age_greaterthan_60	-0.544711	-0.693119	-0.352002	0.0005	0.000684211
gene_expression_AHBA_quality	gene_exp_AHBA_quality_DS0p1	-0.379687	-0.50509	-0.238583	5e-05	0.000192593
gene_expression_AHBA_quality	gene_exp_AHBA_quality_DS0p2	-0.496472	-0.605025	-0.3698	5e-05	0.000192593
gene_expression_AHBA_quality	gene_exp_AHBA_quality_DS0p3	-0.543777	-0.645141	-0.423603	0.0001	0.000192593
gene_expression_AHBA_quality	gene_exp_AHBA_quality_DS0p4	-0.563925	-0.662956	-0.445498	5e-05	0.000192593
gene_expression_AHBA_quality	gene_exp_AHBA_quality_DS0p5	-0.516479	-0.632423	-0.3779	5e-05	0.000192593
gene_expression_AHBA_quality	gene_exp_AHBA_quality_DS0p6	-0.526735	-0.638458	-0.393272	0.0001	0.000192593
tissue_specificity	hpa_brain_elevated	-0.751048	-0.83239	-0.638029	0.0001	0.000192593
tissue_specificity	hpa_other_tissue_elevated	-0.564857	-0.79253	-0.198985	0.005	0.00604651
tissue_specificity	hpa_low_tissue_specificity	-0.444368	-0.5612	-0.310174	0.0001	0.000192593
temporal_expression_BrainVAR_PeakEpoch	BrainVar_PeakEpoch1	-0.413676	-0.599949	-0.184857	0.0006	0.0008
temporal_expression_BrainVAR_PeakEpoch	BrainVar_PeakEpoch2	-0.527538	-0.694165	-0.30725	0.00015	0.00026
temporal_expression_BrainVAR_PeakEpoch	BrainVar_PeakEpoch3	-0.499174	-0.609569	-0.369786	0.0001	0.000192593
temporal_expression_BrainVAR_trajectory	BrainVar_trajectory_Falling	-0.653793	-0.797532	-0.439812	0.00025	0.000371429
temporal_expression_BrainVAR_trajectory	BrainVar_trajectory_NonTransitional	-0.479797	-0.605882	-0.330198	0.0001	0.000192593
temporal_expression_BrainVAR_trajectory	BrainVar_trajectory_Rising	-0.466061	-0.58701	-0.324761	0.0001	0.000192593
cell_type_markers	Excitatory	-0.635922	-0.750743	-0.483803	0.00025	0.000371429
cell_type_markers	Inhibitory	-0.531893	-0.685657	-0.332689	0.0002	0.000325
cell_type_markers	Astrocytes	0.0909825	-0.145408	0.317546	0.2221	0.226455
cell_type_markers	Microglial	-0.262319	-0.506178	0.020381	0.0355	0.0410222
cell_type_markers	Oligodendrocyte	-0.549238	-0.692759	-0.363869	0.0003	0.000433333
cell_type_markers	OligodendrocytePrecursorCells_OPC	0.620913	-0.384301	0.952501	0.1199	0.135539
gene_expression_data	BrainSpan_adult_RNAseq_11regions	-0.853349	-0.972954	-0.372931	0.00704314	0.00832371
gene_expression_data	hpa_RNAseq_73regions	-0.530427	-0.706279	-0.292921	8.84591e-05	0.000192593

## Sheet: ST7
neuromap	cnv_type	corr	pval	pval_FDR
Functional gradient	Del	0.196	0.1469	0.1469
Functional gradient	Dup	-0.259	0.00295	0.00295
T1w/T2w	Del	-0.272	0.0527	0.129993
T1w/T2w	Dup	0.273	0.0021	0.0021
Evolutionary expansion	Del	0.069	0.38805	0.464294
Evolutionary expansion	Dup	-0.359	0.0003	0.00616667
Cerebral blood flow	Del	-0.038	0.40895	0.464294
Cerebral blood flow	Dup	-0.21	0.0139	0.0467545
Cortical thickness	Del	0.382	0.00895	0.03589
Cortical thickness	Dup	-0.248	0.00585	0.03589
PC1 gene expression	Del	0.469	0.00225	0.01665
PC1 gene expression	Dup	-0.148	0.10615	0.201298
PC1 NeuroSynth	Del	0.296	0.09875	0.201298
PC1 NeuroSynth	Dup	-0.062	0.32645	0.416505
Cerebral blood volume	Del	-0.215	0.0638	0.147537
Cerebral blood volume	Dup	-0.064	0.2599	0.356159
Oxygen metabolism	Del	-0.298	0.0078	0.03589
Oxygen metabolism	Dup	-0.068	0.25105	0.356159
Glucose metabolism	Del	-0.339	0.00885	0.03589
Glucose metabolism	Dup	-0.084	0.2216	0.327968
Developmental expansion	Del	0.046	0.3956	0.464294
Developmental expansion	Dup	-0.306	0.0005	0.00616667
Intersubject functional variability	Del	0.005	0.4732	0.4732
Intersubject functional variability	Dup	-0.283	0.00035	0.00616667
Alpha power	Del	-0.221	0.2773	0.366432
Alpha power	Dup	0.026	0.43585	0.4732
Beta power	Del	-0.457	0.02	0.0569231
Beta power	Dup	-0.01	0.469	0.4732
Delta power	Del	0.25	0.16115	0.271025
Delta power	Dup	-0.22	0.0173	0.0533417
Low gamma power	Del	0.048	0.45295	0.4732
Low gamma power	Dup	-0.121	0.18575	0.291067
High gamma power	Del	0.354	0.07445	0.162038
High gamma power	Dup	-0.229	0.02475	0.0654107
Theta power	Del	-0.054	0.4141	0.464294
Theta power	Dup	-0.143	0.11425	0.201298
Allometric scaling NIH	Del	-0.106	0.1888	0.291067
Allometric scaling NIH	Dup	-0.258	0.0017	0.015725
Allometric scaling PNC	Del	-0.192	0.1129	0.201298
Allometric scaling PNC	Dup	-0.209	0.0097	0.03589

[truncated: 5 more sheets: ST8, ST9, ST10, ST11, ST12]
